# Supplementary material
Source: PubMed Central journal article supplement (PMC4077721)
Supplement: NIHMS539023-supplement-1.pdf [file NIHMS539023-supplement-1.pdf]

# SUPPLEMENTARY INFORMATION

doi:10.1038/nature12862

**Supplementary Tables 1-2.** ISG screen data sets. Each table shows complete data sets from ISG screens for DNA and +ssRNA viruses (Table 1) and -ssRNA viruses (Table 2). Data are ranked by virus replication values starting with the strongest inhibitors in the first row. Z scores are included to show distribution. Screening data were normalized to the average of all data points.

Supplementary Table 1. ISG screening data sets for dsDNA and +ssRNA viruses

| VV        |      | PV    |           | CVB  |       | EAV       |      | SINV-G |           | SINV-A |       | ONNV    |      |       |          |      |       |          |      |       |
|-----------|------|-------|-----------|------|-------|-----------|------|--------|-----------|--------|-------|---------|------|-------|----------|------|-------|----------|------|-------|
| Gene      | Rep  | Z     | Gene      | Rep  | Z     | Gene      | Rep  | Z      | Gene      | Rep    | Z     | Gene    | Rep  | Z     |          |      |       |          |      |       |
| ZBP1      | 56.0 | -5.80 | IRF1      | 6.7  | -6.22 | ZBP1      | 28.8 | -7.09  | OAS1      | 17.4   | -4.10 | IRF1    | 12.3 | -4.30 | UNC93B1  | 8.3  | -3.82 |          |      |       |
| EXT1      | 62.2 | -4.99 | APOL6     | 22.8 | -5.15 | TRIM25    | 56.9 | -4.30  | IRF1      | 27.9   | -3.58 | UNC93B1 | 28.5 | -3.50 | UNC93B1  | 12.3 | -4.94 | SAMD4A   | 9.1  | -3.79 |
| EHD4      | 63.8 | -4.79 | TRIM25    | 27.7 | -4.82 | IRF1      | 63.5 | -3.64  | OAS2      | 33.2   | -3.32 | cGAS    | 28.8 | -3.49 | cGAS     | 30.6 | -3.91 | IRF1     | 11.3 | -3.69 |
| NFIL3     | 67.6 | -4.29 | TRAFD1    | 29.4 | -4.71 | TNFRSF10A | 65.7 | -3.42  | HPSE      | 33.8   | -3.29 | P2RY6   | 35.9 | -3.14 | ZBP1     | 35.2 | -3.65 | MYD88    | 22.3 | -3.23 |
| IMPA2     | 69.8 | -4.01 | EPST11    | 30.8 | -4.61 | MKX       | 66.5 | -3.34  | P2RY6     | 34.4   | -3.26 | TRIM14  | 35.9 | -3.14 | SLC15A3  | 36.0 | -3.60 | IRF2     | 26.1 | -3.08 |
| TNFRSF10A | 70.7 | -3.89 | ZBP1      | 44.4 | -3.71 | THBD      | 70.3 | -2.97  | IRF2      | 37.3   | -3.12 | MAP3K14 | 36.9 | -3.09 | MAP3K14  | 39.7 | -3.40 | IFITM3   | 30.6 | -2.89 |
| SCARB2    | 76.0 | -3.19 | RARRES3   | 50.1 | -3.33 | TRIM14    | 71.7 | -2.83  | TRIM25    | 46.9   | -2.64 | SLC15A3 | 38.8 | -3.00 | APOL1    | 48.6 | -2.90 | MAP3K14  | 34.5 | -2.73 |
| IRF1      | 77.0 | -3.06 | ELF1      | 51.6 | -3.22 | BCL3      | 77.0 | -2.31  | cGAS      | 49.5   | -2.51 | STARD5  | 40.9 | -2.90 | AGPAT9   | 50.1 | -2.81 | cGAS     | 35.3 | -2.70 |
| MKX       | 78.7 | -2.84 | EHD4      | 52.4 | -3.17 | LEPR      | 77.7 | -2.24  | MAP3K14   | 53.6   | -2.31 | EHD4    | 44.0 | -2.74 | TRIM14   | 51.9 | -2.71 | SCO2     | 37.4 | -2.60 |
| RGS1      | 80.1 | -2.66 | THBD      | 52.9 | -3.14 | APOL6     | 78.2 | -2.19  | FUT4      | 56.6   | -2.16 | TRIM25  | 45.3 | -2.68 | EHD4     | 52.3 | -2.69 | HES4     | 37.7 | -2.59 |
| GALNT2    | 81.5 | -2.47 | TLR3      | 65.5 | -2.30 | MX1       | 78.3 | -2.17  | MYD88     | 60.2   | -1.98 | IFIT1   | 49.2 | -2.49 | FAM134B  | 56.5 | -2.45 | TBX3     | 40.0 | -2.50 |
| FAM134B   | 84.0 | -1.19 | TDRD7     | 66.1 | -2.26 | TRAFD1    | 79.8 | -2.03  | BCL2L14   | 62.1   | -1.89 | HPSE    | 49.2 | -2.49 | KIAA1618 | 57.1 | -2.42 | JUNB     | 45.7 | -2.26 |
| NPAS2     | 84.8 | -2.05 | TNFRSF10A | 68.4 | -2.11 | TCF7L2    | 81.2 | -1.89  | CSDA      | 62.2   | -1.85 | AQP9    | 50.3 | -2.44 | IRF2     | 57.5 | -2.39 | FLJ23556 | 46.4 | -2.23 |
| ATF3      | 84.8 | -2.04 | BCL3      | 72.0 | -1.87 | IFI6      | 82.0 | -1.81  | MICB      | 63.2   | -1.83 | IRF7    | 50.3 | -2.44 | HES4     | 58.8 | -2.32 | THOC4    | 47.6 | -2.18 |
| EPAS1     | 85.1 | -2.01 | PHF15     | 72.6 | -1.83 | IFI44L    | 82.8 | -1.73  | IRF7      | 63.9   | -1.80 | IRF2    | 51.6 | -2.37 | IRF7     | 60.2 | -2.24 | P2RY6    | 48.5 | -2.15 |
| STARD5    | 85.6 | -1.93 | KIAA0040  | 75.6 | -1.63 | IL15RA    | 83.5 | -1.66  | ZBP1      | 65.9   | -1.80 | SAMD4A  | 54.5 | -2.23 | SAMD4A   | 62.1 | -2.13 | ZBP1     | 49.3 | -2.11 |
| HPSE      | 86.0 | -1.89 | IFI44L    | 76.1 | -1.59 | NPAS2     | 84.0 | -1.61  | PIM3      | 63.1   | -1.74 | MYD88   | 56.8 | -2.12 | STARD5   | 62.5 | -2.11 | NT5C3    | 50.0 | -2.08 |
| FCGR1A    | 88.1 | -1.61 | OASL      | 76.3 | -1.58 | AHNAK2    | 84.8 | -1.54  | TNFRSF10A | 65.8   | -1.70 | IFITM3  | 57.4 | -2.09 | FUT4     | 63.3 | -2.07 | ADM      | 50.8 | -2.05 |
| ANGPTL1   | 88.5 | -1.56 | FAM46C    | 78.7 | -1.42 | ADAR      | 85.3 | -1.48  | OASL      | 65.8   | -1.70 | THOC4   | 58.9 | -2.01 | TRIM25   | 67.0 | -1.86 | BCL3     | 53.5 | -1.93 |
| FAM46C    | 89.3 | -1.45 | LAMP3     | 80.0 | -1.34 | FAM46A    | 86.1 | -1.40  | BCL3      | 69.1   | -1.54 | ZBP1    | 60.8 | -1.92 | THOC4    | 72.0 | -1.58 | SLC15A3  | 54.3 | -1.90 |
| NAPA      | 89.4 | -1.44 | NT5C3     | 81.6 | -1.23 | GBP3      | 86.2 | -1.39  | IFIH1     | 70.6   | -1.46 | MICB    | 62.3 | -1.85 | AQP9     | 72.6 | -1.54 | ZNF385B  | 56.0 | -1.83 |
| TBX3      | 90.1 | -1.35 | PNPT1     | 81.7 | -1.22 | ATF3      | 86.2 | -1.39  | SAMD4A    | 71.0   | -1.45 | C5orf39 | 62.3 | -1.85 | HPSE     | 72.6 | -1.54 | PPM1K    | 56.7 | -1.80 |
| MAFF      | 90.2 | -1.34 | MCOLN2    | 82.4 | -1.17 | cGAS      | 86.5 | -1.36  | CXCL9     | 72.1   | -1.39 | IFITM3  | 67.6 | -1.59 | JUNB     | 73.0 | -1.52 | MT1G     | 58.3 | -1.74 |
| LEPR      | 91.5 | -1.16 | FAM134B   | 82.4 | -1.17 | IL1R      | 86.9 | -1.32  | STAT2     | 72.1   | -1.39 | CD9     | 70.7 | -1.44 | DDX58    | 74.5 | -1.44 | CNNA1    | 60.6 | -1.64 |
| SLC1A1    | 91.8 | -1.13 | IL28RA    | 83.0 | -1.14 | NT5C3     | 87.0 | -1.31  | ARHGEF3   | 72.1   | -1.39 | ANGPTL1 | 71.2 | -1.41 | TLR3     | 75.5 | -1.38 | TIMP1    | 60.9 | -1.63 |
| IL15RA    | 92.2 | -1.08 | XAF1      | 83.2 | -1.12 | CX3CL1    | 87.4 | -1.28  | CXCL10    | 72.8   | -1.35 | FCGR1A  | 71.5 | -1.40 | MICB     | 75.7 | -1.37 | BAG1     | 61.2 | -1.61 |
| CCDC92    | 93.1 | -0.95 | MX1       | 83.3 | -1.11 | IL28RA    | 87.7 | -1.25  | THBD      | 73.2   | -1.34 | ATF3    | 71.5 | -1.40 | IFIH1    | 76.5 | -1.33 | MT1G     | 62.2 | -1.57 |
| TMEM140   | 93.7 | -0.87 | IL6ST     | 84.3 | -1.05 | TRIM21    | 87.7 | -1.24  | SLC25A28  | 73.9   | -1.30 | IFIH1   | 71.5 | -1.40 | CCDC92   | 76.8 | -1.30 | FUT4     | 62.4 | -1.57 |
| PML       | 94.0 | -0.84 | JAK2      | 84.5 | -1.03 | EHD4      | 87.8 | -1.23  | CES1      | 74.3   | -1.28 | CCDC92  | 72.0 | -1.37 | GJA4     | 77.0 | -1.29 | STAT2    | 62.8 | -1.55 |
| C5orf39   | 94.1 | -0.83 | IFI6      | 84.7 | -1.02 | HERC6     | 88.3 | -1.18  | MAB21L2   | 74.7   | -1.26 | RAB27A  | 73.3 | -1.31 | IFITM1   | 77.0 | -1.29 | SSBP3    | 64.3 | -1.49 |
| DUSP5     | 94.1 | -0.82 | TAP2      | 85.0 | -1.00 | RBCK1     | 88.3 | -1.18  | HS2D      | 75.0   | -1.24 | DDX58   | 73.3 | -1.31 | LAMP3    | 77.2 | -1.28 | CD74     | 64.6 | -1.48 |
| SPSB1     | 94.6 | -0.76 | OPTN      | 85.3 | -0.98 | TDRD7     | 88.4 | -1.18  | HES4      | 75.4   | -1.23 | HES4    | 73.3 | -1.31 | IFITM2   | 77.6 | -1.26 | MT1F     | 64.6 | -1.48 |
| IFI30     | 94.6 | -0.76 | BUB1      | 85.4 | -0.98 | MAFB      | 88.4 | -1.17  | LAMP3     | 75.4   | -1.23 | SMAD3   | 76.5 | -1.15 | LGMN     | 78.2 | -1.23 | SECTM1   | 65.9 | -1.42 |
| FLT1      | 94.7 | -0.76 | FAM46A    | 85.5 | -0.96 | JAK2      | 88.6 | -1.16  | MT1X      | 75.8   | -1.21 | FAM46C  | 77.0 | -1.13 | IFITM3   | 80.1 | -1.12 | FAM134B  | 65.9 | -1.42 |
| BTN3A3    | 95.1 | -0.70 | CX3CL1    | 85.8 | -0.95 | IL6ST     | 88.8 | -1.13  | STAP1     | 75.8   | -1.21 | GBP5    | 77.8 | -1.09 | SECTM1   | 80.7 | -1.09 | HPSE     | 66.2 | -1.41 |
| CCR1      | 95.1 | -0.69 | TAP1      | 86.1 | -0.93 | CLEC4D    | 89.0 | -1.12  | FAM70A    | 76.5   | -1.17 | FBXO6   | 77.8 | -1.09 | PSMB9    | 81.1 | -1.07 | AIM2     | 66.2 | -1.41 |
| ANKFY1    | 95.3 | -0.67 | ATP10D    | 86.9 | -0.87 | MICB      | 89.3 | -1.09  | HLA-F     | 76.9   | -1.15 | SECTM1  | 78.3 | -1.06 | MCOLN2   | 81.1 | -1.07 | TAGAP    | 66.9 | -1.38 |
| SIRPA     | 95.4 | -0.66 | DTX3L     | 87.2 | -0.86 | ATP10D    | 89.3 | -1.08  | PSMB9     | 76.9   | -1.15 | TNFAIP3 | 78.6 | -1.05 | TRIM5    | 81.3 | -1.05 | RASSF4   | 67.3 | -1.36 |
| STEAP4    | 95.4 | -0.66 | AHNAK2    | 88.6 | -0.76 | ABLIM3    | 89.4 | -1.07  | IL28RA    | 76.9   | -1.15 | CSDA    | 79.4 | -1.01 | HLA-F    | 81.5 | -1.04 | CREB3L3  | 67.7 | -1.34 |
| NT5C3     | 95.5 | -0.65 | PCTK2     | 88.7 | -0.76 | CD80      | 89.4 | -1.07  | ARG2      | 77.3   | -1.13 | ZAP     | 79.4 | -1.01 | MSR1     | 82.3 | -1.00 | IL28RA   | 67.9 | -1.34 |
| PSCD1     | 95.8 | -0.60 | TNFAIP3   | 89.1 | -0.73 | TNFAIP3   | 89.5 | -1.06  | OGFR      | 77.3   | -1.13 | CES1    | 79.6 | -1.00 | IFIT5    | 82.5 | -0.99 | IL1RN    | 67.9 | -1.34 |
| HK2       | 95.8 | -0.60 | MX1       | 89.8 | -0.68 | AKT3      | 89.6 | -1.06  | RBCK1     | 77.6   | -1.12 | FAM70A  | 79.6 | -1.00 | RASSF4   | 83.2 | -0.95 | ARHGEF3  | 69.2 | -1.28 |
| SOC2      | 96.2 | -0.56 | NDC80     | 90.0 | -0.67 | MCOLN2    | 89.7 | -1.05  | HLA-C     | 78.7   | -1.06 | LAMP3   | 79.9 | -0.99 | RAB27A   | 83.8 | -0.91 | EHD4     | 69.6 | -1.26 |
| CLEC4E    | 96.2 | -0.55 | HERC6     | 90.3 | -0.65 | DNAPT6    | 89.8 | -1.03  | PPM1K     | 78.7   | -1.06 | CD69    | 80.7 | -0.95 | ATF3     | 84.0 | -0.90 | MAX      | 71.4 | -1.19 |
| IRF7      | 96.4 | -0.53 | IL15RA    | 91.2 | -0.58 | ERLIN1    | 90.2 | -0.99  | IFI6      | 79.1   | -1.04 | ETV7    | 80.7 | -0.95 | FAM70A   | 84.0 | -0.90 | MT1H     | 71.5 | -1.19 |
| BCL3      | 96.5 | -0.51 | cGAS      | 91.6 | -0.56 | IFITM3    | 90.3 | -0.98  | GBP3      | 79.8   | -1.01 | PSMB9   | 80.9 | -0.94 | FCGR1A   | 84.2 | -0.89 | C5orf27  | 71.8 | -1.17 |
| EPST11    | 96.5 | -0.51 | MKX       | 92.3 | -0.51 | CNNA1     | 90.4 | -0.97  | ADM       | 80.6   | -0.97 | THBD    | 81.2 | -0.92 | SOC3     | 84.4 | -0.88 | PPM1K    | 72.1 | -1.16 |
| CDKN1A    | 96.7 | -0.49 | APOL2     | 92.5 | -0.50 | CCR1      | 90.4 | -0.97  | PRIC28K1  | 80.6   | -0.97 | RASSF4  | 81.2 | -0.92 | CD9      | 84.6 | -0.87 | STAP1    | 72.4 | -1.15 |
| MARCKS    | 96.7 | -0.48 | CLEC4E    | 92.9 | -0.48 | SLC15A3   | 90.7 | -0.95  | IL15      | 80.6   | -0.97 | IL28RA  | 81.2 | -0.92 | ZAP      | 84.6 | -0.87 | IGFBP2   | 72.8 | -1.13 |
| ADFP      | 96.9 | -0.46 | STAT2     | 93.1 | -0.46 | ZNF385B   | 90.8 | -0.93  | IL1RN     | 80.9   | -0.95 | DHX58   | 81.5 | -0.91 | MAP3K5   | 85.4 | -0.83 | MAB21L2  | 73.1 | -1.12 |
| AGPAT9    | 97.1 | -0.44 | ARNTL     | 93.8 | -0.41 | C5orf27   | 91.0 | -0.92  | CD163     | 80.9   | -0.95 | SOC3    | 81.5 | -0.91 | CES1     | 85.6 | -0.81 | CNND3    | 74.4 | -1.06 |
| STAP1     | 97.2 | -0.42 | NOD2      | 94.1 | -0.39 | IL1RN     | 91.1 | -0.90  | CCL19     | 81.3   | -0.93 | ZNF313  | 81.5 | -0.91 | SOC2     | 85.9 | -0.79 | GAK      | 74.9 | -1.05 |
| CD163     | 97.2 | -0.42 | RGS1      | 94.2 | -0.39 | DUSP5     | 91.3 | -0.89  | RIK2      | 81.3   | -0.93 | GALNT2  | 81.5 | -0.91 | SMAD3    | 86.3 | -0.77 | UNC84B   | 79.9 | -1.05 |
| SLC16A1   | 97.3 | -0.41 | ENPP1     | 94.6 | -0.36 | MT1F      | 91.7 | -0.85  | LMO2      | 82.1   | -0.90 | RBM25   | 82.0 | -0.89 | C5orf91  | 86.7 | -0.75 | IMP2     | 75.4 | -1.02 |
| S100A8    | 97.5 | -0.39 | TRIM21    | 94.7 | -0.36 | OGFR      | 91.8 | -0.84  | CCDC109B  | 82.1   | -0.90 | LRG1    | 82.5 | -0.86 | PABPC4   | 86.9 | -0.74 | PTMA     | 76.5 | -0.98 |
| MT1F      | 97.5 | -0.38 | LGALS9    | 94.8 | -0.35 | ADAMDEC1  | 91.9 | -0.83  | CYP1B1    | 82.4   | -0.88 | OGFR    | 82.8 | -0.85 | LINC     | 86.9 | -0.74 | MX1      | 77.6 | -0.93 |
| ATP10D    | 97.5 | -0.38 | MYD88     | 94.8 | -0.35 | ADM       | 91.9 | -0.82  | CCDC92    | 82.4   | -0.88 | SLC16A1 | 83.5 | -0.81 | CLEC4E   | 87.1 | -0.73 | CLEC2B   | 78.3 | -0.90 |
| CCL2      | 97.6 | -0.37 | UPP2      | 95.0 | -0.34 | STAT1     | 91.9 | -0.82  | EIF3EP2   | 82.4   | -0.88 | EPAS1   | 83.5 | -0.81 | BST2     | 87.1 | -0.73 | IFI30    | 78.6 | -0.89 |
| RAB27A    | 97.6 | -0.37 | C2orf31   | 95.3 | -0.32 | C5orf91   | 92.1 | -0.81  | DEFB1     | 82.8   | -0.86 | CRY1    | 83.5 | -0.81 | CD69     | 87.5 | -0.71 | STAT1    | 78.8 | -0.88 |
| ZNF385B   | 97.6 | -0.37 | NMI       | 95.4 | -0.31 | NCF1      | 92.1 | -0.81  | FCGR1A    | 82.8   | -0.86 | TRIM5   | 84.1 | -0.78 | GAK      | 87.7 | -0.69 | IFITM2   | 78.9 | -0.88 |
| PI4K2B    | 97.7 | -0.36 | UNC84B    | 95.4 | -0.30 | AGPAT9    | 92.6 | -0.75  | GBP1      | 83.2   | -0.84 | BST2    | 84.3 | -0.77 | ZNF313   | 88.3 | -0.66 | DDIT4    | 79.1 | -0.87 |
| ADM       | 97.7 | -0.36 | DCP1A     | 95.9 | -0.28 | WHDC1     | 93.0 | -0.72  | OAS3      | 83.2   | -0.84 | TLR3    | 84.9 | -0.74 | STAT2    | 88.5 | -0.65 | IFITM3   | 79.2 | -0.87 |
| MYD88     | 97.7 | -0.35 | ULK4      | 96.0 | -0.27 | PPM1K     | 93.0 | -0.72  | IFI27     | 83.5   | -0.82 | WHDC1   | 85.4 | -0.72 | CD274    | 88.5 | -0.65 | IFI6     | 80.1 | -0.83 |
| LRG1      | 97.8 | -0.34 | STAP1     | 96.1 | -0.26 | ARHGEF3   | 9    |        |           |        |       |         |      |       |          |      |       |          |      |       |

| VV<br>Gene | Rep   | Z     | PV       |       | CVB   |          | EAV   |       | SINV-G   |      | SINV-A |          | ONNV |       |          |      |       |          |       |       |
|------------|-------|-------|----------|-------|-------|----------|-------|-------|----------|------|--------|----------|------|-------|----------|------|-------|----------|-------|-------|
|            |       |       | Gene     | Rep   | Z     | Gene     | Rep   | Z     | Gene     | Rep  | Z      | Gene     | Rep  | Z     |          |      |       |          |       |       |
| PFKFB3     | 98.5  | -0.25 | P2RY6    | 97.6  | -0.16 | FNDC4    | 94.3  | -0.59 | ERLIN1   | 86.9 | -0.66  | RIK2     | 90.4 | -0.47 | IFI27    | 92.7 | -0.41 | LAP3     | 86.0  | -0.58 |
| CSDA       | 98.5  | -0.25 | HS2D     | 97.6  | -0.16 | STEAP4   | 94.4  | -0.58 | PKD1     | 87.2 | -0.64  | CCR1     | 90.6 | -0.46 | GBP5     | 92.9 | -0.40 | HLA-C    | 86.5  | -0.56 |
| LAMP3      | 98.6  | -0.24 | IFI27    | 97.7  | -0.16 | IFI44    | 94.4  | -0.58 | TRIM21   | 87.2 | -0.64  | FAM46A   | 90.6 | -0.46 | ADM      | 92.9 | -0.40 | PBEF1    | 87.6  | -0.52 |
| SCO2       | 98.6  | -0.24 | AGPAT9   | 97.7  | -0.15 | FAM134B  | 94.6  | -0.56 | THOC4    | 87.6 | -0.62  | CLEC4E   | 90.9 | -0.45 | CSDA     | 93.1 | -0.39 | SERPINB9 | 87.9  | -0.50 |
| FNDC4      | 98.6  | -0.24 | NFIL3    | 97.8  | -0.15 | GCA      | 94.6  | -0.56 | PSMB8    | 87.6 | -0.62  | CMAH     | 90.9 | -0.45 | PML      | 93.1 | -0.39 | COMMD3   | 88.1  | -0.50 |
| FBXO6      | 98.6  | -0.23 | IFIT3    | 97.9  | -0.14 | HLA-C    | 94.7  | -0.55 | ZNF385B  | 88.0 | -0.60  | SNN      | 91.1 | -0.44 | MX2      | 93.1 | -0.39 | PIM3     | 88.3  | -0.49 |
| MTHFD2L    | 98.7  | -0.22 | FKBP5    | 98.0  | -0.13 | TIMP1    | 94.7  | -0.55 | CCNA1    | 88.0 | -0.60  | FLJ39739 | 91.1 | -0.44 | ELF1     | 93.1 | -0.39 | CCL2     | 88.3  | -0.49 |
| GAK        | 98.7  | -0.22 | IFITM3   | 98.1  | -0.13 | THOC4    | 94.9  | -0.53 | FFAR2    | 88.0 | -0.60  | DDIT4    | 91.4 | -0.42 | PTMA     | 93.3 | -0.38 | GCA      | 88.6  | -0.47 |
| OGFR       | 98.8  | -0.21 | GBP1     | 98.3  | -0.11 | IRF9     | 95.0  | -0.52 | UBE2L6   | 88.3 | -0.58  | IGFBP2   | 91.4 | -0.42 | IFI6     | 93.3 | -0.38 | NCF1     | 88.6  | -0.47 |
| ENPP1      | 98.8  | -0.21 | HES4     | 98.5  | -0.10 | PDGFRL   | 95.0  | -0.52 | GTPBP2   | 88.3 | -0.58  | ABLIM3   | 91.7 | -0.41 | MAX      | 93.3 | -0.38 | TCF7L2   | 88.8  | -0.47 |
| LY6E       | 98.8  | -0.21 | NCF1     | 98.5  | -0.10 | IL15     | 95.3  | -0.49 | C1S      | 88.3 | -0.58  | FFAR2    | 91.7 | -0.41 | MAB21L2  | 93.5 | -0.37 | HEG1     | 89.1  | -0.45 |
| IFITM3     | 98.8  | -0.21 | FAM70A   | 98.7  | -0.09 | PNRC1    | 95.3  | -0.49 | MAX      | 88.7 | -0.57  | MAB21L2  | 91.9 | -0.40 | IFITM3   | 93.5 | -0.37 | AKT3     | 89.1  | -0.45 |
| ODC1       | 98.9  | -0.20 | ADAMDEC1 | 98.8  | -0.08 | NDC80    | 95.3  | -0.49 | ADAR     | 88.7 | -0.57  | PTMA     | 92.2 | -0.38 | SCARB2   | 94.3 | -0.32 | TMEM49   | 89.2  | -0.45 |
| APOL6      | 98.9  | -0.20 | CCNA1    | 98.9  | -0.07 | C1S      | 95.4  | -0.48 | RBM25    | 88.7 | -0.57  | STAT2    | 92.5 | -0.37 | GTPBP2   | 94.3 | -0.32 | LIPA     | 89.4  | -0.44 |
| UNC93B1    | 98.9  | -0.20 | ANGPTL1  | 99.1  | -0.06 | USP18    | 95.5  | -0.47 | C15orf48 | 89.1 | -0.55  | G6PC     | 92.5 | -0.37 | HLA-C    | 94.3 | -0.32 | C1S      | 90.1  | -0.41 |
| DYLN1T1    | 98.9  | -0.19 | STAT1    | 99.2  | -0.06 | FLJ23556 | 95.6  | -0.46 | ISG20    | 89.1 | -0.55  | RPL22    | 92.5 | -0.37 | IL1RN    | 94.3 | -0.32 | VEGFC    | 90.1  | -0.41 |
| PBEF1      | 98.9  | -0.19 | FLJ23556 | 99.2  | -0.05 | TBX3     | 95.6  | -0.46 | TIMP1    | 89.4 | -0.53  | MCL1     | 92.5 | -0.37 | TYMP     | 94.3 | -0.32 | ADAMDEC1 | 90.5  | -0.39 |
| ISG15      | 99.0  | -0.19 | COMMD3   | 99.3  | -0.05 | CLEC2B   | 95.8  | -0.44 | CCL2     | 89.4 | -0.53  | FAM134B  | 92.5 | -0.37 | KIAA0082 | 94.3 | -0.32 | CXCL9    | 91.0  | -0.38 |
| CCND3      | 99.0  | -0.19 | ALDH1A1  | 99.3  | -0.04 | SLC16A1  | 96.1  | -0.41 | FAM46C   | 89.4 | -0.53  | PDGFRL   | 92.7 | -0.36 | DDIT4    | 94.5 | -0.31 | OGFR     | 91.2  | -0.36 |
| GEM        | 99.0  | -0.19 | GK       | 99.4  | -0.04 | RAB27A   | 96.1  | -0.41 | MT1M     | 98.8 | -0.51  | TREX1    | 93.0 | -0.35 | PSMB8    | 94.6 | -0.30 | CLECEA   | 91.4  | -0.36 |
| GBP3       | 99.0  | -0.18 | ABLIM3   | 99.4  | -0.04 | RGS1     | 96.2  | -0.40 | DNAPT6   | 89.8 | -0.51  | OASL     | 93.0 | -0.35 | CXCL9    | 94.6 | -0.30 | GBP3     | 91.8  | -0.34 |
| PRIC285    | 99.0  | -0.18 | GCH1     | 99.4  | -0.04 | SIRPA    | 96.4  | -0.38 | RASSF4   | 90.2 | -0.49  | PHF11    | 93.2 | -0.33 | RBM25    | 94.8 | -0.29 | MXK      | 91.8  | -0.34 |
| PPM1K      | 99.1  | -0.18 | IL1R     | 99.5  | -0.03 | DDX3X    | 96.5  | -0.37 | MX1      | 90.6 | -0.47  | TRIM38   | 93.2 | -0.33 | C4orf32  | 95.2 | -0.27 | TRIM14   | 92.0  | -0.33 |
| B2M        | 99.2  | -0.16 | DUSP5    | 99.6  | -0.03 | SLC25A30 | 96.5  | -0.37 | CCL8     | 90.9 | -0.46  | GZMB     | 93.2 | -0.33 | ADFP     | 95.2 | -0.27 | BLVRA    | 92.0  | -0.33 |
| MT1M       | 99.2  | -0.16 | PPM1K    | 99.6  | -0.03 | MAX      | 96.5  | -0.37 | C4orf33  | 90.9 | -0.46  | NRN1     | 93.2 | -0.33 | FLJ39739 | 95.2 | -0.27 | C9orf91  | 92.4  | -0.32 |
| RARRES3    | 99.2  | -0.16 | DDX3X    | 99.7  | -0.02 | NOD2     | 96.6  | -0.36 | NDC80    | 90.9 | -0.46  | RARRES3  | 93.5 | -0.32 | ARHGEF3  | 95.2 | -0.27 | LRG1     | 92.4  | -0.32 |
| SLC25A28   | 99.3  | -0.15 | IFITM3   | 99.7  | -0.02 | MSR1     | 96.8  | -0.34 | IFIT3    | 90.9 | -0.46  | C4orf32  | 93.8 | -0.31 | RIK2     | 95.4 | -0.26 | PM2      | 92.7  | -0.30 |
| CX3CL1     | 99.3  | -0.15 | ADAR     | 99.7  | -0.02 | LAMP3    | 96.9  | -0.33 | CCR1     | 90.9 | -0.46  | TMEM51   | 94.0 | -0.30 | EIF3EIP  | 95.4 | -0.26 | PRKDR    | 92.7  | -0.30 |
| C9orf19    | 99.3  | -0.15 | MICB     | 99.8  | -0.02 | HLA-F    | 97.0  | -0.32 | SERPINB9 | 91.3 | -0.44  | SIRPA    | 94.0 | -0.30 | CMAH     | 95.6 | -0.25 | MAFF     | 93.1  | -0.29 |
| UBE2L6     | 99.3  | -0.15 | UNC93B1  | 100.0 | 0.00  | DDIT4    | 97.0  | -0.32 | PM2      | 91.3 | -0.44  | GTPBP1   | 94.0 | -0.30 | TDRD7    | 95.6 | -0.25 | RIK2     | 93.6  | -0.27 |
| CLEC2B     | 99.3  | -0.14 | IRF9     | 100.0 | 0.00  | MARCKS   | 97.2  | -0.30 | EHDA4    | 91.3 | -0.44  | CRP      | 94.0 | -0.30 | CCND3    | 95.8 | -0.24 | LGALS3   | 93.7  | -0.26 |
| BLVRA      | 99.3  | -0.14 | RBCK1    | 100.0 | 0.00  | GBP4     | 97.3  | -0.29 | RGS1     | 91.3 | -0.44  | PIM3     | 94.0 | -0.30 | DHX58    | 96.0 | -0.23 | ISG15    | 94.0  | -0.25 |
| LINC       | 99.4  | -0.14 | FNDC3B   | 100.1 | 0.01  | BAG1     | 97.4  | -0.28 | GBP5     | 91.7 | -0.42  | CD80     | 94.3 | -0.28 | CCDC109B | 96.0 | -0.23 | IL15     | 94.4  | -0.23 |
| IGFBP2     | 99.4  | -0.14 | C4orf33  | 100.2 | 0.01  | ENPP1    | 97.5  | -0.27 | PCTK2    | 91.7 | -0.42  | PRIC285  | 94.3 | -0.28 | ISG15    | 96.0 | -0.23 | LGMM     | 94.6  | -0.23 |
| RBCK1      | 99.4  | -0.14 | SSBP3    | 100.2 | 0.01  | AQP9     | 97.8  | -0.24 | AQP9     | 92.0 | -0.40  | LGALS3   | 94.3 | -0.28 | C5orf27  | 96.0 | -0.23 | C2orf31  | 94.6  | -0.23 |
| ANKRD22    | 99.4  | -0.13 | SECTM1   | 100.2 | 0.01  | PNPT1    | 97.9  | -0.23 | ATF3     | 92.8 | -0.36  | RNASE4   | 94.5 | -0.27 | CCL8     | 96.2 | -0.22 | CCL8     | 94.9  | -0.21 |
| STAT2      | 99.5  | -0.13 | UBE2L6   | 100.2 | 0.01  | TAP1     | 97.9  | -0.23 | ALDH1A1  | 93.1 | -0.35  | AGPAT9   | 94.5 | -0.27 | FNDC4    | 96.2 | -0.22 | RNF19B   | 94.9  | -0.21 |
| MAX        | 99.5  | -0.12 | IGFBP2   | 100.2 | 0.02  | IFI6     | 97.9  | -0.23 | SAMHD1   | 93.1 | -0.35  | UBE2L6   | 94.5 | -0.27 | NCF1     | 96.2 | -0.22 | IL1R     | 95.0  | -0.21 |
| SERPINB9   | 99.5  | -0.12 | TRIM38   | 100.4 | 0.03  | VAMP5    | 98.3  | -0.20 | CLEC4D   | 93.5 | -0.33  | MX1      | 94.5 | -0.27 | PLSCR1   | 96.4 | -0.20 | ERLIN1   | 95.2  | -0.20 |
| PPM1K      | 99.5  | -0.12 | SCO2     | 100.4 | 0.03  | UNC93B1  | 98.3  | -0.19 | GCH1     | 93.5 | -0.33  | APOL1    | 94.8 | -0.26 | AKT3     | 96.4 | -0.20 | GTPBP2   | 95.2  | -0.20 |
| PKD1       | 99.6  | -0.11 | MT1X     | 100.5 | 0.03  | MX1      | 98.3  | -0.19 | TRIM38   | 93.5 | -0.33  | CCL5     | 94.8 | -0.26 | SERPINB9 | 96.4 | -0.20 | ETV7     | 95.7  | -0.18 |
| FNDC3B     | 99.6  | -0.11 | SP110    | 100.5 | 0.03  | IFI30    | 98.5  | -0.18 | FKBP5    | 93.5 | -0.33  | GBP4     | 95.1 | -0.24 | HLA-G    | 96.4 | -0.20 | DYLN1T1  | 95.7  | -0.18 |
| PMM2       | 99.6  | -0.11 | BAG1     | 100.5 | 0.03  | PTMA     | 98.6  | -0.17 | ELF1     | 93.5 | -0.33  | LGALS9   | 95.1 | -0.24 | B2M      | 96.6 | -0.19 | CCDC109B | 96.0  | -0.17 |
| GCA        | 99.6  | -0.10 | CLEC2B   | 100.6 | 0.04  | PRKD2    | 98.6  | -0.16 | CREB3L3  | 93.9 | -0.31  | GEM      | 95.3 | -0.23 | CD74     | 96.8 | -0.18 | RBCK1    | 96.3  | -0.15 |
| OASL       | 99.7  | -0.09 | MAFF     | 100.7 | 0.04  | EXT1     | 98.7  | -0.15 | FNDC4    | 94.3 | -0.29  | TNFSF10  | 95.3 | -0.23 | GEM      | 96.8 | -0.18 | LINC     | 96.3  | -0.15 |
| GK         | 99.7  | -0.09 | LAP3     | 100.8 | 0.05  | LGALS9   | 98.7  | -0.15 | DDX58    | 94.3 | -0.29  | AKT3     | 95.6 | -0.22 | SLC25A28 | 97.0 | -0.17 | HS2D     | 96.8  | -0.13 |
| IFIT5      | 99.8  | -0.09 | C15orf48 | 100.8 | 0.05  | ARNTL    | 99.0  | -0.13 | LRG1     | 95.0 | -0.25  | TMEM140  | 95.6 | -0.22 | PBEF1    | 97.2 | -0.16 | CYP1B1   | 96.9  | -0.13 |
| cGAS       | 99.8  | -0.08 | NAPA     | 100.9 | 0.06  | CCND3    | 99.0  | -0.12 | C5orf27  | 95.0 | -0.25  | TRAFD1   | 95.6 | -0.22 | CCL19    | 97.2 | -0.16 | TAP1     | 97.2  | -0.12 |
| CCL19      | 99.8  | -0.08 | SLFN5    | 100.9 | 0.06  | GJA4     | 99.1  | -0.11 | LAP3     | 95.0 | -0.25  | MS4A4A   | 95.9 | -0.21 | DEFB1    | 97.4 | -0.15 | TYMP     | 97.3  | -0.11 |
| AQP9       | 99.8  | -0.08 | CES1     | 100.9 | 0.06  | ULK4     | 99.2  | -0.10 | FLJ39739 | 95.4 | -0.24  | PSCD1    | 96.1 | -0.19 | BTN3A3   | 97.6 | -0.14 | IFI27    | 97.5  | -0.10 |
| PNRC1      | 99.8  | -0.08 | PPM1K    | 101.0 | 0.06  | IFI27    | 99.5  | -0.07 | PPM1K    | 95.4 | -0.24  | PNRC1    | 96.1 | -0.19 | CX3CL1   | 97.6 | -0.14 | B2M      | 97.5  | -0.10 |
| WHDC1      | 99.8  | -0.08 | CLEC4D   | 101.1 | 0.07  | BTN3A3   | 99.9  | -0.04 | GK       | 95.7 | -0.22  | PRKD2    | 96.6 | -0.17 | NRN1     | 97.6 | -0.14 | UBE2L6   | 97.9  | -0.09 |
| LGALS3     | 99.9  | -0.07 | PMAIP1   | 101.2 | 0.08  | JUNB     | 100.3 | 0.01  | NT5C3    | 95.7 | -0.22  | MAP3K5   | 96.6 | -0.17 | PCTK2    | 97.7 | -0.13 | AGPAT9   | 98.4  | -0.07 |
| SOCS1      | 99.9  | -0.07 | ADFP     | 101.2 | 0.08  | P2RY6    | 100.4 | 0.02  | LIPA     | 96.1 | -0.20  | CCL8     | 96.6 | -0.17 | LGALS9   | 97.9 | -0.12 | MTHFD2L  | 98.4  | -0.07 |
| SLC25A30   | 99.9  | -0.06 | CYP1B1   | 101.2 | 0.08  | SAMD4A   | 100.5 | 0.03  | GBP3     | 96.1 | -0.20  | HEX3     | 96.9 | -0.15 | ERLIN1   | 98.1 | -0.11 | CLEC4D   | 98.4  | -0.07 |
| CD274      | 100.0 | -0.06 | SERPINB9 | 101.4 | 0.09  | BCL2L14  | 100.6 | 0.04  | C9orf19  | 96.1 | -0.20  | CCDC109B | 96.9 | -0.15 | PFKFB3   | 98.3 | -0.10 | MAP3K5   | 98.8  | -0.05 |
| SECTM1     | 100.0 | -0.06 | EIF3EIP  | 101.4 | 0.09  | DCP1A    | 100.9 | 0.07  | UNC84B   | 96.5 | -0.18  | IFIT5    | 96.9 | -0.15 | ULK4     | 98.3 | -0.10 | GPX2     | 98.9  | -0.04 |
| MSR1       | 100.0 | -0.05 | SERPINE1 | 101.5 | 0.10  | OASL     | 101.1 | 0.09  | GZMB     | 96.5 | -0.18  | ETV6     | 96.9 | -0.15 | IL15     | 98.5 | -0.08 | ARNTL    | 99.4  | -0.03 |
| IL1RN      | 100.1 | -0.04 | DDIT4    | 101.5 | 0.10  | SCO2     | 101.1 | 0.09  | PMAIP1   | 96.5 | -0.18  | CCL2     | 96.9 | -0.15 | NDC80    | 98.5 | -0.08 | IFI27    | 99.5  | -0.02 |
| MAB21L2    | 100.1 | -0.04 | MT1G     | 101.6 | 0.10  | TMEM49   | 101.1 | 0.09  | TREX1    | 96.8 | -0.16  | IFI6     | 97.2 | -0.14 | IL28RA   | 98.5 | -0.08 | LGALS9   | 100.0 | 0.00  |
| ELF1       | 100.1 | -0.04 | NRN1     | 101.6 | 0.10  | APOL2    | 101.2 | 0.10  | SLC15A3  | 96.8 | -0.16  | MX1      | 97.4 | -0.13 | EPAS1    | 98.7 | -0.07 | ATF3     | 100.1 | 0.00  |
| GTPBP2     | 100.1 | -0.04 | SLC25A28 | 101.7 | 0.11  | RARRES3  | 101.4 | 0.12  | GBP2     | 96.8 | -0.16  | HLA-C    | 97.4 | -0.13 | PRAME    | 98.7 | -0.07 | GBP2     | 100.2 | 0.01  |
| CTCF       | 100.2 | -0.04 | ISG15    | 101.7 | 0.11  | HESX1    | 101.6 | 0.14  | WHDC1    | 96.8 | -0.16  | NMI      | 97.7 | -0.12 | S100A8   | 98.7 | -0.07 | AHNAK2   | 100.2 | 0.01  |
| MT1G       | 100.2 | -0.03 | ZNF313   | 101.8 | 0.12  | SNN      | 101.7 | 0.15  | IFIT1    | 96.8 | -0.16  | IFI6     | 97.7 | -0.12 | MT1H     | 98.7 | -0.07 | NPAS2    | 100.4 | 0.02  |
| ALDH1A1    | 100.3 | -0.02 | SERP     |       |       |          |       |       |          |      |        |          |      |       |          |      |       |          |       |       |

| VV<br>Gene | PV<br>Gene |      | CVB<br>Gene |       | EAV<br>Gene |          | SINV-G<br>Gene |      | SINV-A<br>Gene |       | ONNV<br>Gene |          |       |       |          |       |       |          |       |      |
|------------|------------|------|-------------|-------|-------------|----------|----------------|------|----------------|-------|--------------|----------|-------|-------|----------|-------|-------|----------|-------|------|
|            | Rep        | Z    | Rep         | Z     | Rep         | Z        | Rep            | Z    | Rep            | Z     | Rep          | Z        |       |       |          |       |       |          |       |      |
| MICB       | 100.6      | 0.03 | STEAP4      | 102.4 | 0.16        | PHF11    | 103.2          | 0.29 | FLT1           | 99.8  | -0.02        | IL17RB   | 99.5  | -0.03 | GK       | 99.9  | -0.01 | NCOA3    | 104.9 | 0.20 |
| CXCL9      | 100.7      | 0.03 | IL1RN       | 102.4 | 0.16        | COMMD3   | 103.2          | 0.29 | SPSB1          | 100.2 | 0.00         | SP110    | 99.5  | -0.03 | LMO2     | 100.1 | 0.00  | CCDC92   | 105.0 | 0.21 |
| FLJ39739   | 100.7      | 0.03 | FUT4        | 102.5 | 0.16        | ANKRD22  | 103.2          | 0.29 | SECTM1         | 100.2 | 0.00         | CCDC75   | 99.5  | -0.03 | EIF2AK2  | 100.1 | 0.00  | MCL1     | 105.2 | 0.22 |
| ETV7       | 100.7      | 0.03 | GCA         | 102.5 | 0.17        | CHMP5    | 103.3          | 0.31 | RAB27A         | 100.2 | 0.00         | WARS     | 99.5  | -0.03 | LY6E     | 100.3 | 0.01  | C15orf48 | 105.6 | 0.23 |
| THBD       | 100.8      | 0.04 | CEBPD       | 102.5 | 0.17        | TLR3     | 103.4          | 0.31 | MT1G           | 100.5 | 0.02         | TRIM34   | 99.8  | -0.01 | GBP2     | 100.3 | 0.01  | AQP9     | 105.6 | 0.23 |
| LMO2       | 100.8      | 0.05 | OGFR        | 102.5 | 0.17        | CRP      | 103.4          | 0.32 | FAM46A         | 100.5 | 0.02         | MARCKS   | 99.8  | -0.01 | HS2D     | 100.3 | 0.01  | PKFMB3   | 105.6 | 0.23 |
| CLEC4D     | 100.9      | 0.06 | PML         | 102.6 | 0.17        | C4orf32  | 103.4          | 0.32 | NRN1           | 100.9 | 0.04         | CLEC2B   | 99.8  | -0.01 | UBE2L6   | 100.3 | 0.01  | TNFAIP3  | 105.6 | 0.23 |
| ABTB2      | 100.9      | 0.06 | SAT3        | 102.7 | 0.18        | BATF2    | 103.5          | 0.32 | FLJ23556       | 100.9 | 0.04         | CD163    | 99.8  | -0.01 | CCL4     | 100.3 | 0.01  | JA2      | 105.6 | 0.23 |
| CD74       | 100.9      | 0.06 | IFIT1       | 102.7 | 0.18        | NUP50    | 103.5          | 0.32 | LY6E           | 100.9 | 0.04         | IL15RA   | 100.0 | 0.00  | SP110    | 100.6 | 0.04  | S100A8   | 105.9 | 0.25 |
| COMMD3     | 100.9      | 0.07 | GAK         | 102.8 | 0.18        | ANGPTL1  | 103.7          | 0.34 | IF144L         | 100.9 | 0.04         | TAP1     | 100.0 | 0.00  | C10orf10 | 100.6 | 0.04  | IFI6     | 105.9 | 0.25 |
| LGMN       | 101.0      | 0.07 | LINC        | 102.8 | 0.18        | KIAA0040 | 103.8          | 0.35 | C22orf28       | 101.3 | 0.06         | TRIM21   | 100.0 | 0.00  | GPX2     | 100.6 | 0.04  | CX3CL1   | 106.0 | 0.25 |
| SAT3       | 101.0      | 0.07 | IF130       | 102.9 | 0.19        | RTP4     | 103.8          | 0.35 | CMAH           | 101.3 | 0.06         | PHF15    | 100.0 | 0.00  | VEGFC    | 100.6 | 0.04  | C4orf32  | 106.0 | 0.25 |
| ARG2       | 101.0      | 0.07 | PHF11       | 102.9 | 0.19        | CD38     | 103.9          | 0.37 | AHNAK2         | 101.3 | 0.06         | IFITM2   | 100.3 | 0.01  | LGALS3   | 100.6 | 0.04  | ADFP     | 106.2 | 0.26 |
| GTPBP1     | 101.0      | 0.08 | PBEF1       | 102.9 | 0.19        | MS4A4A   | 104.1          | 0.39 | SERPINE1       | 101.6 | 0.08         | PADI2    | 100.6 | 0.03  | CXCL10   | 100.8 | 0.05  | UPP2     | 106.2 | 0.26 |
| SSBP3      | 101.1      | 0.09 | FNDCA4      | 102.9 | 0.19        | CCL4     | 104.2          | 0.39 | CCL5           | 101.6 | 0.08         | GBP3     | 100.8 | 0.04  | CCL5     | 100.8 | 0.05  | GK       | 106.2 | 0.26 |
| LAP3       | 101.1      | 0.09 | CXCL10      | 103.0 | 0.20        | PLSCR1   | 104.2          | 0.39 | JUNB           | 101.6 | 0.08         | SAMHD1   | 100.8 | 0.04  | NUP50    | 101.0 | 0.06  | ABLIM3   | 106.3 | 0.26 |
| INDO       | 101.2      | 0.10 | OAS2        | 103.0 | 0.20        | G6PC     | 104.2          | 0.40 | NUP50          | 101.6 | 0.08         | EIF3EIP  | 100.8 | 0.04  | PI4K2B   | 101.0 | 0.06  | C10orf10 | 106.3 | 0.26 |
| C5orf27    | 101.3      | 0.11 | PNRC1       | 103.0 | 0.20        | PMM2     | 104.3          | 0.40 | CDKN1A         | 101.6 | 0.08         | TMEM49   | 100.8 | 0.04  | P2RY6    | 101.2 | 0.07  | ETV6     | 106.3 | 0.26 |
| VEGFC      | 101.3      | 0.12 | MT1M        | 103.0 | 0.20        | OAS2     | 104.3          | 0.40 | ISG15          | 102.0 | 0.10         | BATF2    | 100.8 | 0.04  | PLEKHA4  | 101.2 | 0.07  | G6PC     | 106.5 | 0.27 |
| PARP12     | 101.3      | 0.12 | GPX2        | 103.0 | 0.20        | GCH1     | 104.6          | 0.43 | HEG1           | 102.0 | 0.10         | LINC     | 100.8 | 0.04  | FLJ23556 | 101.2 | 0.07  | DNAPT6   | 105.6 | 0.27 |
| HLA-E      | 101.4      | 0.12 | ZNF385B     | 103.0 | 0.20        | BLVRA    | 104.6          | 0.43 | LINC           | 102.4 | 0.11         | ANKRD22  | 101.1 | 0.05  | SLC16A1  | 101.4 | 0.08  | FBXO6    | 106.6 | 0.28 |
| ERLIN1     | 101.4      | 0.12 | BATF2       | 103.1 | 0.20        | FCGR1A   | 104.6          | 0.43 | PRAME          | 102.4 | 0.11         | HS2D     | 101.1 | 0.05  | PDGFR    | 101.4 | 0.08  | DUSP5    | 106.9 | 0.29 |
| CYP11B1    | 101.4      | 0.12 | IL15        | 103.1 | 0.20        | CREB3L3  | 104.7          | 0.44 | SERPING1       | 102.4 | 0.11         | CD38     | 101.1 | 0.05  | IFI30    | 101.6 | 0.09  | TRAFD1   | 107.1 | 0.29 |
| PDGFRL     | 101.4      | 0.12 | C5orf27     | 103.1 | 0.20        | ALDH1A1  | 104.7          | 0.44 | ADAMDEC1       | 102.4 | 0.11         | CD74     | 101.1 | 0.05  | MT1F     | 101.6 | 0.09  | TRIM34   | 107.2 | 0.30 |
| APOL2      | 101.4      | 0.13 | LGALS3      | 103.1 | 0.20        | FAM125B  | 104.8          | 0.45 | WARS           | 102.4 | 0.11         | IL1R     | 101.6 | 0.08  | FBXO6    | 102.0 | 0.11  | ISG20    | 107.2 | 0.30 |
| TRIM34     | 101.5      | 0.14 | CCL19       | 103.1 | 0.21        | SP110    | 104.8          | 0.46 | TRAFD1         | 102.4 | 0.11         | ERLIN1   | 101.6 | 0.08  | DCP1A    | 102.0 | 0.11  | CCL19    | 107.4 | 0.31 |
| GCH1       | 101.6      | 0.15 | KIAA1618    | 103.2 | 0.21        | SPITLC2  | 104.9          | 0.46 | DCP1A          | 102.4 | 0.11         | IFIT3    | 101.6 | 0.08  | RNF19B   | 102.0 | 0.11  | HLA-G    | 107.9 | 0.33 |
| CCDC109B   | 101.6      | 0.16 | B2M         | 103.2 | 0.21        | TAGAP    | 104.9          | 0.46 | IFI30          | 102.8 | 0.13         | PM2AIP1  | 101.6 | 0.08  | ARNTL    | 102.2 | 0.12  | KIAA0040 | 108.1 | 0.34 |
| IFI44      | 101.7      | 0.17 | FAM125B     | 103.2 | 0.21        | IFIT3    | 104.9          | 0.46 | ETV7           | 102.8 | 0.13         | GPX2     | 101.6 | 0.08  | RBCK1    | 102.2 | 0.12  | ELF1     | 108.1 | 0.34 |
| DHX58      | 101.8      | 0.18 | C22orf28    | 103.2 | 0.21        | FBXO6    | 104.9          | 0.46 | STAT1          | 102.8 | 0.13         | MT1G     | 102.1 | 0.10  | RARRES3  | 102.2 | 0.12  | C4orf33  | 108.2 | 0.34 |
| NMI        | 101.8      | 0.18 | CD80        | 103.2 | 0.21        | CCL5     | 104.9          | 0.46 | CCDC75         | 102.8 | 0.13         | C4orf33  | 102.4 | 0.12  | CYP11B1  | 102.2 | 0.12  | KIAA0082 | 108.4 | 0.35 |
| CD38       | 101.9      | 0.19 | ANKRD22     | 103.2 | 0.21        | CTCF     | 104.9          | 0.47 | GAK            | 103.1 | 0.15         | SAA1     | 102.4 | 0.12  | MT1M     | 102.2 | 0.12  | ATP10D   | 108.4 | 0.35 |
| CE51       | 101.9      | 0.19 | PUS1        | 103.3 | 0.22        | CXCL11   | 105.1          | 0.48 | C10orf10       | 103.1 | 0.15         | MT1H     | 102.4 | 0.12  | MT1G     | 102.2 | 0.12  | VAMP5    | 108.5 | 0.35 |
| UPP2       | 101.9      | 0.19 | IFI35       | 103.3 | 0.22        | PCTK2    | 105.1          | 0.48 | IFIT5          | 103.1 | 0.15         | PCTK2    | 102.7 | 0.13  | SERPING1 | 102.4 | 0.13  | GLRX     | 108.7 | 0.36 |
| MX1        | 101.9      | 0.19 | CXCL11      | 103.3 | 0.22        | CDKN1A   | 105.1          | 0.48 | IL17RB         | 103.1 | 0.15         | GMPT     | 102.7 | 0.13  | WARS     | 102.4 | 0.13  | USP18    | 109.1 | 0.38 |
| TAP1       | 101.9      | 0.19 | PLSCR1      | 103.3 | 0.22        | KIAA1618 | 105.1          | 0.48 | INDO           | 103.1 | 0.15         | LEPR     | 102.9 | 0.14  | PNRC1    | 102.4 | 0.13  | GEM      | 109.2 | 0.38 |
| TNSF13B    | 101.9      | 0.19 | GTPBP1      | 103.3 | 0.22        | CD274    | 105.1          | 0.48 | NFIL3          | 103.1 | 0.15         | VEGFC    | 103.2 | 0.15  | PRKCD1   | 102.6 | 0.14  | RAB27A   | 109.4 | 0.39 |
| APOL1      | 101.9      | 0.19 | TNSF13B     | 103.3 | 0.22        | GMPT     | 105.1          | 0.48 | PCTK3          | 103.1 | 0.15         | ABTB2    | 103.5 | 0.17  | EPST11   | 102.6 | 0.14  | PSCD1    | 109.4 | 0.39 |
| FAM70A     | 102.0      | 0.20 | VEGFC       | 103.4 | 0.22        | SLC25A28 | 105.1          | 0.48 | GTPBP1         | 103.5 | 0.17         | TNSF13B  | 103.5 | 0.17  | GBP1     | 102.8 | 0.16  | FKBP5    | 109.8 | 0.41 |
| SPITLC2    | 102.0      | 0.20 | LRG1        | 103.4 | 0.22        | GEM      | 105.3          | 0.50 | ANGPTL1        | 103.5 | 0.17         | TNFAIP6  | 103.5 | 0.17  | OASL     | 102.8 | 0.16  | CD38     | 110.1 | 0.42 |
| C9orf91    | 102.0      | 0.20 | FLJ39739    | 103.4 | 0.22        | GK       | 105.3          | 0.51 | SIRPA          | 103.9 | 0.19         | C10orf10 | 103.5 | 0.17  | CD80     | 102.8 | 0.16  | MX2      | 110.1 | 0.42 |
| MCOLN2     | 102.0      | 0.21 | MCL1        | 103.6 | 0.24        | MCL1     | 105.4          | 0.51 | FBXO6          | 103.9 | 0.19         | NDC80    | 103.7 | 0.18  | SAA1     | 102.8 | 0.16  | FAM46A   | 110.3 | 0.43 |
| TMEM49     | 102.1      | 0.21 | MTHFD2L     | 103.6 | 0.24        | PRIC285  | 105.4          | 0.51 | SOCS1          | 103.9 | 0.19         | STEAP4   | 103.7 | 0.18  | IMPA2    | 103.0 | 0.17  | EPAS1    | 110.4 | 0.43 |
| MCL1       | 102.1      | 0.22 | ADM         | 103.6 | 0.24        | ADFP     | 105.4          | 0.51 | ZNF295         | 103.9 | 0.19         | OPTN     | 103.7 | 0.18  | CCDC75   | 103.2 | 0.18  | GBP1     | 110.5 | 0.44 |
| CXCL10     | 102.1      | 0.22 | MT1F        | 103.6 | 0.24        | IFITM3   | 105.4          | 0.51 | MT1H           | 104.2 | 0.21         | ARNTL    | 104.0 | 0.19  | PHF11    | 103.2 | 0.18  | IL6ST    | 110.5 | 0.44 |
| SLC15A3    | 102.2      | 0.23 | TMEM51      | 103.6 | 0.24        | SOCS1    | 105.4          | 0.51 | PHF15          | 104.2 | 0.21         | S100A8   | 104.0 | 0.19  | ZNF385B  | 103.2 | 0.18  | MSR1     | 110.7 | 0.44 |
| IL1R       | 102.2      | 0.23 | TIMP1       | 103.6 | 0.24        | RNASE4   | 105.4          | 0.51 | MAFF           | 104.2 | 0.21         | IFI30    | 104.0 | 0.19  | BCL3     | 103.4 | 0.19  | CRY1     | 110.8 | 0.45 |
| CD9        | 102.3      | 0.24 | DYNLT1      | 103.6 | 0.24        | SAT3     | 105.5          | 0.52 | ARNTL          | 104.2 | 0.21         | AXUD1    | 104.2 | 0.20  | CNP      | 103.4 | 0.19  | ULK4     | 111.0 | 0.46 |
| SAMHD1     | 102.3      | 0.24 | CDKN1A      | 103.6 | 0.24        | PSMB8    | 105.5          | 0.52 | RPL22          | 104.2 | 0.21         | PRAME    | 104.2 | 0.20  | PM2AIP1  | 103.6 | 0.20  | CXCL10   | 111.3 | 0.47 |
| AHNAK2     | 102.4      | 0.25 | LGMN        | 103.6 | 0.24        | MTHFD2L  | 105.5          | 0.52 | IFITM3         | 104.6 | 0.22         | CXCL9    | 104.2 | 0.20  | ARG2     | 103.6 | 0.20  | EPST11   | 111.3 | 0.47 |
| IL17RB     | 102.4      | 0.26 | CMAH        | 103.6 | 0.24        | PLEKHA4  | 105.6          | 0.53 | IFI35          | 104.6 | 0.22         | BAG1     | 104.2 | 0.20  | BATF2    | 103.7 | 0.21  | IRF9     | 111.3 | 0.47 |
| PXK        | 102.4      | 0.26 | CCL4        | 103.6 | 0.24        | GBP5     | 105.6          | 0.53 | APOL2          | 104.6 | 0.22         | OAS2     | 104.5 | 0.22  | C22orf28 | 103.7 | 0.21  | CCL4     | 111.3 | 0.47 |
| TCF7L2     | 102.4      | 0.26 | BTNGA3      | 103.6 | 0.24        | DHX58    | 105.6          | 0.53 | CRY1           | 104.6 | 0.22         | CTCF     | 104.5 | 0.22  | C1S      | 103.9 | 0.22  | SAMHD1   | 111.4 | 0.48 |
| CCDC75     | 102.5      | 0.27 | GZMB        | 103.6 | 0.24        | MT1X     | 105.6          | 0.53 | PI4K2B         | 105.0 | 0.24         | BCL2L14  | 104.5 | 0.22  | SNN      | 104.1 | 0.23  | PUS1     | 111.6 | 0.48 |
| MAP3K5     | 102.5      | 0.27 | PKD1        | 103.6 | 0.24        | GBP1     | 105.6          | 0.54 | ETV6           | 105.0 | 0.24         | ULK4     | 104.5 | 0.22  | PHF15    | 104.1 | 0.23  | PSMB9    | 111.8 | 0.49 |
| DX3L       | 102.5      | 0.27 | TMEM49      | 103.8 | 0.25        | IRF7     | 105.6          | 0.54 | EPST11         | 105.0 | 0.24         | USP18    | 104.5 | 0.22  | GTPBP1   | 104.1 | 0.23  | OASL     | 118.8 | 0.49 |
| IFITM3     | 102.5      | 0.28 | S100A8      | 103.8 | 0.25        | SAA1     | 105.7          | 0.54 | NCOA3          | 105.0 | 0.24         | CCND3    | 104.5 | 0.22  | TNFAIP3  | 104.1 | 0.23  | PML      | 112.0 | 0.50 |
| PUS1       | 102.6      | 0.28 | HLA-C       | 103.8 | 0.25        | CMAH     | 105.7          | 0.54 | SMAD3          | 105.3 | 0.26         | C5orf27  | 104.5 | 0.22  | STEAP4   | 104.1 | 0.23  | OPTN     | 112.0 | 0.50 |
| SLFN5      | 102.6      | 0.29 | CRP         | 103.8 | 0.25        | CASP7    | 105.7          | 0.55 | USP18          | 105.7 | 0.28         | COMMD3   | 105.0 | 0.24  | G6PC     | 104.3 | 0.24  | CCL5     | 112.0 | 0.50 |
| G6PC       | 102.6      | 0.29 | CXCL9       | 104.0 | 0.26        | HLA-G    | 105.8          | 0.55 | BAG1           | 105.7 | 0.28         | C9orf19  | 105.0 | 0.24  | ETV6     | 104.3 | 0.24  | PSMB8    | 112.1 | 0.51 |
| IFI27      | 102.7      | 0.30 | PLEKHA4     | 104.0 | 0.26        | UPP2     | 105.8          | 0.55 | PLEKHA4        | 105.7 | 0.28         | NFIL3    | 105.0 | 0.24  | RPL22    | 104.7 | 0.26  | SAT3     | 112.1 | 0.51 |
| PNPT1      | 102.8      | 0.30 | CD74        | 104.0 | 0.27        | CRY1     | 105.9          | 0.56 | TRIM5          | 105.7 | 0.28         | GLRX     | 105.0 | 0.24  | SERPINE1 | 104.7 | 0.26  | PARP12   | 112.3 | 0.51 |
| BATF2      | 1          |      |             |       |             |          |                |      |                |       |              |          |       |       |          |       |       |          |       |      |

| VV<br>Gene | PV<br>Gene |      | CVB<br>Gene |       | EAV<br>Gene |          | SINV-G<br>Gene |      | SINV-A<br>Gene |       | ONNV<br>Gene |          |       |      |         |       |      |          |       |      |
|------------|------------|------|-------------|-------|-------------|----------|----------------|------|----------------|-------|--------------|----------|-------|------|---------|-------|------|----------|-------|------|
|            | Rep        | Z    | Rep         | Z     | Rep         | Z        | Rep            | Z    | Rep            | Z     | Rep          | Z        |       |      |         |       |      |          |       |      |
| BUB1       | 103.6      | 0.41 | HPSE        | 105.1 | 0.34        | SECTM1   | 106.6          | 0.63 | COMMD3         | 108.7 | 0.43         | PFKFB3   | 107.4 | 0.36 | TRIM38  | 106.5 | 0.36 | PLEKHA4  | 115.6 | 0.65 |
| CASP1      | 103.6      | 0.42 | CD69        | 105.3 | 0.35        | NMI      | 106.6          | 0.63 | FND3B          | 108.7 | 0.43         | CX3CL1   | 107.6 | 0.37 | CREB3L3 | 106.5 | 0.36 | CTCF     | 115.6 | 0.65 |
| C10orf10   | 103.7      | 0.42 | MS4A4A      | 105.3 | 0.35        | STAR5    | 106.6          | 0.63 | TCF7L2         | 108.7 | 0.43         | KIAA0082 | 107.9 | 0.38 | NAPA    | 106.5 | 0.36 | FND3B    | 115.6 | 0.65 |
| PM1P1      | 103.7      | 0.42 | CHMP5       | 105.4 | 0.36        | EIF3EIP  | 106.7          | 0.64 | HLA-E          | 109.0 | 0.44         | XAF1     | 108.2 | 0.40 | GLRX    | 106.6 | 0.37 | TDRD7    | 115.8 | 0.66 |
| CHMP5      | 103.7      | 0.43 | GLRX        | 105.4 | 0.36        | CXCL10   | 106.7          | 0.64 | PFKFB3         | 109.0 | 0.44         | FKBP5    | 108.2 | 0.40 | FKBP5   | 106.8 | 0.38 | ABTB2    | 116.1 | 0.67 |
| CD80       | 103.7      | 0.43 | GEM         | 105.4 | 0.36        | WARS     | 106.8          | 0.65 | CLEC4E         | 109.0 | 0.44         | DEFB1    | 108.2 | 0.40 | TNFSF10 | 106.8 | 0.38 | CPT1A    | 116.2 | 0.67 |
| IL6ST      | 103.7      | 0.43 | CCL5        | 105.6 | 0.37        | GBP2     | 106.8          | 0.65 | LGALS9         | 109.8 | 0.48         | OAS1     | 108.2 | 0.40 | TMEM49  | 106.8 | 0.38 | BCL2L14  | 116.2 | 0.67 |
| MS4A4A     | 103.7      | 0.43 | SAA1        | 105.6 | 0.37        | EPAS1    | 106.8          | 0.65 | CD9            | 109.8 | 0.48         | LY6E     | 108.4 | 0.41 | SCD2    | 106.8 | 0.38 | HERC6    | 116.3 | 0.68 |
| CFB        | 103.8      | 0.44 | PADI2       | 105.6 | 0.37        | CCDC75   | 106.8          | 0.66 | SCD2           | 109.8 | 0.48         | APOL2    | 108.4 | 0.41 | SPTLC2  | 107.0 | 0.39 | MT1X     | 116.5 | 0.69 |
| AMPH       | 103.9      | 0.45 | TRIM5       | 105.7 | 0.38        | CCDC109B | 106.9          | 0.66 | BTN3A3         | 110.1 | 0.50         | IFI44L   | 108.4 | 0.41 | CLEC2B  | 107.0 | 0.39 | STAP4    | 116.6 | 0.69 |
| HESX1      | 103.9      | 0.45 | ABTB2       | 105.7 | 0.38        | INDO     | 106.9          | 0.66 | CX3CL1         | 110.1 | 0.50         | PCTK3    | 108.4 | 0.41 | DUSP5   | 107.4 | 0.42 | TNFSF10  | 116.6 | 0.69 |
| PLEKHA4    | 104.0      | 0.46 | RAB27A      | 105.7 | 0.38        | CLEC4E   | 106.9          | 0.66 | FAM134B        | 110.5 | 0.52         | IL15     | 108.7 | 0.42 | HEG1    | 107.4 | 0.42 | PCTK3    | 116.6 | 0.69 |
| C4orf33    | 104.2      | 0.49 | RPL22       | 105.7 | 0.38        | TRIM38   | 106.9          | 0.66 | PSCD1          | 110.5 | 0.52         | CXCL11   | 109.0 | 0.44 | DYNLT1  | 107.4 | 0.42 | PRAME    | 116.8 | 0.70 |
| OAS3       | 104.2      | 0.49 | PRKD2       | 105.7 | 0.38        | CD74     | 106.9          | 0.67 | CEBPD          | 110.9 | 0.54         | NUP50    | 109.0 | 0.44 | BUB1    | 107.4 | 0.42 | IFIT3    | 117.2 | 0.72 |
| TDRD7      | 104.3      | 0.50 | PRAME       | 105.7 | 0.38        | ISG15    | 107.0          | 0.67 | SSBP3          | 110.9 | 0.54         | ARG2     | 109.0 | 0.44 | STAP1   | 107.4 | 0.42 | IFI44    | 117.4 | 0.72 |
| PCTK2      | 104.3      | 0.50 | PXK         | 105.8 | 0.39        | C2orf31  | 107.1          | 0.68 | TNFAIP6        | 110.9 | 0.54         | TFEC     | 109.0 | 0.44 | PSCD1   | 108.2 | 0.46 | CD163    | 117.4 | 0.72 |
| TNFSF10    | 104.3      | 0.51 | PI4K2B      | 105.9 | 0.39        | SOCS2    | 107.1          | 0.68 | BLVRA          | 111.3 | 0.55         | EPST11   | 109.2 | 0.45 | C4orf33 | 108.2 | 0.46 | CD69     | 117.7 | 0.73 |
| PRAME      | 104.3      | 0.51 | C10orf10    | 106.0 | 0.40        | B2M      | 107.1          | 0.68 | GLRX           | 111.3 | 0.55         | SAT3     | 109.5 | 0.46 | CCNA1   | 108.2 | 0.46 | ANKRD22  | 117.7 | 0.73 |
| MT1X       | 104.4      | 0.51 | CREB3L3     | 106.0 | 0.40        | PSCD1    | 107.1          | 0.68 | SOCS2          | 111.3 | 0.55         | MT1F     | 109.7 | 0.47 | UNC84B  | 108.4 | 0.47 | CASP7    | 117.9 | 0.75 |
| OPTN       | 104.4      | 0.52 | CCR1        | 106.0 | 0.40        | LY6E     | 107.1          | 0.68 | ULK4           | 111.3 | 0.55         | GBP1     | 110.0 | 0.49 | PADI2   | 108.6 | 0.48 | GJA4     | 118.1 | 0.75 |
| SAMD4A     | 104.4      | 0.52 | KIAA0082    | 106.1 | 0.40        | PBEF1    | 107.3          | 0.70 | SCARB2         | 111.3 | 0.55         | PBEF1    | 110.0 | 0.49 | GCA     | 108.8 | 0.49 | CD274    | 118.2 | 0.76 |
| KIAA1618   | 104.4      | 0.52 | TAGAP       | 106.2 | 0.41        | PKD1     | 107.3          | 0.70 | S100A8         | 111.6 | 0.57         | HEG1     | 110.0 | 0.49 | IFIT1   | 108.8 | 0.49 | CRP      | 118.2 | 0.76 |
| HEG1       | 104.6      | 0.54 | TXNIP       | 106.3 | 0.42        | AXUD1    | 107.3          | 0.70 | CD69           | 111.6 | 0.57         | HLA-E    | 110.0 | 0.49 | IFI6    | 108.8 | 0.49 | PCTK2    | 118.2 | 0.76 |
| JUNB       | 104.6      | 0.54 | RNASE4      | 106.3 | 0.42        | PML      | 107.3          | 0.71 | PUS1           | 112.0 | 0.59         | SSBP3    | 110.3 | 0.50 | MYD88   | 108.8 | 0.49 | NFIL3    | 118.2 | 0.76 |
| TAGAP      | 104.6      | 0.55 | VAMP5       | 106.4 | 0.42        | PUS1     | 107.3          | 0.71 | PNRC1          | 112.4 | 0.61         | DUSP5    | 110.3 | 0.50 | SLFN5   | 109.0 | 0.50 | B4GALT5  | 118.2 | 0.76 |
| HLA-F      | 104.7      | 0.56 | WARS        | 106.6 | 0.44        | TYMP     | 107.4          | 0.71 | CRP            | 112.4 | 0.61         | FLJ23556 | 110.3 | 0.50 | ABLIM3  | 109.0 | 0.50 | SLC16A1  | 118.4 | 0.76 |
| HES4       | 104.7      | 0.56 | CTCF        | 106.6 | 0.44        | SAMHD1   | 107.4          | 0.71 | DHX58          | 112.4 | 0.61         | DCP1A    | 110.8 | 0.53 | TBX3    | 109.0 | 0.50 | TNFAIP6  | 118.4 | 0.76 |
| RPL22      | 104.8      | 0.57 | SPSB1       | 106.6 | 0.44        | GZMB     | 107.4          | 0.71 | SLFN5          | 112.4 | 0.61         | PMM2     | 111.0 | 0.54 | DDX3X   | 109.0 | 0.50 | MARCKS   | 118.4 | 0.76 |
| BCL2L14    | 104.8      | 0.57 | HEG1        | 106.7 | 0.44        | CES1     | 107.4          | 0.71 | ANKRD22        | 112.4 | 0.61         | FER1L3   | 111.0 | 0.54 | VAMP5   | 109.0 | 0.50 | PRIC285  | 118.5 | 0.77 |
| KIAA0082   | 104.8      | 0.57 | B4GALT5     | 106.9 | 0.46        | ISG20    | 107.4          | 0.71 | CD274          | 112.4 | 0.61         | ATP10D   | 111.3 | 0.55 | TRIM34  | 109.2 | 0.51 | GBP4     | 118.5 | 0.77 |
| CCL5       | 104.9      | 0.58 | CPT1A       | 107.0 | 0.46        | PPM1K    | 107.5          | 0.72 | CD80           | 112.4 | 0.61         | PXK      | 111.6 | 0.56 | TRIM21  | 109.4 | 0.53 | DHX58    | 118.7 | 0.78 |
| GJA4       | 104.9      | 0.58 | NUP50       | 107.2 | 0.48        | PXK      | 107.6          | 0.73 | BLZF1          | 112.4 | 0.61         | RGS1     | 111.8 | 0.58 | AXUD1   | 109.4 | 0.53 | RARRES3  | 118.7 | 0.78 |
| CEBPD      | 104.9      | 0.59 | HESX1       | 107.2 | 0.48        | CCL2     | 107.6          | 0.73 | IGFBP2         | 112.7 | 0.63         | PI4K2B   | 111.8 | 0.58 | USP18   | 109.4 | 0.53 | NUP50    | 118.8 | 0.78 |
| MAFB       | 105.0      | 0.59 | PTMA        | 107.4 | 0.49        | XAF1     | 107.6          | 0.73 | SLC25A30       | 112.7 | 0.63         | IFI16    | 111.8 | 0.58 | RTP4    | 109.4 | 0.53 | PDGFRL   | 119.1 | 0.80 |
| TLR3       | 105.1      | 0.61 | PSMB9       | 107.5 | 0.50        | ETV7     | 107.7          | 0.74 | PDGFRL         | 113.1 | 0.65         | ARHGFE3  | 112.1 | 0.59 | IFNGR1  | 109.7 | 0.55 | KIAA1618 | 119.2 | 0.80 |
| SP110      | 105.2      | 0.62 | AQP9        | 107.8 | 0.52        | FAM70A   | 107.7          | 0.74 | KIAA0082       | 113.1 | 0.65         | FAM125B  | 112.4 | 0.60 | FAM46A  | 109.9 | 0.56 | XAF1     | 119.2 | 0.80 |
| WARS       | 105.2      | 0.62 | SLC16A1     | 107.9 | 0.53        | IFIT5    | 107.7          | 0.74 | BATF2          | 113.5 | 0.66         | SPTLC2   | 112.6 | 0.62 | C9orf19 | 109.5 | 0.56 | RNASE4   | 119.2 | 0.80 |
| CXCL11     | 105.2      | 0.62 | SPTLC2      | 107.9 | 0.53        | LINC1    | 107.7          | 0.74 | TRIM34         | 113.5 | 0.66         | TCF7L2   | 112.6 | 0.62 | CRP     | 109.9 | 0.56 | NDC80    | 119.4 | 0.81 |
| VAMP5      | 105.2      | 0.63 | SOCS1       | 108.0 | 0.53        | UBE2L6   | 107.8          | 0.75 | AGPAT9         | 113.8 | 0.68         | MAFF     | 112.6 | 0.62 | SAMHD1  | 110.1 | 0.57 | CMAH     | 119.5 | 0.81 |
| GBP4       | 105.2      | 0.63 | CRY1        | 108.0 | 0.53        | PFKFB3   | 107.8          | 0.75 | TAGAP          | 113.8 | 0.68         | ADAMDEC1 | 112.9 | 0.63 | NFIL3   | 110.1 | 0.57 | MX1      | 119.8 | 0.83 |
| TAF2       | 105.3      | 0.64 | PDGFRL      | 108.1 | 0.54        | GTPBP2   | 107.8          | 0.75 | IL15RA         | 113.8 | 0.68         | RNF19B   | 112.9 | 0.63 | STAT1   | 110.1 | 0.57 | SAA1     | 120.0 | 0.83 |
| NDC80      | 105.4      | 0.64 | MAB21L2     | 108.2 | 0.55        | LMO2     | 107.9          | 0.76 | CTCF           | 114.6 | 0.72         | PDK1     | 113.1 | 0.64 | LIPA    | 110.3 | 0.58 | TNFSF13B | 120.8 | 0.87 |
| ABCA9      | 105.4      | 0.65 | C4orf32     | 108.5 | 0.56        | SERPINE1 | 107.9          | 0.76 | HERC6          | 114.6 | 0.72         | BUB1     | 113.1 | 0.64 | RNASE4  | 110.5 | 0.59 | PHF15    | 121.0 | 0.87 |
| DEFB1      | 105.4      | 0.65 | SNN         | 108.5 | 0.56        | S100A8   | 108.0          | 0.77 | XAF1           | 114.6 | 0.72         | NAPA     | 113.4 | 0.65 | APOL2   | 110.5 | 0.59 | NAPA     | 121.0 | 0.87 |
| OAS2       | 105.7      | 0.69 | CFB         | 108.6 | 0.57        | DEFB1    | 108.1          | 0.78 | HLA-G          | 115.0 | 0.74         | C9orf91  | 113.4 | 0.65 | HK2     | 110.5 | 0.59 | ALDH1A1  | 121.3 | 0.89 |
| HLA-G      | 106.0      | 0.73 | HLA-G       | 108.7 | 0.58        | SERPINB9 | 108.1          | 0.78 | RARRES3        | 115.0 | 0.74         | C15orf48 | 113.7 | 0.67 | IL1R    | 110.7 | 0.60 | HESX1    | 121.3 | 0.89 |
| DCP1A      | 106.1      | 0.74 | MSR1        | 108.7 | 0.58        | DYNLT1   | 108.1          | 0.78 | MSR1           | 115.3 | 0.76         | APOL6    | 113.7 | 0.67 | SIRPA   | 110.7 | 0.60 | PNRC1    | 121.4 | 0.89 |
| ETV6       | 106.1      | 0.74 | LY6E        | 108.8 | 0.58        | TRIM5    | 108.2          | 0.79 | IFI44          | 115.7 | 0.77         | CFB      | 113.9 | 0.68 | ISG20   | 110.9 | 0.61 | BATF2    | 121.7 | 0.90 |
| CASP7      | 106.2      | 0.75 | IL17RB      | 108.9 | 0.59        | STAP1    | 108.2          | 0.79 | BST2           | 115.7 | 0.77         | NT5C3    | 114.2 | 0.69 | ABTB2   | 111.1 | 0.62 | IL15RA   | 122.0 | 0.92 |
| MX1        | 106.2      | 0.75 | CD38        | 108.9 | 0.59        | CXCL9    | 108.3          | 0.80 | CPT1A          | 116.1 | 0.79         | TIMP1    | 114.2 | 0.69 | TMEM140 | 111.1 | 0.62 | EIF3EIP  | 122.6 | 0.94 |
| CRP        | 106.2      | 0.75 | SLC25A30    | 109.2 | 0.61        | LGMN     | 108.3          | 0.80 | SP110          | 116.1 | 0.79         | NOD2     | 114.5 | 0.71 | BLVRA   | 111.1 | 0.62 | CCR1     | 122.6 | 0.94 |
| GPX2       | 106.3      | 0.77 | LMO2        | 109.4 | 0.63        | CD9      | 108.4          | 0.81 | C4orf32        | 116.4 | 0.81         | HK2      | 114.5 | 0.71 | XAF1    | 111.5 | 0.65 | MS4A4A   | 122.6 | 0.94 |
| CCL8       | 106.3      | 0.77 | SCARB2      | 109.4 | 0.63        | C9orf19  | 108.4          | 0.81 | GPX2           | 116.4 | 0.81         | KIAA0040 | 114.5 | 0.71 | RSAD2   | 111.5 | 0.65 | IL17RB   | 123.0 | 0.96 |
| P2RY6      | 106.5      | 0.79 | ERLIN1      | 109.4 | 0.63        | PRAME    | 108.4          | 0.81 | PNPT1          | 116.4 | 0.81         | GTPBP2   | 114.5 | 0.71 | OAS2    | 112.1 | 0.68 | DCP1A    | 123.2 | 0.96 |
| FKBP5      | 106.5      | 0.79 | THOC4       | 109.6 | 0.64        | PSMB9    | 108.5          | 0.81 | TMEM140        | 116.4 | 0.81         | MT1M     | 114.5 | 0.71 | LEPR    | 112.1 | 0.68 | SERPING1 | 123.3 | 0.97 |
| C15orf48   | 106.8      | 0.83 | FBXO6       | 109.7 | 0.65        | CCL19    | 109.5          | 0.82 | IFI16          | 116.4 | 0.81         | AHNAK2   | 114.7 | 0.72 | PMM2    | 112.3 | 0.69 | CXCL11   | 123.3 | 0.97 |
| PSMB9      | 106.8      | 0.83 | CASP7       | 110.0 | 0.66        | SPSB1    | 108.6          | 0.83 | CXCL11         | 116.8 | 0.83         | GK       | 114.7 | 0.72 | CD38    | 112.3 | 0.69 | CD9      | 123.6 | 0.98 |
| SNN        | 106.9      | 0.85 | DHX58       | 110.2 | 0.68        | MAFF     | 108.7          | 0.83 | STAP4          | 116.8 | 0.83         | CASP7    | 115.0 | 0.73 | NOS2A   | 112.5 | 0.70 | APOL1    | 123.6 | 0.98 |
| ZNF313     | 106.9      | 0.85 | C9orf91     | 110.2 | 0.68        | LAP3     | 108.8          | 0.85 | PML            | 116.8 | 0.83         | ISG20    | 115.0 | 0.73 | SSBP3   | 112.7 | 0.71 | BUB1     | 123.6 | 0.98 |
| NOD2       | 107.0      | 0.85 | JUNB        | 110.3 | 0.68        | MYD88    | 108.8          | 0.85 | RNF19B         | 117.2 | 0.85         | OAS3     | 115.0 | 0.73 | TNFAIP6 | 112.7 | 0.71 | BTN3A3   | 123.9 | 0.99 |
| PADI2      | 107.1      | 0.87 | EXT1        | 110.4 | 0.69        | SERPIN1  | 109.0          | 0.87 | TFEC           | 117.9 | 0.88         | PPM1K    | 115.2 | 0.74 | OPTN    | 112.8 | 0.72 | CCDC75   | 123.9 | 0.99 |
| TRIM5      | 107.3      | 0.90 | CD274       | 110.4 | 0.69        | MAB21L2  | 109.0          | 0.87 | TMEM51         | 118.3 | 0.90         | CHMP5    | 115.2 | 0.74 | MX1     | 112.8 | 0.72 | SOCS1    | 124.3 | 1.01 |
| C4orf32    | 107.5      | 0.92 | SOCS2       |       |             |          |                |      |                |       |              |          |       |      |         |       |      |          |       |      |

| VV<br>Gene | PV    |      | CVB     |       | EAV  |          | SINV-G |      |          | SINV-A |        |          | ONNV  |        |         |       |      |         |       |      |
|------------|-------|------|---------|-------|------|----------|--------|------|----------|--------|--------|----------|-------|--------|---------|-------|------|---------|-------|------|
|            | Rep   | Z    | Gene    | Rep   | Z    | Gene     | Rep    | Z    | Gene     | Rep    | Z      | Gene     | Rep   | Z      |         |       |      |         |       |      |
| SMAD3      | 111.6 | 1.46 | MAFB    | 120.1 | 1.34 | EPST11   | 114.3  | 1.39 | SAA1     | 121.6  | 1.07   | FLT1     | 119.7 | 0.96   | SLC1A1  | 116.9 | 0.95 | SPTLC2  | 128.2 | 1.18 |
| TXNIP      | 111.8 | 1.49 | ARHGEF3 | 121.7 | 1.45 | C10orf10 | 114.9  | 1.45 | JAK2     | 122.0  | 1.09   | CREB3L3  | 120.2 | 0.99   | UPP2    | 117.3 | 0.97 | AMPH    | 128.7 | 1.19 |
| IFI6       | 113.8 | 1.75 | PIM3    | 122.8 | 1.52 | TNFSF10  | 120.1  | 1.97 | TBX3     | 122.3  | 1.10   | DDX3X    | 120.2 | 0.99   | HERC6   | 117.5 | 0.98 | FAM125B | 129.3 | 1.22 |
| TFEC       | 113.9 | 1.76 | SAMD4A  | 123.1 | 1.53 | TMEM51   | 120.4  | 2.00 | TDRD7    | 122.3  | 1.10   | TAP2     | 121.0 | 1.03   | ENPP1   | 118.5 | 1.04 | RNF24   | 129.3 | 1.22 |
| RIK2       | 115.2 | 1.93 | ISG20   | 124.9 | 1.66 | FNDC3B   | 122.0  | 2.16 | DDX3X    | 122.7  | 1.12   | PPM1K    | 121.5 | 1.05   | CD163   | 118.8 | 1.06 | PHF11   | 129.4 | 1.22 |
| DDX3X      | 115.6 | 1.98 | CSDA    | 128.6 | 1.90 | PIM3     | 125.5  | 2.50 | NPAS2    | 123.1  | 1.14   | LAP3     | 122.0 | 1.08   | B4GALT5 | 119.4 | 1.09 | C9orf19 | 129.5 | 1.23 |
| ISG20      | 118.4 | 2.35 | EPAS1   | 129.6 | 1.97 | MAP3K5   | 126.4  | 2.59 | IFITM2   | 123.8  | 1.18   | TBX3     | 122.6 | 1.10   | DNAPT6  | 119.6 | 1.10 | ZNF313  | 129.5 | 1.23 |
| ARHGEF3    | 118.6 | 2.37 | TMEM140 | 133.0 | 2.20 |          |        |      | IL6ST    | 123.8  | 1.18   | FNDC3B   | 122.6 | 1.10   | TAP2    | 119.8 | 1.11 | DTX3L   | 129.7 | 1.24 |
| TRIM25     | 125.1 | 3.23 | PARP12  | 134.1 | 2.27 |          |        |      | FAM125B  | 124.6  | 1.21   | RTP4     | 122.8 | 1.12   | AMPH    | 120.0 | 1.12 | EXT1    | 129.8 | 1.24 |
| PIM3       | 127.8 | 3.57 | MARCKS  | 138.2 | 2.54 |          |        |      | APOL1    | 124.6  | 1.21   | PNPT1    | 123.1 | 1.13   | CHMP5   | 120.0 | 1.12 | SIRPA   | 130.0 | 1.25 |
|            |       |      | MAP3K5  | 162.8 | 4.18 |          |        |      | MCL1     | 125.3  | 1.25   | UNC84B   | 123.4 | 1.14   | MARCKS  | 120.6 | 1.16 | DDX3X   | 130.0 | 1.25 |
|            |       |      |         |       |      |          |        |      | IRF9     | 125.3  | 1.25   | SLC1A1   | 124.4 | 1.19   | CTCF    | 120.8 | 1.17 | TMEM51  | 130.1 | 1.25 |
|            |       |      |         |       |      |          |        |      | AMPH     | 125.3  | 1.25   | SCO2     | 124.7 | 1.21   | EXT1    | 120.8 | 1.17 | CHMP5   | 130.1 | 1.25 |
|            |       |      |         |       |      |          |        |      | BUB1     | 125.3  | 1.25   | MASTL    | 124.9 | 1.22   | OAS1    | 121.9 | 1.23 | IFI44L  | 130.9 | 1.28 |
|            |       |      |         |       |      |          |        |      | MARCKS   | 126.4  | 1.31   | ENPP1    | 125.2 | 1.23   | ANKFY1  | 122.1 | 1.24 | CFB     | 131.1 | 1.30 |
|            |       |      |         |       |      |          |        |      | PLSCR1   | 126.8  | 1.32   | CCNA1    | 125.7 | 1.26   | CFB     | 122.5 | 1.27 | MAFB    | 131.1 | 1.30 |
|            |       |      |         |       |      |          |        |      | APOBEC3A | 126.8  | 1.32   | LIPA     | 126.0 | 1.27   | NCOA3   | 122.9 | 1.29 | FER1L3  | 132.0 | 1.33 |
|            |       |      |         |       |      |          |        |      | PABPC4   | 128.3  | 1.40   | IL1RN    | 126.2 | 1.28   | SPSB1   | 122.9 | 1.29 | SNN     | 132.2 | 1.34 |
|            |       |      |         |       |      |          |        |      | NAPA     | 129.0  | 1.43   | DDX60    | 127.5 | 1.35   | FAM125B | 123.1 | 1.30 | ANKFY1  | 133.5 | 1.39 |
|            |       |      |         |       |      |          |        |      | DTX3L    | 129.0  | 1.43   | STAT1    | 127.5 | 1.35   | PARP12  | 123.1 | 1.30 | SCARB2  | 134.5 | 1.44 |
|            |       |      |         |       |      |          |        |      | MX2      | 129.7  | 1.47   | RNF24    | 128.1 | 1.37   | TLK2    | 123.7 | 1.33 | LY6E    | 136.8 | 1.53 |
|            |       |      |         |       |      |          |        |      | CCL4     | 130.5  | 1.51   | TDRD7    | 128.6 | 1.40   | PIM3    | 123.9 | 1.34 |         |       |      |
|            |       |      |         |       |      |          |        |      | KIAA1618 | 130.5  | 1.51   | MKX      | 128.9 | 1.41   | IL6ST   | 124.7 | 1.39 |         |       |      |
|            |       |      |         |       |      |          |        |      | RNF24    | 132.0  | 1.58   | CNP      | 128.9 | 1.41   | APOL3   | 124.7 | 1.39 |         |       |      |
|            |       |      |         |       |      |          |        |      | CFB      | 132.3  | 1.60   | TLK2     | 130.4 | 1.49   | MAFB    | 125.4 | 1.43 |         |       |      |
|            |       |      |         |       |      |          |        |      | DDIT4    | 132.7  | 1.62   | BLZF1    | 131.2 | 1.53   | JAK2    | 125.8 | 1.45 |         |       |      |
|            |       |      |         |       |      |          |        |      | PARP12   | 132.7  | 1.62   | N4BP1    | 131.2 | 1.53   | ODC1    | 125.8 | 1.45 |         |       |      |
|            |       |      |         |       |      |          |        |      | RNASE4   | 133.1  | 1.64   | ZNF385B  | 132.0 | 1.56   | DTX3L   | 126.2 | 1.47 |         |       |      |
|            |       |      |         |       |      |          |        |      | CHMP5    | 133.8  | 1.67   | TXNIP    | 132.3 | 1.58   | TXNIP   | 126.8 | 1.51 |         |       |      |
|            |       |      |         |       |      |          |        |      | SNN      | 137.5  | 1.86   | PABPC4   | 134.1 | 1.67   | RNF24   | 127.0 | 1.52 |         |       |      |
|            |       |      |         |       |      |          |        |      | MAFB     | 138.2  | 1.89   | IRF9     | 134.4 | 1.68   | NPAS2   | 127.6 | 1.55 |         |       |      |
|            |       |      |         |       |      |          |        |      | GALNT2   | 145.3  | 2.24   | FLJ11286 | 134.4 | 1.68   | FNDC3B  | 128.1 | 1.58 |         |       |      |
|            |       |      |         |       |      |          |        |      | C9orf91  | 149.0  | 2.43   | JAK2     | 134.9 | 1.71   | FLT1    | 130.5 | 1.71 |         |       |      |
|            |       |      |         |       |      |          |        |      | EPAS1    | 149.0  | 2.43   | ZNF295   | 135.4 | 1.73   | HLA-E   | 131.6 | 1.78 |         |       |      |
|            |       |      |         |       |      |          |        |      | DUSP5    | 151.2  | 2.54   | TAGAP    | 136.2 | 1.77   | IRF9    | 132.6 | 1.83 |         |       |      |
|            |       |      |         |       |      |          |        |      | MCOLN2   | 173.4  | 3.64   | TLR7     | 137.0 | 1.81   | BLZF1   | 133.2 | 1.87 |         |       |      |
|            |       |      |         |       |      |          |        |      | ANKFY1   | 180.7  | 4.00   | APOL3    | 138.0 | 1.86   | INDO    | 136.5 | 2.05 |         |       |      |
|            |       |      |         |       |      |          |        |      |          |        | ANKFY1 | 140.6    | 1.99  | ZNF295 | 139.4   | 2.21  |      |         |       |      |
|            |       |      |         |       |      |          |        |      |          |        | UBA7   | 143.0    | 2.10  | DDX60  | 139.9   | 2.25  |      |         |       |      |
|            |       |      |         |       |      |          |        |      |          |        | NPAS2  | 146.4    | 2.27  | TLR7   | 140.7   | 2.29  |      |         |       |      |
|            |       |      |         |       |      |          |        |      |          |        | MAFB   | 153.2    | 2.60  | N4BP1  | 142.7   | 2.40  |      |         |       |      |
|            |       |      |         |       |      |          |        |      |          |        | INDO   | 161.9    | 3.03  | ADAR   | 148.8   | 2.75  |      |         |       |      |
|            |       |      |         |       |      |          |        |      |          |        | ADAR   | 168.7    | 3.36  |        |         |       |      |         |       |      |

Supplementary Table 2. ISG screening data sets for -ssRNA viruses

| Gene     | FLUAV |       | PIV3     |      | NDV   |          | HMPV |       | RSV      |      | MV    |          | BUNV |       |          |      |       |          |      |       |
|----------|-------|-------|----------|------|-------|----------|------|-------|----------|------|-------|----------|------|-------|----------|------|-------|----------|------|-------|
|          | Rep   | Z     | Gene     | Rep  | Z     | Gene     | Rep  | Z     | Gene     | Rep  | Z     | Gene     | Rep  | Z     |          |      |       |          |      |       |
| IFITM3   | 23.3  | -4.02 | MAP3K14  | 27.2 | -2.46 | ANKRD22  | 46.5 | -2.93 | HPSE     | 41.3 | -3.36 | HPSE     | 30.4 | -4.19 | IRF1     | 59.1 | -3.21 | IFITM3   | 68.2 | -3.75 |
| IRF1     | 32.4  | -3.55 | IRF2     | 30.1 | -2.36 | EXT1     | 50.2 | -2.72 | P2RY6    | 53.8 | -2.65 | THBD     | 59.9 | -2.41 | C5orf39  | 64.3 | -2.80 | IRF1     | 72.2 | -3.28 |
| IFITM2   | 37.7  | -3.27 | TMEM51   | 31.9 | -2.30 | IRF1     | 51.6 | -2.65 | PSMB9    | 58.0 | -2.41 | MAP3K14  | 60.1 | -2.40 | TRIM25   | 64.6 | -2.78 | IRF1     | 74.1 | -3.05 |
| MX1      | 44.7  | -2.91 | IRF1     | 38.2 | -2.08 | MX1      | 55.5 | -2.44 | CDKN1A   | 62.0 | -2.18 | cGAS     | 61.8 | -2.29 | SLC16A1  | 65.5 | -2.71 | HPSE     | 75.9 | -2.85 |
| TNFAIP3  | 49.2  | -2.68 | B4GALT5  | 40.8 | -2.00 | FFAR2    | 59.6 | -2.21 | PSMB8    | 64.6 | -2.03 | IRF2     | 64.4 | -2.14 | GBP3     | 65.7 | -2.69 | IFITM3   | 77.3 | -2.68 |
| FAM46A   | 49.4  | -2.67 | SNN      | 41.8 | -1.96 | GALNT2   | 60.6 | -2.16 | C9orf19  | 64.8 | -2.02 | IRF7     | 65.5 | -2.07 | OGFR     | 69.5 | -2.39 | UBE2L6   | 81.8 | -2.15 |
| MICB     | 60.4  | -2.09 | CD9      | 42.9 | -1.93 | MAP3K14  | 60.9 | -2.14 | CD9      | 65.0 | -2.01 | MICB     | 66.3 | -2.03 | IRF2     | 69.5 | -2.39 | LRG1     | 84.0 | -1.88 |
| PRKD2    | 62.6  | -1.98 | BCL3     | 44.7 | -1.86 | OASL     | 62.1 | -2.07 | GBP1     | 65.0 | -2.01 | ATF3     | 66.8 | -2.00 | THBD     | 69.8 | -2.37 | CSDA     | 84.2 | -1.86 |
| BCL3     | 64.4  | -1.89 | PTMA     | 47.8 | -1.76 | BST2     | 63.3 | -2.01 | IFITM3   | 65.6 | -1.97 | SAMD4A   | 67.1 | -1.98 | STAT2    | 70.5 | -2.32 | GBP4     | 84.7 | -1.81 |
| IL15RA   | 64.6  | -1.87 | OGFR     | 48.8 | -1.73 | MX1      | 63.7 | -1.99 | SAMHD1   | 65.8 | -1.96 | UNC93B1  | 69.0 | -1.86 | IL6ST    | 71.9 | -2.21 | MCL1     | 84.7 | -1.81 |
| SLC16A1  | 64.9  | -1.86 | IL15RA   | 50.2 | -1.68 | IFI27    | 66.5 | -1.83 | IFI6     | 68.4 | -1.82 | LGALS9   | 69.2 | -1.85 | CLEC4D   | 72.8 | -2.13 | C9orf19  | 84.8 | -1.79 |
| ABLIM3   | 65.6  | -1.82 | APOL1    | 51.8 | -1.63 | SPTLC2   | 66.9 | -1.81 | CCR1     | 69.8 | -1.73 | PFKFB3   | 70.0 | -1.81 | RBCK1    | 73.1 | -2.11 | C5orf39  | 85.0 | -1.77 |
| DNAPTP6  | 66.6  | -1.77 | CCR1     | 52.8 | -1.59 | GLRX     | 67.4 | -1.78 | IFI3     | 70.7 | -1.68 | NRN1     | 70.9 | -1.75 | NCOA3    | 73.5 | -2.08 | SNN      | 85.3 | -1.73 |
| LEPR     | 66.6  | -1.77 | MYD88    | 53.2 | -1.58 | IRF7     | 68.2 | -1.74 | PIM3     | 71.7 | -1.62 | TRIM25   | 72.2 | -1.67 | ABLIM3   | 73.8 | -2.06 | TMEM49   | 85.6 | -1.69 |
| CD163    | 66.9  | -1.76 | ABLIM3   | 53.4 | -1.57 | IFNGR1   | 68.2 | -1.74 | BST2     | 71.7 | -1.62 | IFI35    | 72.3 | -1.66 | ADAR     | 74.3 | -2.02 | SERPINB9 | 85.8 | -1.67 |
| NOD2     | 67.4  | -1.73 | IFI27    | 53.9 | -1.55 | CSDA     | 68.6 | -1.72 | IFI27    | 72.1 | -1.60 | P2RY6    | 72.5 | -1.65 | MARCKS   | 75.4 | -1.93 | IL28RA   | 85.8 | -1.67 |
| UNC93B1  | 67.4  | -1.73 | CX3CL1   | 54.0 | -1.55 | SERPING1 | 69.8 | -1.65 | BCL3     | 72.8 | -1.56 | THOC4    | 73.0 | -1.62 | OAS3     | 75.9 | -1.89 | ETV7     | 86.0 | -1.65 |
| OAS3     | 67.6  | -1.72 | SLC16A1  | 55.5 | -1.50 | KIAA1618 | 69.9 | -1.64 | MAFF     | 73.2 | -1.54 | PRAME    | 73.9 | -1.57 | IRF9     | 76.1 | -1.87 | IRF1     | 86.3 | -1.62 |
| TRIM25   | 68.6  | -1.67 | CSDA     | 55.6 | -1.50 | STAT1    | 69.9 | -1.64 | TRIM25   | 73.2 | -1.54 | OGFR     | 74.1 | -1.56 | AQP9     | 76.4 | -1.85 | IRF2     | 86.3 | -1.62 |
| GALNT2   | 69.4  | -1.63 | CD80     | 55.6 | -1.50 | FKBP5    | 70.3 | -1.62 | STAR5    | 74.0 | -1.49 | WARS     | 74.2 | -1.55 | IFI27    | 76.6 | -1.84 | NMI      | 86.3 | -1.62 |
| OGFR     | 70.1  | -1.59 | IFI35    | 55.7 | -1.50 | IFITM2   | 70.5 | -1.61 | INDO     | 74.5 | -1.47 | AIM2     | 74.4 | -1.54 | UNC93B1  | 77.3 | -1.78 | NRN1     | 86.4 | -1.60 |
| ODC1     | 70.1  | -1.59 | MSR1     | 55.7 | -1.50 | GBP5     | 71.5 | -1.56 | PRIC285  | 74.7 | -1.45 | CD38     | 74.7 | -1.52 | IL15RA   | 78.3 | -1.71 | CLEC4E   | 86.8 | -1.56 |
| TRIM34   | 70.6  | -1.56 | IRF7     | 55.9 | -1.49 | PSMB9    | 72.2 | -1.52 | SPTLC2   | 74.7 | -1.45 | ZNF385B  | 74.9 | -1.51 | PRKD2    | 78.5 | -1.69 | KIAA0040 | 87.1 | -1.52 |
| CX3CL1   | 70.9  | -1.55 | PML      | 56.2 | -1.48 | IL17RB   | 72.2 | -1.52 | CMAH     | 75.3 | -1.42 | PML      | 74.9 | -1.51 | SLC25A30 | 79.0 | -1.65 | PSCD1    | 87.6 | -1.47 |
| TBK3     | 70.9  | -1.55 | CLEC2B   | 57.0 | -1.45 | FCGR1A   | 72.7 | -1.49 | PHF11    | 75.3 | -1.42 | PSMB9    | 75.7 | -1.46 | FCGR1A   | 79.2 | -1.63 | MAP3K14  | 87.7 | -1.45 |
| PTMA     | 71.1  | -1.54 | TDRD7    | 57.1 | -1.45 | TLR3     | 73.0 | -1.47 | SLC15A3  | 75.5 | -1.41 | NCOA3    | 75.7 | -1.46 | LEPR     | 79.7 | -1.59 | MYD88    | 87.9 | -1.43 |
| AKT3     | 71.4  | -1.52 | GALNT2   | 57.8 | -1.42 | SNN      | 73.2 | -1.46 | CSDA     | 75.7 | -1.39 | SLC1A1   | 75.8 | -1.45 | HLA-F    | 80.2 | -1.56 | IL28RA   | 88.0 | -1.41 |
| FLT1     | 71.6  | -1.51 | MX2      | 58.6 | -1.40 | LMO2     | 73.5 | -1.45 | WARS     | 75.9 | -1.38 | TYMP     | 76.0 | -1.44 | LGMN     | 80.2 | -1.56 | KIAA0082 | 88.5 | -1.35 |
| ADAR     | 73.4  | -1.42 | PHF11    | 58.7 | -1.39 | CD38     | 73.7 | -1.44 | PRAME    | 76.4 | -1.36 | ADM      | 76.8 | -1.39 | FAM46A   | 80.2 | -1.56 | IL15     | 88.7 | -1.33 |
| CCNA1    | 73.4  | -1.42 | SLC1A1   | 58.7 | -1.39 | IFITM3   | 73.9 | -1.43 | IRF2     | 76.6 | -1.34 | SAMHD1   | 77.1 | -1.38 | C1S      | 80.9 | -1.50 | TMEM140  | 88.8 | -1.31 |
| AKT2     | 73.6  | -1.41 | NUP50    | 59.7 | -1.36 | GTPBP1   | 73.9 | -1.43 | IFITM1   | 77.0 | -1.32 | NFIL3    | 77.1 | -1.38 | PPM1K    | 80.9 | -1.50 | LGALS3   | 88.8 | -1.31 |
| STAT2    | 74.6  | -1.36 | WARS     | 60.1 | -1.35 | WARS     | 73.9 | -1.43 | ZNF313   | 77.2 | -1.31 | STAT2    | 78.2 | -1.31 | JAK2     | 80.9 | -1.50 | MTF2DL2  | 89.2 | -1.28 |
| SLC25A30 | 74.9  | -1.34 | TAGAP    | 60.4 | -1.34 | HSH2D    | 74.0 | -1.42 | STAT2    | 77.4 | -1.30 | BCL3     | 78.4 | -1.30 | PTMA     | 81.3 | -1.46 | TRAFD1   | 89.3 | -1.26 |
| HERC6    | 75.1  | -1.33 | LGALS9   | 60.5 | -1.34 | NUP50    | 74.4 | -1.40 | C4orf33  | 78.1 | -1.26 | TMEM51   | 79.0 | -1.26 | IL28RA   | 81.6 | -1.45 | ARG2     | 89.3 | -1.26 |
| CLEC2B   | 75.8  | -1.29 | MARCKS   | 60.9 | -1.32 | TXNIP    | 74.5 | -1.39 | ADAR     | 78.1 | -1.26 | IFI27    | 79.0 | -1.26 | CX3CL1   | 82.1 | -1.41 | CCL5     | 89.6 | -1.22 |
| IFIH1    | 75.8  | -1.29 | ULK4     | 61.0 | -1.32 | ALDH1A1  | 75.9 | -1.32 | MS4A4A   | 78.3 | -1.25 | PRIC285  | 79.3 | -1.24 | RARRES3  | 82.5 | -1.37 | VAMP5    | 90.0 | -1.18 |
| TAGAP    | 76.1  | -1.28 | ATF3     | 61.7 | -1.29 | ADFP     | 76.8 | -1.27 | CD69     | 78.5 | -1.24 | MSR1     | 79.7 | -1.22 | IFITM3   | 83.0 | -1.33 | MT1X     | 90.1 | -1.16 |
| IRF7     | 76.6  | -1.25 | CD274    | 62.1 | -1.28 | TMEM140  | 77.1 | -1.25 | GBP2     | 78.5 | -1.24 | SLC16A1  | 79.7 | -1.22 | cGAS     | 83.0 | -1.33 | MX1      | 90.3 | -1.14 |
| RBCK1    | 77.3  | -1.21 | IFITM3   | 62.1 | -1.28 | C9orf19  | 77.3 | -1.24 | GEM      | 78.9 | -1.21 | SCO2     | 80.0 | -1.20 | LY6E     | 83.2 | -1.32 | ARNLT    | 90.3 | -1.14 |
| TCF7L2   | 77.3  | -1.21 | RBCK1    | 62.2 | -1.28 | IFI35    | 77.4 | -1.23 | CD80     | 77.4 | -1.23 | PIM3     | 80.1 | -1.19 | CHMP5    | 83.5 | -1.30 | SAA1     | 90.4 | -1.13 |
| DDX60    | 77.3  | -1.21 | BUB1     | 62.3 | -1.27 | CPT1A    | 77.4 | -1.23 | SERPINB9 | 79.1 | -1.20 | JUNB     | 80.3 | -1.18 | IFITM3   | 83.7 | -1.28 | CCR1     | 90.6 | -1.11 |
| AQP9     | 77.6  | -1.20 | SCO2     | 63.0 | -1.25 | CCL5     | 77.6 | -1.22 | FAM46C   | 79.1 | -1.20 | GMFR     | 80.3 | -1.18 | ATP10D   | 83.7 | -1.28 | OPTN     | 90.6 | -1.11 |
| IFI27    | 77.6  | -1.20 | TRIM25   | 63.4 | -1.24 | IFI44L   | 77.9 | -1.20 | SOCS2    | 79.5 | -1.18 | AKT3     | 80.4 | -1.17 | CD163    | 83.7 | -1.28 | EHD4     | 90.6 | -1.11 |
| ADAMDEC1 | 78.6  | -1.15 | NCOA3    | 63.9 | -1.22 | ATF3     | 78.3 | -1.18 | SOCS1    | 79.5 | -1.18 | C15orf48 | 80.8 | -1.16 | WHDC1    | 83.9 | -1.26 | PNPT1    | 90.9 | -1.07 |
| ZNF295   | 78.6  | -1.15 | FCGR1A   | 64.6 | -1.20 | SLFN5    | 78.6 | -1.17 | CXCL10   | 79.7 | -1.16 | TXNIP    | 80.8 | -1.16 | FAM134B  | 84.2 | -1.24 | CD274    | 90.9 | -1.07 |
| GBP3     | 78.8  | -1.14 | MCL1     | 65.0 | -1.18 | MT1X     | 79.7 | -1.11 | SNN      | 79.7 | -1.16 | GALNT2   | 80.8 | -1.16 | IL15     | 84.4 | -1.22 | C2orf31  | 91.1 | -1.05 |
| CCND3    | 79.1  | -1.12 | SERPING1 | 65.7 | -1.16 | DHX58    | 79.7 | -1.11 | MICB     | 79.7 | -1.16 | PLEKH44  | 81.1 | -1.14 | HPSE     | 84.7 | -1.20 | BCL2L14  | 91.1 | -1.05 |
| FNDC3B   | 79.1  | -1.12 | SCARB2   | 65.8 | -1.16 | TRIM21   | 79.7 | -1.11 | APOL1    | 79.7 | -1.16 | AQP9     | 81.2 | -1.13 | OASL     | 85.1 | -1.17 | NCOA3    | 91.4 | -1.01 |
| IL6ST    | 79.8  | -1.08 | FAM46C   | 66.0 | -1.15 | FNDC4    | 79.7 | -1.11 | MT1X     | 80.2 | -1.14 | GBP1     | 81.2 | -1.13 | RASSF4   | 85.4 | -1.15 | LP3      | 91.6 | -0.99 |
| IL15     | 79.8  | -1.08 | IMP2     | 66.2 | -1.14 | RAB27A   | 79.8 | -1.10 | IRF7     | 80.4 | -1.13 | CLEC2B   | 81.4 | -1.12 | IL17RB   | 85.6 | -1.13 | FAM134B  | 91.7 | -0.97 |
| GCA      | 80.6  | -1.04 | ETV6     | 66.8 | -1.12 | STAT2    | 80.0 | -1.09 | IFITM3   | 80.4 | -1.13 | EHD4     | 81.6 | -1.11 | SLC15A3  | 86.1 | -1.09 | C4orf33  | 91.9 | -0.96 |
| cGAS     | 80.6  | -1.04 | IFI27    | 68.3 | -1.07 | IFIH1    | 80.2 | -1.08 | PDGFRL   | 80.6 | -1.12 | MYD88    | 81.6 | -1.11 | IRF7     | 86.5 | -1.06 | MX1      | 92.0 | -0.94 |
| IL1R     | 80.6  | -1.04 | LY6E     | 68.5 | -1.07 | PLEKH44  | 80.2 | -1.08 | FCGR1A   | 80.6 | -1.12 | B4GALT5  | 81.7 | -1.10 | PLSCR1   | 86.8 | -1.04 | EIF2A32  | 92.2 | -0.92 |
| THOC4    | 80.8  | -1.03 | ETV7     | 68.7 | -1.06 | C15orf48 | 80.3 | -1.07 | CDK8     | 80.6 | -1.12 | CLEC4D   | 82.0 | -1.08 | TBK3     | 87.0 | -1.02 | IFI27    | 92.2 | -0.92 |
| BLZF1    | 81.1  | -1.02 | ZNF313   | 68.7 | -1.06 | PSMB8    | 80.7 | -1.05 | CCL8     | 80.8 | -1.10 | IFIT5    | 82.2 | -1.07 | TAP1     | 87.3 | -1.00 | DHX58    | 92.4 | -0.90 |
| C9orf91  | 81.8  | -0.98 | VEGFC    | 68.8 | -1.05 | IFI16    | 81.0 | -1.04 | MSR1     | 81.1 | -1.09 | PSMB8    | 82.7 | -1.04 | TRIM14   | 87.5 | -0.98 | CD9      | 92.5 | -0.88 |
| NOS2A    | 82.6  | -0.94 | CD69     | 69.0 | -1.05 | MKX      | 81.4 | -1.02 | RPL22    | 81.2 | -1.08 | RASSF4   | 83.0 | -1.02 | STAR5    | 87.7 | -0.96 | ETV1     | 92.5 | -0.88 |
| IRF2     | 82.8  | -0.93 | HLA-F    | 69.5 | -1.03 | RGS1     | 81.5 | -1.01 | C15orf48 | 81.4 | -1.07 | VEGFC    | 83.6 | -0.98 | TRIM34   | 88.2 | -0.93 | GEM      | 92.7 | -0.86 |
| C5orf39  | 83.1  | -0.91 | KIAA0082 | 69.6 | -1.03 | BAG1     | 81.5 | -1.01 | MAP3K14  | 81.6 | -1.05 | CD9      | 83.8 | -0.97 | RIK2     | 88.4 | -0.91 | SOCS1    | 92.7 | -0.86 |
| RBM25    | 83.3  | -0.90 | IL1R     | 70.1 | -1.01 | FBXO6    | 81.7 | -1.00 | TRIM21   | 81.6 | -1.05 | EPST11   | 83.8 | -0.97 | SNN      | 88.7 | -0.89 | PM2IP1   | 92.7 | -0.86 |
| MARCKS   | 83.8  | -0.88 | IFI16    | 71.1 | -0.98 | FAM46C   | 82.0 | -0.98 | ARNLT    | 81.6 | -1.05 | GBP5     | 83.9 | -0.96 | ISG20    | 88.7 | -0.89 | PHF15    | 92.7 | -0.86 |
| PHF11    | 83.8  | -0.88 | IL17RB   | 71.6 | -0.96 | CXCL9    | 82.2 | -0.97 | BATF2    | 82.1 | -1.03 | PCTK2    | 83.9 | -0.96 | B4GALT5  | 88.7 | -0.89 | TLR3     | 92.8 | -0.84 |
| DDX58    | 84.1  | -0.86 | NRN1     | 72.1 | -0.94 | DEFB1    | 82.7 | -0.94 | ADFP     | 82.1 | -1.03 | SOCS1    | 84.1 | -0.95 | THOC4    | 88.9 | -0.87 | MAP3K5   | 93.2 | -0.80 |
| ATP10D   | 84.3  | -0.85 | STAR5    | 72.2 | -0.94 | LGALS9   | 82.7 | -0.94 | TAP1     | 82.1 | -1.03 | IRF1     | 84.4 | -0.94 | SMAD3    | 88.9 | -0.87 | SOCS2    | 93.3 | -0.79 |
| IFI30    | 84.3  | -0.85 | FAM70A   |      |       |          |      |       |          |      |       |          |      |       |          |      |       |          |      |       |

| FLUAV<br>Gene | PIV3 |       | NDV      |      | HMPV  |          | RSV  |       | MV       |      | BUNV  |          |      |       |          |      |       |           |      |       |
|---------------|------|-------|----------|------|-------|----------|------|-------|----------|------|-------|----------|------|-------|----------|------|-------|-----------|------|-------|
|               | Rep  | Z     | Rep      | Z    | Rep   | Z        | Rep  | Z     | Rep      | Z    | Rep   | Z        |      |       |          |      |       |           |      |       |
| CEBPD         | 86.3 | -0.75 | CD38     | 78.5 | -0.73 | IFITM3   | 87.6 | -0.67 | TNSF13B  | 85.0 | -0.86 | ULK4     | 86.8 | -0.79 | GJA4     | 90.8 | -0.72 | HLA-E     | 94.3 | -0.67 |
| TMEM140       | 86.3 | -0.75 | AKT3     | 78.5 | -0.73 | HEG1     | 87.6 | -0.67 | PCTK2    | 85.0 | -0.86 | MX2      | 87.4 | -0.75 | CCDC92   | 91.0 | -0.70 | RNASE4    | 94.3 | -0.67 |
| MAX           | 86.3 | -0.75 | PADI2    | 78.5 | -0.73 | LEPR     | 87.6 | -0.67 | CRY1     | 85.7 | -0.83 | RIK2     | 87.6 | -0.74 | EHD4     | 91.0 | -0.70 | RARRRES3  | 94.4 | -0.65 |
| BAG1          | 86.3 | -0.75 | SPSB1    | 78.6 | -0.72 | TRIM14   | 87.8 | -0.66 | OASL     | 85.9 | -0.81 | TRIM21   | 87.6 | -0.74 | SIRPA    | 91.5 | -0.67 | RTPA      | 94.9 | -0.60 |
| MCL1          | 86.6 | -0.73 | IFI44    | 78.6 | -0.72 | SAMHD1   | 88.0 | -0.65 | APOL6    | 85.9 | -0.81 | FAM46A   | 87.6 | -0.74 | NOD2     | 91.5 | -0.67 | HSH2D     | 94.9 | -0.60 |
| THBD          | 86.6 | -0.73 | WHDC1    | 78.6 | -0.72 | AIM2     | 88.0 | -0.65 | SAMD4A   | 86.3 | -0.79 | RBCK1    | 87.8 | -0.73 | CPT1A    | 91.5 | -0.67 | PLSCR1    | 95.2 | -0.56 |
| NPAS2         | 86.6 | -0.73 | MICB     | 78.6 | -0.72 | FER1L3   | 88.0 | -0.65 | SMAD3    | 86.3 | -0.79 | IL17RB   | 87.8 | -0.73 | RNF19B   | 91.5 | -0.67 | ULK4      | 95.2 | -0.56 |
| B4GALT5       | 86.6 | -0.73 | ANGPTL1  | 78.9 | -0.71 | PMAP1P   | 88.2 | -0.64 | BCL2L14  | 86.5 | -0.78 | SECTM1   | 87.9 | -0.72 | ODC1     | 91.5 | -0.67 | CXCL10    | 95.2 | -0.56 |
| DUSP5         | 86.8 | -0.72 | TNSF13B  | 79.4 | -0.70 | CCL2     | 88.2 | -0.64 | FFAR2    | 86.5 | -0.78 | ETV7     | 87.9 | -0.72 | RNASE4   | 92.5 | -0.59 | ISG15     | 95.4 | -0.54 |
| CLEC4D        | 87.3 | -0.69 | GBP4     | 79.4 | -0.70 | VAMP5    | 88.3 | -0.63 | OAS2     | 86.7 | -0.76 | MT1G     | 88.1 | -0.71 | HLA-C    | 92.7 | -0.57 | GCH1      | 95.4 | -0.54 |
| STAT1         | 87.8 | -0.67 | ISG20    | 79.4 | -0.70 | CD69     | 88.3 | -0.63 | IL15RA   | 86.9 | -0.75 | PPM1K    | 88.4 | -0.70 | CYP11B1  | 92.7 | -0.57 | GBP5      | 95.4 | -0.54 |
| ELF1          | 88.1 | -0.66 | PHF15    | 79.4 | -0.70 | IL15RA   | 88.5 | -0.62 | NCOA3    | 87.1 | -0.74 | APOL1    | 88.9 | -0.67 | FAM70A   | 92.9 | -0.55 | PPM1K     | 95.6 | -0.52 |
| ERLIN1        | 88.3 | -0.64 | FAM125B  | 80.0 | -0.68 | GBP1     | 88.7 | -0.62 | OAS2     | 87.3 | -0.73 | PXK      | 89.2 | -0.65 | ANGPTL1  | 92.9 | -0.55 | DDX58     | 95.6 | -0.52 |
| LIPA          | 88.3 | -0.64 | PUS1     | 80.3 | -0.67 | NDC80    | 88.7 | -0.62 | HLA-F    | 87.5 | -0.72 | C1S      | 89.4 | -0.64 | PSCD1    | 93.2 | -0.54 | FAM70A    | 95.6 | -0.52 |
| MT1F          | 88.8 | -0.62 | AHNAK2   | 80.5 | -0.66 | SP110    | 88.7 | -0.62 | IL28RA   | 87.8 | -0.70 | STARD5   | 89.4 | -0.64 |          | 93.4 | -0.52 | GBP3      | 95.6 | -0.52 |
| HLA-C         | 88.8 | -0.62 | NOD2     | 80.6 | -0.66 | ISG20    | 88.7 | -0.62 | IFI44    | 88.2 | -0.68 | FKBP5    | 89.4 | -0.64 | GBP5     | 93.4 | -0.52 | TNFRSF10A | 95.7 | -0.50 |
| RAB27A        | 89.6 | -0.58 | EHD4     | 80.7 | -0.65 | PHF11    | 88.8 | -0.61 | CXCL9    | 88.4 | -0.67 | TRIM5    | 89.4 | -0.64 | MCOLN2   | 93.6 | -0.50 | ENPP1     | 95.7 | -0.50 |
| IMP2A         | 90.1 | -0.55 | SLC25A28 | 80.8 | -0.65 | G6PC     | 88.8 | -0.61 | MARCKS   | 88.4 | -0.67 | LAMP3    | 89.4 | -0.64 | IFI6     | 93.9 | -0.48 | HESX1     | 95.9 | -0.48 |
| NCF1          | 90.1 | -0.55 | RIK2     | 81.1 | -0.64 | TREX1    | 88.8 | -0.61 | UBE2L6   | 88.4 | -0.67 | GTPBP1   | 89.8 | -0.61 | IFI30    | 94.1 | -0.46 | EPST11    | 95.9 | -0.48 |
| PABPC4        | 90.1 | -0.55 | MASTL    | 81.1 | -0.64 | WHDC1    | 88.8 | -0.61 | FUT4     | 88.6 | -0.66 | HLA-F    | 90.1 | -0.59 | SERPINB9 | 94.1 | -0.46 | COMMD3    | 95.9 | -0.48 |
| GLRX          | 90.6 | -0.53 | PLSCR1   | 81.2 | -0.64 | IFI6     | 89.0 | -0.60 | DCTP1A   | 88.6 | -0.66 | DNAPT6   | 90.1 | -0.59 | IL1R     | 94.1 | -0.46 | CXCL11    | 96.0 | -0.46 |
| C9orf19       | 90.6 | -0.53 | PRAME    | 81.8 | -0.62 | HESX1    | 89.0 | -0.60 | ATF3     | 88.8 | -0.64 | HES4     | 90.6 | -0.56 | CASP7    | 94.1 | -0.46 | ABCAN     | 96.0 | -0.46 |
| HES4          | 91.3 | -0.49 | CXCL11   | 82.4 | -0.60 | TRIM34   | 89.5 | -0.57 | OAS3     | 88.8 | -0.64 | SLC15A3  | 90.6 | -0.56 | CCL4     | 94.4 | -0.44 | ABTB2     | 96.0 | -0.46 |
| GBP5          | 91.6 | -0.47 | RNASE4   | 82.4 | -0.60 | TRIM25   | 89.7 | -0.56 | MX1      | 88.8 | -0.64 | PCTK3    | 90.6 | -0.56 | IFI27    | 94.4 | -0.44 | PRKD2     | 96.0 | -0.46 |
| ATF3          | 91.6 | -0.47 | HEG1     | 82.6 | -0.59 | CCL19    | 90.4 | -0.52 | ABLIM3   | 89.0 | -0.63 | ALDH1A1  | 90.8 | -0.55 | STAP1    | 94.6 | -0.42 | LGALS9    | 96.0 | -0.46 |
| KIAA0082      | 91.8 | -0.46 | GAK      | 82.7 | -0.58 | ZNF313   | 90.4 | -0.52 | IL17RB   | 89.2 | -0.62 | CD163    | 90.8 | -0.55 | NUP50    | 94.6 | -0.42 | CCDC92    | 96.2 | -0.45 |
| CASP7         | 91.8 | -0.46 | ISG15    | 82.9 | -0.58 | VEGFC    | 90.5 | -0.51 | C5orf39  | 89.2 | -0.62 | GBP2     | 90.9 | -0.54 | RBM25    | 94.6 | -0.42 | TREX1     | 96.2 | -0.45 |
| C5orf27       | 92.3 | -0.43 | C9orf19  | 83.1 | -0.57 | CD74     | 90.7 | -0.50 | NUP50    | 89.4 | -0.61 | KIAA0082 | 90.9 | -0.54 | OAS1     | 94.6 | -0.42 | AXUD1     | 96.4 | -0.43 |
| PRAME         | 92.6 | -0.42 | CES1     | 83.8 | -0.55 | UBE2L6   | 90.9 | -0.49 | IRF1     | 89.4 | -0.61 | IGFBP2   | 91.3 | -0.52 | AKT3     | 94.8 | -0.41 | CCL4      | 96.4 | -0.43 |
| CD274         | 92.6 | -0.42 | SMAD3    | 84.1 | -0.54 | DCP1A    | 91.1 | -0.49 | TRIM34   | 89.7 | -0.60 | SP110    | 91.4 | -0.51 | RAB27A   | 94.8 | -0.41 | SERPING1  | 96.4 | -0.43 |
| TRAFD1        | 92.6 | -0.42 | SAA1     | 84.4 | -0.53 | CD16A    | 91.2 | -0.48 | FAM46A   | 89.7 | -0.60 | PHF15    | 91.6 | -0.50 | LAMP3    | 94.8 | -0.41 | S100A8    | 96.5 | -0.41 |
| IFI6          | 92.8 | -0.41 | cGAS     | 84.5 | -0.52 | S100A8   | 91.6 | -0.46 | RAB27A   | 90.1 | -0.57 | PKD1     | 91.6 | -0.50 | LGALS9   | 95.1 | -0.39 | GLRX      | 96.7 | -0.39 |
| CD38          | 92.8 | -0.41 | AIM2     | 84.6 | -0.52 | ANGPTL1  | 91.7 | -0.45 | TMEM51   | 90.7 | -0.54 | PADI2    | 91.7 | -0.49 | ARNTL    | 95.1 | -0.39 | AMPH      | 96.7 | -0.39 |
| AXUD1         | 92.8 | -0.41 | OAS1     | 84.8 | -0.52 | AXUD1    | 92.1 | -0.43 | ETV7     | 90.7 | -0.54 | DCP1A    | 91.7 | -0.49 | PARP12   | 95.1 | -0.39 | SLC1A1    | 96.8 | -0.37 |
| TLR3          | 92.8 | -0.41 | TNFAIP3  | 84.9 | -0.51 | FAM134B  | 92.1 | -0.43 | RARRRES3 | 90.7 | -0.54 | FCGR1A   | 91.9 | -0.49 | MAP3K14  | 95.1 | -0.39 | CD69      | 97.0 | -0.35 |
| DHX58         | 93.1 | -0.40 | HESX1    | 85.2 | -0.50 | NCOA3    | 92.1 | -0.43 | PCTK3    | 90.7 | -0.54 | CSDA     | 91.9 | -0.49 | IFNGR1   | 95.3 | -0.37 | AHNAK2    | 97.0 | -0.35 |
| RASSF4        | 93.1 | -0.40 | ANKRD22  | 85.4 | -0.49 | RNF24    | 92.4 | -0.41 | G6PC     | 90.9 | -0.52 | WHDC1    | 92.1 | -0.48 | FAM46C   | 95.3 | -0.37 | PFKFB3    | 97.0 | -0.35 |
| IL1RN         | 93.3 | -0.38 | DNAPT6   | 85.9 | -0.48 | MICB     | 92.4 | -0.41 | CD74     | 91.1 | -0.51 | TRAFD1   | 92.1 | -0.48 | CCL5     | 95.5 | -0.35 | IFI6      | 97.0 | -0.35 |
| FFAR2         | 93.3 | -0.38 | MS444A   | 86.3 | -0.47 | GBP2     | 92.6 | -0.40 | BLVRA    | 91.1 | -0.51 | LMO2     | 92.2 | -0.47 | SSBP3    | 95.5 | -0.35 | TRIM14    | 97.0 | -0.35 |
| MASTL         | 93.3 | -0.38 | RNF24    | 86.4 | -0.46 | SAA1     | 92.8 | -0.39 | ULK4     | 91.1 | -0.51 | NDC80    | 92.5 | -0.45 | MX1      | 95.8 | -0.33 | PML       | 97.2 | -0.33 |
| BST2          | 93.3 | -0.38 | NDC80    | 86.9 | -0.45 | NMI      | 92.8 | -0.39 | TMEM140  | 91.1 | -0.51 | MT1X     | 92.7 | -0.44 | BAG1     | 96.0 | -0.31 | C10orf10  | 97.2 | -0.33 |
| GMPR          | 93.8 | -0.36 | HES4     | 87.2 | -0.43 | EHD4     | 92.8 | -0.39 | RASSF4   | 91.6 | -0.49 | HK2      | 92.7 | -0.44 | STAT1    | 96.0 | -0.31 | GK        | 97.2 | -0.33 |
| MAFB          | 93.8 | -0.36 | SLC25A30 | 87.3 | -0.43 | BCL3     | 92.8 | -0.39 | KIAA0040 | 91.6 | -0.49 | EXT1     | 93.3 | -0.40 | SPSB1    | 96.2 | -0.29 | PBEF1     | 97.2 | -0.33 |
| ZNF385B       | 94.3 | -0.33 | FUT4     | 88.3 | -0.40 | ARG2     | 92.9 | -0.38 | GTPBP1   | 91.8 | -0.47 | NMI      | 93.5 | -0.39 | BLVRA    | 96.2 | -0.29 | GJA4      | 97.5 | -0.29 |
| CPT1A         | 94.6 | -0.32 | TNFAIP6  | 89.1 | -0.37 | HK2      | 92.9 | -0.38 | EPST11   | 91.8 | -0.47 | CRY1     | 93.5 | -0.39 | CLEC2B   | 96.2 | -0.29 | CLEC4D    | 97.5 | -0.29 |
| PIM3          | 94.6 | -0.32 | STAT2    | 89.2 | -0.37 | STAP1    | 92.9 | -0.38 | KIAA1618 | 91.8 | -0.47 | NUP50    | 93.5 | -0.39 | PML      | 96.2 | -0.29 | SLC15A3   | 97.6 | -0.28 |
| XAF1          | 95.6 | -0.27 | TLR3     | 89.4 | -0.36 | XAF1     | 93.1 | -0.37 | EIF3EIP  | 92.0 | -0.46 | MX1      | 93.5 | -0.39 | HESX1    | 96.5 | -0.28 | C4orf32   | 97.6 | -0.28 |
| SPTLC2        | 96.1 | -0.24 | SOCS1    | 89.4 | -0.36 | PIM3     | 93.1 | -0.37 | LGALS9   | 92.0 | -0.46 | TDRD7    | 93.5 | -0.39 | ETV7     | 96.5 | -0.28 | STAP1     | 97.8 | -0.26 |
| PNRC1         | 96.3 | -0.23 | PXK      | 89.5 | -0.36 | CCL8     | 93.3 | -0.36 | PHF15    | 92.2 | -0.45 | SOCS2    | 93.6 | -0.38 | NRN1     | 96.7 | -0.26 | C22orf28  | 97.8 | -0.26 |
| FNDCA4        | 96.3 | -0.23 | DUSP5    | 89.5 | -0.36 | PCTK3    | 93.3 | -0.36 | HES4     | 92.4 | -0.44 | C9orf91  | 93.6 | -0.38 | DHX58    | 97.0 | -0.24 | ABLIM3    | 98.0 | -0.24 |
| ULK4          | 96.6 | -0.21 | KIAA1618 | 89.5 | -0.36 | FLJ39739 | 93.6 | -0.35 | GMPR     | 93.0 | -0.40 | PHF11    | 93.6 | -0.38 | UBA7     | 97.0 | -0.24 | CNNA1     | 98.0 | -0.24 |
| CCR1          | 96.6 | -0.21 | CMAH     | 89.5 | -0.36 | CHMP5    | 93.9 | -0.33 | IFI44L   | 93.0 | -0.40 | HLA-C    | 93.8 | -0.37 | VAMP5    | 97.2 | -0.22 | SIRPA     | 98.0 | -0.24 |
| MT1M          | 96.6 | -0.21 | IFI30    | 89.6 | -0.35 | MCL1     | 93.9 | -0.33 | B4GALT5  | 93.0 | -0.40 | CXCL10   | 93.8 | -0.37 | IMP2A    | 97.2 | -0.22 | OAS2      | 98.1 | -0.22 |
| FER1L3        | 96.6 | -0.21 | HERC6    | 89.9 | -0.34 | OPTN     | 94.1 | -0.32 | ANKRD22  | 93.2 | -0.39 | TIMP1    | 94.0 | -0.36 | CES1     | 97.2 | -0.22 | CLEC2B    | 98.1 | -0.22 |
| PSMB9         | 96.8 | -0.20 | BST2     | 90.4 | -0.33 | ABLIM3   | 94.1 | -0.32 | ISG20    | 93.2 | -0.39 | CCL5     | 94.0 | -0.36 | PUS1     | 97.2 | -0.22 | CX3CL1    | 98.1 | -0.22 |
| WHDC1         | 96.8 | -0.20 | APOL6    | 90.4 | -0.33 | C4orf33  | 94.3 | -0.31 | IMP2A    | 93.5 | -0.38 | ARHGEF3  | 94.1 | -0.35 | ISG15    | 97.4 | -0.20 | SAMHD1    | 98.3 | -0.20 |
| OPTN          | 96.8 | -0.20 | RGSI     | 90.7 | -0.32 | PI4K2B   | 94.3 | -0.31 | CREB3L3  | 93.5 | -0.38 | TREX1    | 94.3 | -0.34 | AIM2     | 97.4 | -0.20 | EPAS1     | 98.3 | -0.20 |
| CD69          | 96.8 | -0.20 | AMPH     | 90.8 | -0.31 | EIF3EIP  | 94.3 | -0.31 | KIAA0082 | 93.5 | -0.38 | LEPR     | 94.3 | -0.34 | PHF11    | 97.4 | -0.20 | CTCF      | 98.3 | -0.20 |
| PSMB8         | 97.1 | -0.19 | TRIM14   | 91.5 | -0.29 | CD80     | 94.5 | -0.30 | CLEC2B   | 93.7 | -0.37 | C4orf32  | 94.4 | -0.33 | BLZF1    | 97.4 | -0.20 | BTN3A3    | 98.3 | -0.20 |
| OAS2          | 97.1 | -0.19 | IFI44L   | 91.5 | -0.29 | PRAME    | 94.5 | -0.30 | TTEC     | 93.7 | -0.37 | CDKN1A   | 94.6 | -0.32 | ABTB2    | 97.7 | -0.18 | SLC25A28  | 98.4 | -0.18 |
| ISG20         | 97.3 | -0.18 | DHX58    | 91.5 | -0.29 | AKT3     | 94.5 | -0.30 | LRG1     | 93.9 | -0.35 | UBE2L6   | 94.8 | -0.31 | PRAME    | 97.9 | -0.16 | HLA-C     | 98.4 | -0.18 |
| ANKRD22       | 97.3 | -0.18 | PSMB9    | 91.5 | -0.29 | C2orf31  | 94.6 | -0.29 | SERPING1 | 93.9 | -0.35 | UNC84B   | 94.9 | -0.30 | GEM      | 97.9 | -0.16 | PADI2     | 98.6 | -0.16 |
| SIRPA         | 97.6 | -0.16 | GTPBP1   | 91.7 | -0.28 | RTP4     | 95.0 | -0.27 | CCDC109B | 93.9 | -0.35 | TRIM34   | 94.9 | -0.30 | TAP2     | 97.9 | -0.16 | PHF11     | 98.8 | -0.14 |
| CSDA          | 97.6 | -0.16 | BLVRA    | 91.9 | -0.28 | PADI2    | 95.0 | -0.27 | NRN1     | 94.3 | -0.33 | CD69     | 95.1 | -0.29 | ERLIN1   | 98.1 | -0.15 | SP110     | 98.8 | -0.14 |
| NTSC3         | 97.6 | -0.16 | BAG1     | 91.9 | -0.27 | DYNLT1   | 95.3 | -0.25 | MAX      | 94.3 | -0.33 | MCL1     |      |       |          |      |       |           |      |       |

| FLUAV<br>Gene | PIV3<br>Rep Z |      | NDV<br>Rep Z |       | HMPV<br>Rep Z |          | RSV<br>Rep Z |       | MV<br>Rep Z |       | BUNV<br>Rep Z |          |       |       |          |       |      |          |       |      |
|---------------|---------------|------|--------------|-------|---------------|----------|--------------|-------|-------------|-------|---------------|----------|-------|-------|----------|-------|------|----------|-------|------|
|               | Rep           | Z    | Rep          | Z     | Rep           | Z        | Rep          | Z     | Rep         | Z     | Rep           | Z        |       |       |          |       |      |          |       |      |
| GJA4          | 100.8         | 0.01 | TRIM38       | 94.5  | -0.19         | SOCS1    | 98.4         | -0.08 | SLC16A1     | 97.7  | -0.14         | HESX1    | 98.1  | -0.11 | CSDA     | 100.0 | 0.00 | UPP2     | 100.2 | 0.03 |
| SNN           | 101.0         | 0.02 | C4orf33      | 94.6  | -0.19         | MAFF     | 98.5         | -0.07 | GLRX        | 97.7  | -0.14         | ANKRD22  | 98.3  | -0.10 | CD74     | 100.5 | 0.04 | THOC4    | 100.4 | 0.05 |
| NMI           | 101.0         | 0.02 | CCDC75       | 95.1  | -0.17         | MYD88    | 98.5         | -0.07 | GBP5        | 97.9  | -0.12         | IL1RN    | 98.4  | -0.09 | CREB3L3  | 100.7 | 0.06 | TNFAIP3  | 100.4 | 0.05 |
| KIAA1618      | 101.0         | 0.02 | RPL22        | 95.1  | -0.17         | PRKD2    | 98.5         | -0.07 | PARP12      | 98.5  | -0.07         | ZBP1     | 98.4  | -0.09 | CD9      | 100.7 | 0.06 | SLC16A1  | 100.4 | 0.05 |
| TXNIP         | 101.0         | 0.02 | FAM46A       | 95.2  | -0.17         | MASTL    | 98.7         | -0.07 | MCOLN2      | 97.9  | -0.12         | CCDC75   | 98.4  | -0.09 | MASTL    | 100.7 | 0.06 | DDIT4    | 100.5 | 0.06 |
| EPST11        | 101.5         | 0.05 | OASL         | 95.3  | -0.16         | CCL4     | 98.9         | -0.06 | PPM1K       | 98.3  | -0.10         | GBP3     | 98.6  | -0.08 | SPTLC2   | 100.7 | 0.06 | IFI30    | 100.5 | 0.06 |
| C10orf10      | 101.5         | 0.05 | NCF1         | 95.6  | -0.15         | MAP3K5   | 98.9         | -0.06 | TNFSF10     | 98.3  | -0.10         | AGPAT9   | 98.7  | -0.07 | TMEM140  | 100.7 | 0.06 | TNFAIP6  | 100.5 | 0.06 |
| JUNB          | 101.5         | 0.05 | SLC15A3      | 95.7  | -0.15         | AQP9     | 98.9         | -0.06 | IFIH1       | 98.3  | -0.10         | FNDC4    | 98.9  | -0.06 | BUB1     | 100.7 | 0.06 | CRP      | 100.5 | 0.06 |
| STAR5         | 101.8         | 0.06 | IFIH1        | 95.9  | -0.14         | STAR5    | 99.1         | -0.05 | IFI30       | 98.5  | -0.09         | SNN      | 98.9  | -0.06 | SLFN5    | 101.0 | 0.08 | NAPA     | 100.5 | 0.06 |
| SAMHD1        | 101.8         | 0.06 | CCL8         | 96.3  | -0.13         | KIAA0082 | 99.1         | -0.05 | PMAIP1      | 98.5  | -0.09         | LY6E     | 98.9  | -0.06 | G6PC     | 101.0 | 0.08 | MARCKS   | 100.5 | 0.06 |
| IFI44L        | 101.8         | 0.06 | PFKFB3       | 96.4  | -0.13         | GZMB     | 99.4         | -0.03 | GPX2        | 98.5  | -0.09         | EIF3EIP  | 99.1  | -0.05 | DDX3X    | 101.0 | 0.08 | MAX      | 100.7 | 0.08 |
| DDX3X         | 102.0         | 0.07 | THBD         | 96.5  | -0.12         | AMPH     | 99.4         | -0.03 | RBM25       | 98.5  | -0.09         | IFIT3    | 99.1  | -0.05 | BCL3     | 101.0 | 0.08 | DNAPT6   | 100.7 | 0.08 |
| IFITM1        | 102.0         | 0.07 | ADAMDEC1     | 97.2  | -0.10         | DDX58    | 99.4         | -0.03 | ZNF295      | 98.5  | -0.09         | IFITM2   | 99.4  | -0.04 | IFIT1    | 101.2 | 0.10 | ZBP1     | 100.8 | 0.10 |
| GBP4          | 102.3         | 0.08 | RARRES3      | 97.7  | -0.08         | IFIT5    | 99.6         | -0.02 | NFIL3       | 98.7  | -0.08         | CX3CL1   | 99.4  | -0.04 | HK2      | 101.2 | 0.10 | GBP2     | 100.8 | 0.10 |
| ARHGFE3       | 102.3         | 0.08 | PMAIP1       | 97.9  | -0.07         | PABPC4   | 99.9         | 0.00  | DNAPT6      | 98.7  | -0.08         | CD274    | 99.4  | -0.04 | ZNF295   | 101.2 | 0.10 | C9orf91  | 100.8 | 0.10 |
| HLA-F         | 102.5         | 0.10 | SP110        | 98.0  | -0.07         | SIRPA    | 100.4        | 0.03  | RIK2        | 98.7  | -0.08         | ADAR     | 99.7  | -0.02 | HSHT2D   | 101.4 | 0.11 | OAS3     | 101.0 | 0.12 |
| STEAP4        | 102.5         | 0.10 | SERPINE1     | 98.1  | -0.07         | DDX3X    | 98.1         | -0.07 | DEFB1       | 98.9  | -0.06         | STAT1    | 99.8  | -0.01 | EPAS1    | 101.7 | 0.13 | LINCRC   | 101.0 | 0.12 |
| ANGPTL1       | 102.5         | 0.10 | C9orf91      | 98.1  | -0.07         | CXCL11   | 100.6        | 0.04  | EHD4        | 98.9  | -0.06         | CCR1     | 100.0 | 0.00  | IRF1     | 101.7 | 0.13 | LMO2     | 101.0 | 0.12 |
| PSCD1         | 102.5         | 0.10 | PKD1         | 98.5  | -0.05         | SCO2     | 100.6        | 0.04  | TNFAIP3     | 98.9  | -0.06         | IFI16    | 100.2 | 0.01  | BST2     | 101.7 | 0.13 | ANGPTL1  | 101.0 | 0.12 |
| APOBEC3A      | 102.5         | 0.10 | BCL2L14      | 98.5  | -0.05         | ETV7     | 100.8        | 0.05  | GALNT2      | 98.9  | -0.06         | IFI44L   | 100.3 | 0.02  | EIF3EIP  | 101.9 | 0.15 | ANKFY1   | 101.2 | 0.14 |
| RNF19B        | 102.8         | 0.11 | RTP4         | 98.7  | -0.05         | CDKN1A   | 101.4        | 0.08  | CCL5        | 99.4  | -0.04         | MT1H     | 100.5 | 0.03  | AGPAT9   | 101.9 | 0.15 | IL15RA   | 101.3 | 0.16 |
| ZNF313        | 102.8         | 0.11 | FER1L3       | 99.0  | -0.04         | IGFBP2   | 101.6        | 0.09  | PLEKHA4     | 99.6  | -0.03         | IFIT1    | 100.6 | 0.04  | HERC6    | 101.9 | 0.15 | IL1RN    | 101.3 | 0.16 |
| RARRES3       | 103.0         | 0.12 | ADFP         | 99.1  | -0.03         | UNC93B1  | 101.6        | 0.09  | TBX3        | 99.6  | -0.03         | GBP4     | 100.8 | 0.05  | TRIM38   | 102.2 | 0.17 | AQP9     | 101.3 | 0.16 |
| EHD4          | 103.3         | 0.14 | GBP5         | 99.2  | -0.03         | B4GALT5  | 101.6        | 0.09  | COMMD3      | 99.6  | -0.03         | MS4A4A   | 101.0 | 0.06  | IFITM1   | 102.2 | 0.17 | FBXO6    | 101.3 | 0.16 |
| IFI44         | 103.3         | 0.14 | GEM          | 99.4  | -0.02         | GEM      | 101.8        | 0.10  | SPSB1       | 100.0 | 0.00          | MT1M     | 101.1 | 0.07  | UNC84B   | 102.4 | 0.19 | PTMA     | 101.3 | 0.16 |
| IRF9          | 103.3         | 0.14 | MAP3K5       | 99.4  | -0.02         | GBP4     | 101.8        | 0.10  | FAM70A      | 100.0 | 0.00          | MT1F     | 101.1 | 0.07  | SOC52    | 102.6 | 0.21 | ISG20    | 101.3 | 0.16 |
| C22orf28      | 103.3         | 0.14 | C15orf48     | 99.5  | -0.02         | IRF2     | 101.9        | 0.11  | ABTB2       | 100.0 | 0.00          | C2orf31  | 101.1 | 0.07  | BATF2    | 102.6 | 0.21 | ANKRD22  | 101.5 | 0.18 |
| TREX1         | 103.8         | 0.16 | TXNIP        | 99.7  | -0.01         | PHF15    | 102.3        | 0.13  | NMI         | 100.0 | 0.00          | LGMN     | 101.3 | 0.08  | SERPINE1 | 102.6 | 0.21 | GAK      | 101.5 | 0.18 |
| CCDC75        | 103.8         | 0.16 | CCDC92       | 99.7  | -0.01         | IL1R     | 102.3        | 0.13  | FLT1        | 100.2 | 0.01          | CCND3    | 101.3 | 0.08  | INDO     | 102.6 | 0.21 | IFNGR1   | 101.5 | 0.18 |
| CCL5          | 104.0         | 0.17 | INDO         | 99.9  | -0.01         | ETV6     | 102.5        | 0.14  | ENPP1       | 100.4 | 0.02          | IFITM3   | 101.3 | 0.08  | IGFBP2   | 102.6 | 0.21 | PUS1     | 101.5 | 0.18 |
| BLVRA         | 104.3         | 0.19 | CLEC4E       | 99.9  | -0.01         | PBEF1    | 102.5        | 0.14  | PFKFB3      | 100.4 | 0.02          | GPX2     | 101.4 | 0.09  | TREX1    | 102.9 | 0.22 | ATP10D   | 101.5 | 0.18 |
| CRY1          | 104.3         | 0.19 | CCNA1        | 100.0 | 0.00          | SERPINB9 | 102.5        | 0.14  | LGMN        | 100.6 | 0.03          | HLA-G    | 101.4 | 0.09  | NT5C3    | 102.9 | 0.22 | PLEKHA4  | 101.8 | 0.22 |
| HEG1          | 104.3         | 0.19 | IGFBP2       | 100.1 | 0.00          | SAT1     | 102.6        | 0.15  | HEG1        | 100.6 | 0.03          | MASTL    | 101.4 | 0.09  | MYD88    | 102.9 | 0.22 | RBCK1    | 101.8 | 0.22 |
| FAM125B       | 104.3         | 0.19 | PSCD1        | 100.6 | 0.02          | BCL2L14  | 102.8        | 0.16  | SLFN5       | 100.6 | 0.03          | RAB27A   | 101.6 | 0.10  | CD69     | 102.9 | 0.22 | APOL1    | 101.8 | 0.22 |
| IFI35         | 104.5         | 0.20 | S100A8       | 100.6 | 0.02          | TRAFD1   | 102.8        | 0.16  | NOS2A       | 100.8 | 0.04          | CLEC4E   | 101.8 | 0.11  | TIMP1    | 103.1 | 0.24 | DCP1A    | 102.1 | 0.25 |
| TIMP1         | 104.8         | 0.21 | AXUD1        | 100.6 | 0.02          | FNDC3B   | 102.8        | 0.16  | AHNAK2      | 101.3 | 0.07          | BST2     | 101.8 | 0.11  | CCND3    | 103.1 | 0.24 | RASSF4   | 102.3 | 0.27 |
| MSR1          | 105.0         | 0.23 | CRP          | 100.6 | 0.02          | TLK2     | 103.1        | 0.18  | APOL2       | 101.3 | 0.07          | OPTN     | 102.1 | 0.13  | PLEKHA4  | 103.1 | 0.24 | MT1G     | 102.3 | 0.27 |
| BTN3A3        | 105.3         | 0.24 | RASSF4       | 100.7 | 0.02          | CYP1B1   | 103.3        | 0.19  | FBXO6       | 101.5 | 0.08          | PARP12   | 102.2 | 0.14  | CTCF     | 103.1 | 0.24 | IFIT5    | 102.3 | 0.27 |
| TAP2          | 105.3         | 0.24 | IFIT3        | 100.7 | 0.02          | ERLIN1   | 103.5        | 0.20  | MX1         | 101.7 | 0.09          | STAP1    | 101.4 | 0.05  | TRIM21   | 103.1 | 0.24 | C1S      | 102.4 | 0.29 |
| MAFF          | 105.3         | 0.24 | CD74         | 100.8 | 0.02          | FAM46A   | 103.6        | 0.21  | TAP2        | 101.7 | 0.09          | C10orf10 | 102.5 | 0.16  | MTHFD2L  | 103.1 | 0.24 | DDX60    | 102.4 | 0.29 |
| SERPING1      | 105.5         | 0.25 | RBM25        | 101.0 | 0.03          | PARP12   | 104.0        | 0.22  | LGALS3      | 101.9 | 0.11          | CXCL9    | 103.0 | 0.19  | SLC11A1  | 103.1 | 0.24 | ADAMDEC1 | 102.6 | 0.31 |
| CNP           | 105.8         | 0.27 | BATF2        | 101.8 | 0.06          | PFKFB3   | 101.6        | 0.06  | IFI6        | 102.1 | 0.12          | SAA1     | 103.0 | 0.19  | PFKFB3   | 103.3 | 0.26 | MAF8     | 102.6 | 0.31 |
| TAP1          | 106.0         | 0.28 | FNDC3B       | 102.4 | 0.08          | TRIM5    | 104.2        | 0.23  | PPM1K       | 102.3 | 0.13          | LINCRC   | 103.2 | 0.19  | PPM1K    | 103.3 | 0.26 | PI4K2B   | 102.6 | 0.31 |
| PNPT1         | 106.0         | 0.28 | PDGFRL       | 102.9 | 0.09          | THBD     | 104.5        | 0.25  | TLR3        | 102.3 | 0.13          | C4orf33  | 103.3 | 0.20  | EPST11   | 103.3 | 0.26 | CEBPD    | 102.9 | 0.33 |
| MYD88         | 106.0         | 0.28 | TCF7L2       | 103.3 | 0.11          | USP18    | 104.5        | 0.25  | CLEC4E      | 102.5 | 0.14          | PDGFRL   | 103.3 | 0.20  | TLR7     | 103.3 | 0.26 | PPM1K    | 102.8 | 0.33 |
| PLEKHA4       | 106.3         | 0.29 | EXT1         | 104.0 | 0.13          | SECTM1   | 104.7        | 0.26  | AGPAT9      | 102.5 | 0.14          | TLR3     | 103.3 | 0.20  | MAX      | 103.6 | 0.28 | CXCL9    | 102.9 | 0.35 |
| IL17RB        | 106.3         | 0.29 | CXCL10       | 104.3 | 0.14          | EPST11   | 104.8        | 0.27  | DTX3L       | 102.7 | 0.15          | SCARB2   | 103.5 | 0.21  | EIF2AK2  | 103.6 | 0.28 | TDRD7    | 103.1 | 0.37 |
| LGAL59        | 106.5         | 0.30 | GCH1         | 104.6 | 0.15          | TNFSF10  | 105.0        | 0.17  | ADAMDEC1    | 103.0 | 0.17          | DYNLT1   | 103.7 | 0.22  | MAB21L2  | 103.8 | 0.30 | MICB     | 103.1 | 0.37 |
| LGMN          | 106.5         | 0.30 | ABTB2        | 105.3 | 0.18          | CLEC4E   | 105.0        | 0.28  | IL1RN       | 103.2 | 0.18          | PRKD2    | 103.7 | 0.22  | MT1M     | 104.0 | 0.32 | HEG1     | 103.1 | 0.37 |
| DDIT4         | 106.8         | 0.32 | CPT1A        | 105.4 | 0.18          | TBX3     | 105.0        | 0.28  | TDRD7       | 103.2 | 0.18          | IFITM3   | 103.8 | 0.23  | FLJ39739 | 104.0 | 0.32 | JUNB     | 103.1 | 0.37 |
| ENPP1         | 106.8         | 0.32 | EIF3EIP      | 105.8 | 0.19          | PUS1     | 105.2        | 0.29  | AKT3        | 103.4 | 0.19          | GEM      | 103.8 | 0.23  | CXCL10   | 104.0 | 0.32 | CCND3    | 103.2 | 0.39 |
| PPM1K         | 106.8         | 0.32 | SLFN5        | 106.0 | 0.20          | ISG15    | 105.2        | 0.29  | STAT1       | 103.4 | 0.19          | ISG20    | 103.8 | 0.23  | TFEC     | 104.0 | 0.32 | MXK      | 103.2 | 0.39 |
| EIF3EIP       | 107.0         | 0.33 | IFIT5        | 106.1 | 0.20          | PLSCR1   | 105.3        | 0.30  | OGFR        | 103.8 | 0.21          | C9orf19  | 104.0 | 0.24  | GTPBP2   | 104.3 | 0.34 | CD38     | 102.3 | 0.39 |
| RGS1          | 107.3         | 0.34 | IFNGR1       | 106.2 | 0.20          | B2M      | 105.3        | 0.30  | MTHFD2L     | 104.0 | 0.23          | FAM134B  | 104.3 | 0.26  | GCH1     | 104.3 | 0.34 | GCA      | 103.4 | 0.41 |
| SCARB2        | 107.3         | 0.34 | TBX3         | 106.2 | 0.21          | PKD1     | 105.5        | 0.31  | IFIT1       | 104.0 | 0.23          | HERC6    | 104.3 | 0.26  | GMPT     | 104.3 | 0.34 | MT1H     | 103.4 | 0.41 |
| PBEF1         | 107.5         | 0.36 | ATP10D       | 106.8 | 0.22          | MX2      | 105.9        | 0.33  | CRP         | 104.4 | 0.25          | BUB1     | 104.5 | 0.27  | PCTK2    | 104.3 | 0.34 | MT1F     | 103.6 | 0.42 |
| FAM134B       | 107.5         | 0.36 | ADM          | 107.3 | 0.24          | NT5C3    | 106.0        | 0.34  | TRIM38      | 104.4 | 0.25          | IRF9     | 104.6 | 0.28  | PDGFRL   | 104.3 | 0.34 | RNF19B   | 103.7 | 0.44 |
| IFI27         | 107.5         | 0.36 | TMEM140      | 107.9 | 0.26          | CES1     | 106.2        | 0.35  | GTPBP2      | 104.6 | 0.26          | PI4K2B   | 104.6 | 0.28  | CCNA1    | 104.5 | 0.35 | FLJ23556 | 103.7 | 0.44 |
| COMMD3        | 107.5         | 0.36 | ALDH1A1      | 108.1 | 0.27          | GPX2     | 106.7        | 0.37  | DYNLT1      | 104.6 | 0.26          | NT5C3    | 104.6 | 0.28  | DNAPT6   | 104.5 | 0.35 | PARP12   | 103.9 | 0.46 |
| HESX1         | 107.8         | 0.37 | DDX58        | 108.3 | 0.28          | UPP2     | 106.9        | 0.38  | IL1R        | 104.6 | 0.26          | COMMD3   | 104.6 | 0.28  | DDIT4    | 104.8 | 0.37 | HK2      | 103.9 | 0.46 |
| IFIT5         | 107.8         | 0.37 | FKBP5        | 108.4 | 0.28          | DUSP5    | 106.9        | 0.38  | PML         | 105.1 | 0.29          | TMEM49   | 104.8 | 0.29  | CNP      | 104.8 | 0.37 | C5orf27  | 104.0 | 0.48 |
| TRIM21        | 107.8         | 0.37 | DCP1A        | 108.4 | 0.28          | C1S      | 106.9        | 0.38  | C1S         | 105.3 | 0.30          | ISG15    | 104.9 | 0.30  | TRAFD1   | 105.0 | 0.39 | IL17RB   | 104.0 | 0.48 |
| SP110         | 108.0         | 0.38 | TRIM21       | 108.9 | 0.30          | CCDC92   | 107.4        | 0     |             |       |               |          |       |       |          |       |      |          |       |      |



| FLUAV<br>Gene | PIV3  |      | NDV      |       | HMPV |           | RSV   |      | MV        |       | BUNV |          |       |      |          |       |      |          |       |      |
|---------------|-------|------|----------|-------|------|-----------|-------|------|-----------|-------|------|----------|-------|------|----------|-------|------|----------|-------|------|
|               | Rep   | Z    | Rep      | Z     | Rep  | Z         | Rep   | Z    | Rep       | Z     | Rep  | Z        |       |      |          |       |      |          |       |      |
| CLEC4E        | 110.0 | 0.49 | TMEM49   | 114.1 | 0.47 | KIAA0040  | 110.1 | 0.56 | CASP7     | 108.9 | 0.50 | IFI30    | 107.5 | 0.45 | LGALS3   | 106.6 | 0.52 | UNC93B1  | 105.5 | 0.65 |
| PUS1          | 110.0 | 0.49 | PRIC285  | 114.5 | 0.48 | DNAPT6    | 110.1 | 0.56 | TNFRSF10A | 109.1 | 0.52 | IFNGR1   | 107.5 | 0.45 | ANKRD22  | 106.6 | 0.52 | APOL2    | 105.7 | 0.67 |
| UPP2          | 110.0 | 0.49 | GLRX     | 114.7 | 0.49 | ADAR      | 110.1 | 0.56 | CD163     | 109.1 | 0.52 | IL15     | 107.6 | 0.46 | PNPT1    | 106.6 | 0.52 | CD74     | 105.7 | 0.67 |
| CD9           | 110.0 | 0.50 | CCL19    | 114.7 | 0.49 | CNP       | 110.3 | 0.57 | SAA1      | 109.3 | 0.53 | CCDC109B | 107.6 | 0.46 | TNSF13B  | 107.1 | 0.56 | MT1M     | 105.7 | 0.67 |
| HLA-E         | 110.5 | 0.51 | GBP3     | 114.8 | 0.50 | AGPAT9    | 110.3 | 0.57 | FAM125B   | 109.3 | 0.53 | CXCL11   | 107.8 | 0.47 | C10orf10 | 107.1 | 0.56 | SCO2     | 105.7 | 0.67 |
| NFIL3         | 110.5 | 0.51 | G6PC     | 114.9 | 0.50 | MT1H      | 110.3 | 0.57 | FLJ23556  | 109.5 | 0.54 | IL1R     | 108.0 | 0.48 | PDK1     | 107.1 | 0.56 | CASP7    | 105.7 | 0.67 |
| NDC80         | 111.0 | 0.54 | TRIM34   | 115.6 | 0.52 | PTMA      | 110.5 | 0.58 | SLC25A30  | 109.7 | 0.55 | CEBPD    | 108.1 | 0.49 | FUT4     | 107.4 | 0.58 | ALDH1A1  | 105.8 | 0.69 |
| TMEM49        | 111.3 | 0.55 | MAFF     | 116.3 | 0.55 | RASSF4    | 110.8 | 0.60 | IGFBP2    | 109.9 | 0.56 | IFI44    | 108.3 | 0.50 | C9orf19  | 107.4 | 0.58 | HERC6    | 106.0 | 0.71 |
| TNFAIP6       | 111.3 | 0.55 | JAK2     | 117.3 | 0.58 | ARHGEF3   | 111.0 | 0.61 | PBEF1     | 110.3 | 0.59 | DUSP5    | 108.3 | 0.50 | MT1F     | 107.6 | 0.60 | TNFSF10  | 106.0 | 0.71 |
| MT1X          | 111.3 | 0.55 | IL15     | 117.7 | 0.59 | AHNAK2    | 111.3 | 0.63 | ADM       | 111.6 | 0.66 | FLJ23556 | 108.4 | 0.51 | IFITM2   | 107.6 | 0.60 | FNDC4    | 106.0 | 0.71 |
| EXT1          | 111.5 | 0.56 | SECTM1   | 118.0 | 0.60 | SLC25A30  | 111.5 | 0.63 | XAF1      | 111.6 | 0.66 | PMAIP1   | 108.4 | 0.51 | FER1L3   | 107.6 | 0.60 | ETV6     | 106.3 | 0.75 |
| SAMD4A        | 111.8 | 0.58 | LRG1     | 118.0 | 0.60 | LIPA      | 111.6 | 0.64 | SERPINE1  | 111.8 | 0.67 | BAG1     | 108.6 | 0.52 | TXNIP    | 107.8 | 0.61 | RGS1     | 106.3 | 0.75 |
| FKBP5         | 111.8 | 0.58 | AGPAT9   | 118.4 | 0.62 | ENPP1     | 111.8 | 0.65 | SECTM1    | 112.0 | 0.69 | IL15RA   | 108.7 | 0.53 | STEAP4   | 107.8 | 0.61 | BLVRA    | 106.3 | 0.75 |
| AMPH          | 112.3 | 0.60 | LAMP3    | 118.5 | 0.62 | TMEM49    | 111.8 | 0.65 | IFNGR1    | 112.0 | 0.69 | RNF24    | 108.9 | 0.54 | SP110    | 107.8 | 0.61 | TXNIP    | 106.6 | 0.76 |
| BCL2L14       | 112.3 | 0.60 | PNPT1    | 118.6 | 0.62 | COMMD3    | 112.3 | 0.68 | RGS1      | 112.2 | 0.70 | BLVRA    | 109.2 | 0.56 | BTN3A3   | 108.1 | 0.63 | UNC84B   | 106.6 | 0.78 |
| PMM2          | 112.5 | 0.62 | IL6ST    | 119.0 | 0.64 | P2RY6     | 112.3 | 0.68 | MXK       | 112.2 | 0.70 | USP18    | 109.4 | 0.57 | C15orf48 | 108.3 | 0.65 | CCL8     | 106.6 | 0.78 |
| GEM           | 112.5 | 0.62 | ENPP1    | 119.3 | 0.65 | RIK2      | 112.3 | 0.68 | PABPC4    | 112.2 | 0.70 | TNSF13B  | 109.5 | 0.58 | PXK      | 108.5 | 0.67 | NUP50    | 105.6 | 0.78 |
| IFI16         | 112.5 | 0.62 | CYP1B1   | 119.8 | 0.66 | cGAS      | 112.3 | 0.68 | STEAP4    | 112.4 | 0.71 | MCOLN2   | 110.0 | 0.61 | PMM2     | 108.5 | 0.67 | PSMB8    | 106.6 | 0.78 |
| B2M           | 112.8 | 0.63 | CRY1     | 120.5 | 0.69 | RBCK1     | 112.3 | 0.68 | MCL1      | 112.7 | 0.72 | LGALS3   | 110.5 | 0.64 | IFI35    | 108.5 | 0.67 | IRF9     | 106.9 | 0.82 |
| NRN1          | 112.8 | 0.63 | ZNF385B  | 120.8 | 0.70 | CLEC2B    | 112.5 | 0.69 | UNC84B    | 112.7 | 0.72 | FLT1     | 110.7 | 0.64 | HEG1     | 108.8 | 0.69 | PMM2     | 106.9 | 0.82 |
| HS2D          | 112.8 | 0.63 | C1S      | 121.2 | 0.71 | IFIT1     | 112.7 | 0.70 | IFIT2     | 112.7 | 0.72 | ZNF313   | 110.8 | 0.65 | UPP2     | 109.3 | 0.73 | GZMB     | 107.3 | 0.86 |
| SOCS2         | 112.8 | 0.63 | IRF9     | 121.5 | 0.72 | SOCS2     | 112.8 | 0.71 | C2orf31   | 112.7 | 0.72 | B2M      | 111.0 | 0.66 | COMMD3   | 109.3 | 0.73 | CDKN1A   | 107.4 | 0.88 |
| ARNTL         | 113.0 | 0.64 | HS2D     | 121.6 | 0.72 | DDX80     | 112.8 | 0.71 | IFIT2     | 112.7 | 0.72 | TRIM14   | 111.0 | 0.66 | ADAMDEC1 | 109.5 | 0.74 | MCOLN2   | 107.6 | 0.90 |
| WARS          | 113.0 | 0.64 | UNC84B   | 121.7 | 0.73 | STEAP4    | 113.2 | 0.73 | THOC4     | 112.9 | 0.73 | VAMP5    | 111.1 | 0.67 | IFIT5    | 109.5 | 0.74 | CYP1B1   | 107.6 | 0.90 |
| STAP1         | 113.0 | 0.64 | OAS2     | 121.9 | 0.74 | C5orf39   | 113.2 | 0.73 | TRAFD1    | 112.9 | 0.73 | IFI6     | 111.3 | 0.68 | NAPA     | 109.5 | 0.74 | ATF3     | 107.6 | 0.90 |
| CCL8          | 113.5 | 0.67 | NAPA     | 122.8 | 0.77 | IL15      | 113.2 | 0.73 | VEGFC     | 112.9 | 0.73 | RARRES3  | 111.3 | 0.68 | DTX3L    | 109.5 | 0.74 | ARHGEF3  | 107.6 | 0.90 |
| IFIT1         | 114.3 | 0.71 | GBP2     | 123.1 | 0.78 | TMEM51    | 113.3 | 0.74 | AMPH      | 112.9 | 0.73 | ABLIM3   | 111.3 | 0.68 | LRG1     | 109.7 | 0.76 | PFKFB3   | 107.7 | 0.92 |
| TRIM38        | 114.3 | 0.71 | HK2      | 123.4 | 0.79 | CFB       | 113.3 | 0.74 | MAFB      | 113.1 | 0.75 | GCA      | 111.9 | 0.72 | PRIC285  | 109.7 | 0.76 | APOBEC3A | 107.7 | 0.92 |
| ZBP1          | 114.3 | 0.71 | FNDC4    | 123.5 | 0.79 | CASP7     | 113.3 | 0.74 | MASTL     | 113.3 | 0.76 | FAM46C   | 111.9 | 0.72 | SAMHD1   | 110.0 | 0.78 | SECTM1   | 107.7 | 0.92 |
| BUB1          | 114.3 | 0.71 | COMMD3   | 123.7 | 0.80 | DDIT4     | 113.5 | 0.75 | TMEM49    | 113.5 | 0.77 | DDX60    | 111.9 | 0.72 | NPAS2    | 110.0 | 0.78 | ZNF313   | 107.9 | 0.93 |
| G6PC          | 114.8 | 0.73 | LIPA     | 123.8 | 0.80 | CCDC109B  | 113.5 | 0.77 | FKBP5     | 113.5 | 0.77 | C22orf28 | 112.1 | 0.73 | USP18    | 110.7 | 0.78 | SLFN5    | 109.9 | 0.93 |
| SAT3          | 114.8 | 0.73 | PI4K2B   | 124.5 | 0.82 | LY6E      | 114.4 | 0.79 | CX3CL1    | 113.7 | 0.78 | MXK      | 112.1 | 0.73 | LIPA     | 110.2 | 0.80 | HLA-G    | 107.9 | 0.93 |
| DTX3L         | 114.8 | 0.73 | CCL5     | 124.6 | 0.83 | CEBPD     | 114.7 | 0.81 | AIM2      | 113.9 | 0.79 | TFEC     | 112.2 | 0.74 | TDRD7    | 110.2 | 0.80 | PCTK2    | 108.2 | 0.97 |
| AIM2          | 115.3 | 0.76 | PRKD2    | 125.1 | 0.84 | MSR1      | 115.2 | 0.84 | JAK2      | 114.1 | 0.81 | MAX      | 112.6 | 0.76 | PBEF1    | 110.4 | 0.82 | AIM2     | 108.2 | 0.97 |
| CTCF          | 115.5 | 0.77 | GMPR     | 125.4 | 0.85 | LAP3      | 115.4 | 0.85 | PUS1      | 114.1 | 0.81 | CCL8     | 112.7 | 0.77 | GBP4     | 110.4 | 0.82 | IL6ST    | 108.5 | 1.01 |
| ABTB2         | 115.5 | 0.77 | NMI      | 125.7 | 0.86 | ULK4      | 115.4 | 0.85 | TNFAIP6   | 114.3 | 0.82 | MAFF     | 112.9 | 0.78 | LAP3     | 110.7 | 0.84 | FAM46A   | 108.7 | 1.03 |
| GK            | 115.5 | 0.77 | GK       | 126.2 | 0.88 | TNFRSF10A | 115.6 | 0.86 | HLA-G     | 114.3 | 0.82 | CD80     | 112.9 | 0.78 | FNDC4    | 110.9 | 0.86 | FNDC3B   | 108.7 | 1.03 |
| TRIM5         | 115.8 | 0.78 | CXCL9    | 126.3 | 0.88 | ARNTL     | 115.6 | 0.86 | STAP1     | 114.3 | 0.82 | EPAS1    | 113.0 | 0.79 | LMO2     | 110.9 | 0.86 | IMPA2    | 109.0 | 1.07 |
| HK2           | 116.0 | 0.80 | DEFB1    | 126.3 | 0.88 | PPM1K     | 115.6 | 0.86 | CNNA1     | 114.3 | 0.82 | CCDC92   | 113.2 | 0.80 | TMEM49   | 110.8 | 0.86 | NFIL3    | 109.0 | 1.07 |
| CCL4          | 116.3 | 0.81 | ANKFY1   | 126.4 | 0.89 | CTCF      | 115.7 | 0.87 | PNPT1     | 114.3 | 0.82 | TAP1     | 113.2 | 0.80 | IFI16    | 110.9 | 0.86 | TAP2     | 109.2 | 1.09 |
| VAMP5         | 116.3 | 0.81 | IFIT1    | 126.5 | 0.89 | ANKFY1    | 116.1 | 0.89 | ZBP1      | 114.3 | 0.82 | PLSCR1   | 113.2 | 0.80 | CD274    | 111.1 | 0.87 | BCL3     | 109.2 | 1.09 |
| PDK1          | 116.8 | 0.84 | CEBPD    | 127.0 | 0.90 | MCOLN2    | 116.1 | 0.89 | ZNF107    | 114.3 | 0.82 | MTHFD2L  | 113.5 | 0.82 | CEBPD    | 111.4 | 0.89 | ERLIN1   | 109.3 | 1.10 |
| PRIC285       | 116.8 | 0.84 | NT5C3    | 127.3 | 0.91 | ABTB2     | 116.2 | 0.90 | ZNF385B   | 114.8 | 0.84 | CCL4     | 114.2 | 0.86 | PI4K2B   | 111.4 | 0.89 | MAFF     | 109.5 | 1.12 |
| CD80          | 116.8 | 0.84 | TYMP     | 128.2 | 0.95 | TAP1      | 116.2 | 0.90 | ABCA9     | 114.8 | 0.84 | CTCF     | 114.6 | 0.88 | IFI6     | 111.4 | 0.89 | FKBP5    | 109.5 | 1.12 |
| IL28RA        | 117.0 | 0.85 | DDX3X    | 128.2 | 0.95 | PXK       | 116.4 | 0.91 | FLJ39739  | 115.0 | 0.85 | ANGPTL1  | 114.8 | 0.89 | PABPC4   | 111.6 | 0.91 | MSR1     | 109.7 | 1.14 |
| LAP3          | 117.0 | 0.85 | FFAR2    | 128.9 | 0.97 | MT1F      | 116.4 | 0.91 | PRKD2     | 115.0 | 0.85 | FBXO6    | 114.9 | 0.90 | IL1RN    | 111.9 | 0.93 | TRIM25   | 109.8 | 1.16 |
| RIK2          | 117.0 | 0.85 | CTCF     | 129.4 | 0.99 | FAM125B   | 117.1 | 0.94 | LAMP3     | 115.2 | 0.87 | TRIM38   | 115.1 | 0.91 | PSMB8    | 112.1 | 0.95 | SERPINE1 | 109.8 | 1.16 |
| CXCL9         | 117.0 | 0.85 | HPSE     | 129.9 | 1.00 | PDGFRL    | 117.1 | 0.94 | DDX3X     | 115.2 | 0.87 | RNASE4   | 115.4 | 0.93 | FAM125B  | 112.1 | 0.95 | RAB27A   | 109.8 | 1.16 |
| SBBP3         | 117.3 | 0.86 | MT1M     | 129.9 | 1.00 | GBP3      | 117.1 | 0.94 | CPT1A     | 115.4 | 0.88 | GTPBP2   | 115.6 | 0.94 | APOL1    | 112.1 | 0.95 | IFI35    | 110.1 | 1.20 |
| GBP1          | 117.5 | 0.88 | TAP1     | 130.0 | 1.01 | EPAS1     | 117.3 | 0.95 | MT1M      | 115.8 | 0.90 | SSBP3    | 115.7 | 0.95 | C5orf27  | 112.3 | 0.97 | FLJ39739 | 110.3 | 1.22 |
| CCL19         | 118.3 | 0.91 | MT1H     | 130.2 | 1.01 | PMM2      | 117.3 | 0.95 | NOD2      | 115.8 | 0.90 | XAF1     | 112.3 | 0.92 | S100A8   | 112.3 | 0.97 | FUT4     | 110.6 | 1.26 |
| ALDH1A1       | 118.3 | 0.91 | CASP7    | 130.2 | 1.01 | TAP2      | 117.3 | 0.95 | CEBPD     | 116.0 | 0.91 | OASL     | 116.1 | 0.97 | C4orf33  | 112.3 | 0.97 | AKT3     | 110.8 | 1.26 |
| PXK           | 118.5 | 0.93 | CHMP5    | 131.0 | 1.04 | SERPINE1  | 117.4 | 0.96 | BUB1      | 116.7 | 0.95 | RNF19B   | 116.5 | 1.00 | TNFAIP6  | 112.9 | 0.97 | IGFBP2   | 110.6 | 1.27 |
| CCDC92        | 118.5 | 0.93 | C22orf28 | 131.2 | 1.05 | THOC4     | 117.4 | 0.96 | BLZF1     | 116.7 | 0.95 | APOBEC3A | 116.5 | 1.00 | ALDH1A1  | 112.3 | 0.97 | TRIM38   | 111.1 | 1.31 |
| HLA-G         | 118.8 | 0.94 | KIAA0040 | 131.4 | 1.05 | UBA7      | 117.6 | 0.97 | LINCRC    | 116.9 | 0.96 | NAPA     | 116.7 | 1.01 | TMEM51   | 112.3 | 0.97 | VEGFC    | 111.4 | 1.35 |
| BATF2         | 118.8 | 0.94 | GBP1     | 131.5 | 1.06 | IFI6      | 117.8 | 0.98 | DDX58     | 117.1 | 0.98 | ABTB2    | 116.7 |      |          |       |      |          |       |      |

| FLUAV    |       |      | PIV3      |       |      | NDV      |       |      | HMPV     |       |      | RSV     |       |      | MV       |       |      | BUNV   |     |   |       |      |
|----------|-------|------|-----------|-------|------|----------|-------|------|----------|-------|------|---------|-------|------|----------|-------|------|--------|-----|---|-------|------|
| Gene     | Rep   | Z    | Gene      | Rep   | Z    | Gene     | Rep   | Z    | Gene     | Rep   | Z    | Gene    | Rep   | Z    | Gene     | Rep   | Z    | Gene   | Rep | Z |       |      |
| LINCR    | 124.3 | 1.23 | PPM1K     | 145.2 | 1.52 | MT1G     | 126.8 | 1.47 | DUSP5    | 123.0 | 1.31 | LAP3    | 122.3 | 1.34 | ELF1     | 115.2 | 1.19 | STEAP4 |     |   | 119.4 | 2.29 |
| SECTM1   | 124.3 | 1.23 | ZBP1      | 145.6 | 1.53 | RNF19B   | 127.0 | 1.48 | NT5C3    | 123.0 | 1.31 | GK      | 122.9 | 1.38 | GBP2     | 115.6 | 1.23 |        |     |   |       |      |
| PI4K2B   | 124.5 | 1.24 | MAFB      | 146.2 | 1.55 | ODC1     | 127.0 | 1.48 | LEPR     | 123.2 | 1.33 | STEAP4  | 123.5 | 1.42 | SAT3     | 116.1 | 1.26 |        |     |   |       |      |
| SLC15A3  | 125.0 | 1.26 | STAT1     | 147.4 | 1.59 | HLA-F    | 128.5 | 1.57 | ERLIN1   | 123.4 | 1.34 | TAP2    | 123.7 | 1.43 | APOL2    | 116.6 | 1.30 |        |     |   |       |      |
| SLC25A28 | 125.7 | 1.30 | GTPBP2    | 147.4 | 1.59 | FLJ23556 | 128.5 | 1.57 | DDX60    | 123.8 | 1.36 | CCL2    | 123.9 | 1.44 | ADFP     | 116.6 | 1.30 |        |     |   |       |      |
| LAMP3    | 125.0 | 1.32 | CCL2      | 148.1 | 1.62 | ADM      | 129.3 | 1.61 | ANKFY1   | 124.0 | 1.37 | AHNAK2  | 124.0 | 1.45 | TRIM5    | 116.6 | 1.30 |        |     |   |       |      |
| S100A8   | 127.0 | 1.37 | B2M       | 148.5 | 1.63 | C9orf91  | 129.3 | 1.61 | DDIT4    | 124.3 | 1.39 | OAS1    | 124.3 | 1.47 | C2orf31  | 117.1 | 1.34 |        |     |   |       |      |
| CCL2     | 127.5 | 1.39 | MAX       | 148.8 | 1.64 | TNFAIP3  | 129.9 | 1.64 | FNDC4    | 124.3 | 1.39 | FNDC3B  | 124.5 | 1.48 | RPL22    | 117.1 | 1.34 |        |     |   |       |      |
| FUT4     | 128.5 | 1.45 | MT1F      | 149.3 | 1.66 | TCF7L2   | 130.4 | 1.67 | HESX1    | 125.1 | 1.43 | PNRC1   | 125.1 | 1.52 | CRP      | 117.3 | 1.36 |        |     |   |       |      |
| SLFN5    | 128.5 | 1.45 | IL1RN     | 149.6 | 1.67 | MT1M     | 130.7 | 1.69 | MT1G     | 125.3 | 1.45 | BATF2   | 126.1 | 1.57 | MKX      | 117.3 | 1.36 |        |     |   |       |      |
| LRG1     | 129.7 | 1.51 | C2orf31   | 150.1 | 1.68 | NOD2     | 131.4 | 1.73 | RNASE4   | 125.3 | 1.45 | TNFSF10 | 126.1 | 1.57 | APOL6    | 117.5 | 1.38 |        |     |   |       |      |
| GTPBP1   | 130.2 | 1.54 | OPTN      | 150.2 | 1.69 | CX3CL1   | 131.9 | 1.75 | TRIM14   | 125.3 | 1.45 | ANKFY1  | 126.2 | 1.58 | TNFSF10  | 117.8 | 1.39 |        |     |   |       |      |
| SCO2     | 130.2 | 1.54 | CCND3     | 150.4 | 1.69 | HLA-C    | 131.9 | 1.75 | GK       | 125.5 | 1.46 | CFB     | 126.6 | 1.60 | P2RY6    | 118.0 | 1.41 |        |     |   |       |      |
| CCDC109B | 132.2 | 1.64 | EPAS1     | 151.4 | 1.73 | ADAMDEC1 | 131.9 | 1.75 | C5orf27  | 125.7 | 1.47 | CASP7   | 126.7 | 1.61 | CCL2     | 118.0 | 1.41 |        |     |   |       |      |
| MAP3K5   | 133.0 | 1.68 | HLA-E     | 153.5 | 1.80 | GAK      | 132.9 | 1.81 | NAPA     | 125.9 | 1.48 | TCF7L2  | 126.7 | 1.61 | DEFB1    | 118.0 | 1.41 |        |     |   |       |      |
| MKX      | 133.7 | 1.72 | PMM2      | 153.7 | 1.81 | CCND3    | 133.8 | 1.86 | CCL4     | 127.2 | 1.56 | PNPT1   | 126.9 | 1.62 | MAFF     | 118.2 | 1.43 |        |     |   |       |      |
| C2orf31  | 135.0 | 1.78 | TNFRSF10A | 154.3 | 1.83 | GCA      | 135.8 | 1.97 | TAGAP    | 127.4 | 1.57 | CHMP5   | 127.2 | 1.64 | FLJ23556 | 118.5 | 1.45 |        |     |   |       |      |
| SMAD3    | 135.2 | 1.80 | CCDC109B  | 156.3 | 1.89 | MARCKS   | 135.8 | 1.97 | CCL2     | 128.5 | 1.63 | DDX58   | 127.5 | 1.66 | ENPP1    | 118.7 | 1.47 |        |     |   |       |      |
| EPAS1    | 135.2 | 1.80 | SSBP3     | 157.4 | 1.93 | IL6ST    | 137.5 | 2.06 | PXK      | 128.5 | 1.63 | SIRPA   | 128.3 | 1.71 | CCDC109B | 118.9 | 1.49 |        |     |   |       |      |
| CREB3L3  | 137.0 | 1.89 | MT1G      | 159.9 | 2.02 | ATP10D   | 137.5 | 2.06 | CFB      | 128.5 | 1.63 | SLFN5   | 128.6 | 1.73 | CCDC75   | 119.4 | 1.52 |        |     |   |       |      |
| GZMB     | 138.0 | 1.94 | P2RY6     | 160.7 | 2.04 | MAX      | 138.2 | 2.10 | HLA-C    | 128.7 | 1.64 | TAGAP   | 128.9 | 1.75 | DCP1A    | 119.7 | 1.54 |        |     |   |       |      |
| TRIM14   | 138.5 | 1.96 | SERPINB9  | 161.3 | 2.06 | JUNB     | 139.6 | 2.17 | PI4K2B   | 128.7 | 1.64 | DTX3L   | 129.6 | 1.78 | MAP3K5   | 119.9 | 1.56 |        |     |   |       |      |
| SLC1A1   | 138.5 | 1.96 | FAM134B   | 164.0 | 2.15 | IFIT2    | 140.6 | 2.23 | APOBEC3A | 128.7 | 1.64 | ENPP1   | 130.2 | 1.82 | GK       | 121.1 | 1.65 |        |     |   |       |      |
| APOL2    | 138.7 | 1.98 | GZMB      | 164.3 | 2.16 | N4BP1    | 140.7 | 2.24 | SIRPA    | 129.1 | 1.66 | GZMB    | 131.3 | 1.89 | TAGAP    | 121.1 | 1.65 |        |     |   |       |      |
| ETV6     | 141.2 | 2.11 | DYNLT1    | 165.9 | 2.21 | IRF9     | 141.8 | 2.30 | SLC1A1   | 129.7 | 1.70 | DDX3X   | 131.8 | 1.92 | FKBP5    | 121.5 | 1.69 |        |     |   |       |      |
| SOCS1    | 142.5 | 2.17 | CREB3L3   | 176.8 | 2.58 | NCF1     | 143.3 | 2.38 | TCF7L2   | 130.4 | 1.74 | TNFAIP6 | 132.4 | 1.96 | CXCL9    | 121.8 | 1.71 |        |     |   |       |      |
| ETV7     | 142.7 | 2.18 | DDIT4     | 181.1 | 2.73 | TAGAP    | 149.3 | 2.71 | UNC93B1  | 130.8 | 1.76 | MAP3K5  | 132.8 | 1.98 | FNDC3B   | 121.8 | 1.71 |        |     |   |       |      |
| LY6E     | 143.0 | 2.20 | MKX       | 196.1 | 3.23 |          |       |      | SLC25A28 | 131.0 | 1.77 | RBM25   | 132.9 | 1.98 | TYMP     | 122.5 | 1.77 |        |     |   |       |      |
| TFEC     | 144.0 | 2.25 |           |       |      |          |       |      | TLR7     | 131.0 | 1.77 | RTP4    | 133.4 | 2.01 | MAFB     | 123.9 | 1.88 |        |     |   |       |      |
| MCOLN2   | 145.5 | 2.33 |           |       |      |          |       |      | MT1H     | 131.2 | 1.78 | NPAS2   | 135.5 | 2.14 | VEGFC    | 123.9 | 1.88 |        |     |   |       |      |
|          |       |      |           |       |      |          |       |      | CCND3    | 131.9 | 1.82 | APOL6   | 139.1 | 2.36 | TLK2     | 125.3 | 1.99 |        |     |   |       |      |
|          |       |      |           |       |      |          |       |      | THBD     | 133.3 | 1.91 | APOL2   | 139.4 | 2.38 | IFIH1    | 131.7 | 2.49 |        |     |   |       |      |
|          |       |      |           |       |      |          |       |      | C9orf91  | 134.0 | 1.94 | MAFB    | 150.2 | 3.03 | DDX58    | 139.8 | 3.12 |        |     |   |       |      |
|          |       |      |           |       |      |          |       |      | HLA-E    | 134.4 | 1.97 |         |       |      |          |       |      |        |     |   |       |      |
|          |       |      |           |       |      |          |       |      | EPAS1    | 134.4 | 1.97 |         |       |      |          |       |      |        |     |   |       |      |
|          |       |      |           |       |      |          |       |      | NPAS2    | 134.6 | 1.98 |         |       |      |          |       |      |        |     |   |       |      |
|          |       |      |           |       |      |          |       |      | B2M      | 136.5 | 2.09 |         |       |      |          |       |      |        |     |   |       |      |
|          |       |      |           |       |      |          |       |      | GCA      | 136.5 | 2.09 |         |       |      |          |       |      |        |     |   |       |      |
|          |       |      |           |       |      |          |       |      | IFIT5    | 137.5 | 2.15 |         |       |      |          |       |      |        |     |   |       |      |
|          |       |      |           |       |      |          |       |      | C22orf28 | 143.9 | 2.51 |         |       |      |          |       |      |        |     |   |       |      |

**Supplementary Table 3.** Gene ontology (GO) analysis of the top 30 inhibitory genes from 12 screens. GO terms associated with a known pathway were assigned to each protein in the list. The *P-values* were determined by a Hypergeometric test, corrected using the Benjamini and Hochberg false discovery rate procedure, and ranked based on enrichment value.

| Supplementary Table 3. Gene ontology analysis of top 30 ISGs in primary screens |                                                          |         |          |         |          |         |          |         |          |         |          |         |          |         |          |         |          |         |          |         |          |         |          |
|---------------------------------------------------------------------------------|----------------------------------------------------------|---------|----------|---------|----------|---------|----------|---------|----------|---------|----------|---------|----------|---------|----------|---------|----------|---------|----------|---------|----------|---------|----------|
| GO Id                                                                           | Term                                                     | EAV     |          | YFV     |          | WNV     |          | CHIKV   |          | SINVA   |          | SINV-G  |          | PIV3    |          | NDV     |          | MvVac   |          | HMPV    |          | FLUAV   |          |
|                                                                                 |                                                          | # genes | p value  |
| GO:0009615                                                                      | response to virus                                        | 13      | 3.12E-13 | 7       | 4.88E-05 | 8       | 1.24E-06 | 8       | 9.11E-06 | 7       | 6.71E-05 | 7       | 4.33E-05 | 8       | 7.39E-06 | 7       | 2.70E-05 | 6       | 7.06E-04 | 5       | 2.65E-02 | 6       | 2.16E-03 |
| GO:0051707                                                                      | response to other organism                               | 14      | 1.93E-09 | 10      | 2.54E-05 | 8       | 1.44E-03 | 7       | 1.31E-02 | 7       | 7.22E-03 | 8       | 3.49E-03 | 7       | 1.02E-02 | 7       | 1.08E-02 |         |          |         |          | 8       | 3.83E-03 |
| GO:0009607                                                                      | response to biotic stimulus                              | 14      | 2.66E-09 | 10      | 2.54E-05 | 8       | 3.11E-03 | 8       | 1.80E-03 | 7       | 1.78E-02 | 7       | 8.92E-03 | 8       | 4.54E-03 | 7       | 1.37E-02 | 7       | 1.19E-02 |         |          | 8       | 4.62E-03 |
| GO:0034340                                                                      | response to type I interferon                            | 7       | 1.79E-07 | 5       | 1.39E-04 |         |          | 5       | 1.70E-04 | 4       | 5.11E-03 |         |          | 6       | 7.39E-06 | 7       | 8.63E-08 | 7       | 6.24E-08 | 5       | 5.04E-04 | 5       | 5.67E-04 |
| GO:0060337                                                                      | type I interferon-mediated signaling pathway             | 7       | 1.79E-07 | 5       | 1.39E-04 |         |          | 6       | 9.11E-06 | 4       | 5.11E-03 | 4       | 3.96E-03 | 6       | 7.39E-06 | 7       | 8.63E-08 | 7       | 6.24E-08 | 5       | 5.04E-04 | 5       | 5.67E-04 |
| GO:0071357                                                                      | cellular response to type I interferon                   | 7       | 1.79E-07 | 5       | 1.39E-04 |         |          | 5       | 1.70E-04 | 4       | 5.11E-03 |         |          | 6       | 7.39E-06 | 7       | 8.63E-08 | 7       | 6.24E-08 | 5       | 5.04E-04 | 5       | 5.67E-04 |
| GO:0051607                                                                      | defense response to virus                                | 6       | 2.45E-06 | 3       | 4.55E-02 | 5       | 1.34E-04 | 4       | 1.80E-03 | 4       | 2.79E-03 | 4       | 2.17E-03 |         |          |         |          |         |          |         |          |         |          |
| GO:0045087                                                                      | innate immune response                                   | 11      | 2.55E-06 | 11      | 5.35E-06 |         |          | 9       | 1.42E-04 | 9       | 1.65E-04 | 9       | 8.41E-05 | 9       | 2.95E-04 | 11      | 4.85E-07 | 11      | 2.81E-07 | 9       | 5.04E-04 | 7       | 1.84E-02 |
| GO:0051704                                                                      | multi-organism process                                   | 14      | 2.86E-06 | 10      | 3.44E-03 | 8       | 2.30E-03 |         |          | 10      | 4.58E-03 | 8       | 4.30E-02 | 9       | 3.37E-02 |         |          |         |          |         |          | 9       | 2.37E-02 |
| GO:0006952                                                                      | defense response                                         | 13      | 6.63E-06 | 12      | 2.54E-05 | 8       | 4.67E-02 | 9       | 5.84E-03 | 9       | 9.04E-03 | 8       | 1.96E-02 | 11      | 3.76E-04 | 11      | 6.38E-05 | 11      | 8.19E-05 | 10      | 4.12E-03 | 9       | 1.42E-02 |
| GO:0060333                                                                      | interferon-gamma-mediated signaling pathway              | 6       | 1.44E-05 |         |          |         |          |         |          |         |          |         |          | 4       | 1.14E-02 | 5       | 1.95E-04 | 4       | 7.86E-03 |         |          |         |          |
| GO:0006955                                                                      | immune response                                          | 12      | 3.72E-05 | 12      | 2.54E-05 | 8       | 3.62E-02 | 10      | 7.36E-04 | 10      | 1.11E-03 | 9       | 3.38E-03 | 10      | 1.93E-03 | 12      | 4.39E-06 | 9       | 3.66E-03 | 11      | 5.04E-04 | 8       | 3.67E-02 |
| GO:0071346                                                                      | cellular response to interferon-gamma                    | 6       | 3.72E-05 | 6       | 2.54E-05 |         |          |         |          | 4       | 1.31E-02 |         |          | 4       | 2.11E-02 | 7       | 5.15E-07 | 4       | 1.19E-02 |         |          |         |          |
| GO:0034341                                                                      | response to interferon-gamma                             | 6       | 8.80E-05 | 7       | 7.09E-06 |         |          |         |          | 4       | 2.20E-02 |         |          | 4       | 3.37E-02 | 7       | 1.30E-06 | 4       | 2.07E-02 |         |          |         |          |
| GO:0032479                                                                      | regulation of type I interferon production               | 5       | 1.09E-04 | 4       | 2.73E-03 | 4       | 3.69E-03 | 5       | 1.28E-04 | 6       | 1.33E-05 | 6       | 6.12E-06 |         |          |         |          |         |          |         |          |         |          |
| GO:0019221                                                                      | cytokine-mediated signaling pathway                      | 8       | 1.16E-04 | 8       | 6.19E-05 |         |          | 7       | 7.49E-04 |         |          | 5       | 4.50E-02 | 12      | 2.05E-09 | 8       | 3.13E-05 | 9       | 1.98E-06 | 7       | 2.60E-03 | 7       | 2.16E-03 |
| GO:0002252                                                                      | immune effector process                                  | 7       | 2.85E-04 |         |          |         |          | 5       | 2.19E-02 |         |          | 5       | 1.56E-02 |         |          |         |          |         |          |         |          |         |          |
| GO:0032481                                                                      | positive regulation of type I interferon production      | 4       | 3.21E-04 | 3       | 1.24E-02 | 4       | 4.53E-04 | 5       | 9.11E-06 | 5       | 1.43E-05 | 5       | 8.74E-06 |         |          |         |          |         |          |         |          |         |          |
| GO:0001819                                                                      | positive regulation of cytokine production               | 6       | 5.64E-04 |         |          | 6       | 5.40E-04 | 6       | 3.60E-04 | 6       | 4.58E-04 | 6       | 2.86E-04 |         |          |         |          |         |          |         |          |         |          |
| GO:0071260                                                                      | cellular response to mechanical stimulus                 | 4       | 2.60E-03 |         |          |         |          | 4       | 1.69E-03 | 3       | 4.75E-02 | 3       | 3.42E-02 |         |          |         |          | 3       | 4.13E-02 |         |          |         |          |
| GO:0002376                                                                      | immune system process                                    | 12      | 2.97E-03 |         |          | 11      | 6.20E-03 |         |          |         |          |         |          | 11      | 1.14E-02 | 14      | 5.25E-06 | 12      | 4.08E-04 | 11      | 1.57E-02 | 10      | 2.99E-02 |
| GO:0032728                                                                      | positive regulation of interferon-beta production        | 3       | 3.00E-03 |         |          | 4       | 8.44E-05 | 4       | 5.07E-05 | 4       | 4.09E-05 | 4       | 4.33E-05 |         |          |         |          |         |          |         |          |         |          |
| GO:0009612                                                                      | response to mechanical stimulus                          | 5       | 3.67E-03 |         |          |         |          | 4       | 3.06E-02 | 4       | 3.80E-02 |         |          |         |          |         |          |         |          |         |          |         |          |
| GO:0071345                                                                      | cellular response to cytokine stimulus                   | 7       | 5.12E-03 | 9       | 2.54E-05 |         |          |         |          |         |          |         |          | 11      | 3.42E-07 | 9       | 9.85E-06 | 8       | 1.95E-04 |         |          | 6       | 2.99E-02 |
| GO:0034214                                                                      | reg. of MyD88-dependent TLR signaling pathway            | 2       | 5.93E-03 | 2       | 5.20E-03 | 2       | 6.82E-03 | 2       | 4.81E-03 | 2       | 5.98E-03 | 2       | 5.13E-03 | 2       | 8.58E-03 | 2       | 6.01E-03 |         |          |         |          |         |          |
| GO:0032848                                                                      | regulation of interferon-beta production                 | 3       | 6.55E-03 |         |          | 4       | 1.80E-04 | 4       | 1.29E-04 | 4       | 1.17E-04 | 4       | 9.17E-05 |         |          |         |          |         |          |         |          |         |          |
| GO:0051240                                                                      | positive regulation of multicellular organismal process  | 7       | 8.12E-03 | 6       | 3.46E-02 | 6       | 4.08E-02 | 6       | 2.93E-02 | 6       | 3.80E-02 | 6       | 1.96E-02 |         |          |         |          |         |          |         |          |         |          |
| GO:0006950                                                                      | response to stress                                       | 15      | 8.54E-03 |         |          |         |          |         |          |         |          |         |          | 14      | 5.12E-03 |         |          |         |          | 16      | 2.07E-03 |         |          |
| GO:0035928                                                                      | cytoplasmic PRR signal. pathway in resp. to virus        | 2       | 1.02E-02 |         |          | 3       | 8.44E-05 | 3       | 5.07E-05 | 3       | 4.09E-05 | 3       | 4.33E-05 |         |          |         |          |         |          |         |          |         |          |
| GO:0071166                                                                      | cell surface receptor signaling pathway                  | 13      | 1.07E-02 | 12      | 1.85E-02 |         |          |         |          |         |          |         |          |         |          |         |          | 13      | 1.27E-03 |         |          | 12      | 2.15E-02 |
| GO:0042981                                                                      | regulation of apoptotic process                          | 10      | 1.26E-02 | 9       | 3.02E-02 |         |          | 9       | 2.29E-02 |         |          |         |          | 9       | 1.85E-02 |         |          |         |          |         |          |         |          |
| GO:0043067                                                                      | regulation of programmed cell death                      | 10      | 1.30E-02 | 9       | 3.11E-02 |         |          | 9       | 2.36E-02 |         |          |         |          | 9       | 1.89E-02 |         |          |         |          |         |          |         |          |
| GO:0045351                                                                      | type I interferon biosynthetic process                   | 2       | 1.49E-02 |         |          | 2       | 1.42E-02 |         |          |         |          | 2       | 1.20E-02 | 2       | 2.14E-02 |         |          |         |          |         |          |         |          |
| GO:0009266                                                                      | response to temperature stimulus                         | 4       | 2.58E-02 |         |          |         |          |         |          |         |          |         |          |         |          |         |          |         |          |         |          |         |          |
| GO:0009628                                                                      | response to abiotic stimulus                             | 8       | 2.68E-02 |         |          |         |          |         |          |         |          |         |          |         |          |         |          |         |          |         |          |         |          |
| GO:0032727                                                                      | positive regulation of interferon-alpha production       | 2       | 2.87E-02 |         |          | 3       | 3.68E-04 | 3       | 2.01E-04 | 3       | 2.26E-04 | 3       | 2.15E-04 |         |          |         |          | 3       | 3.50E-02 |         |          |         |          |
| GO:0007249                                                                      | I-kappaB kinase/NF-kappaB cascade                        | 3       | 4.60E-02 |         |          |         |          | 3       | 3.25E-02 | 3       | 3.87E-02 |         |          |         |          |         |          |         |          |         |          |         |          |
| GO:0071214                                                                      | cellular response to abiotic stimulus                    | 4       | 4.60E-02 |         |          |         |          | 5       | 1.93E-03 |         |          |         |          |         |          |         |          |         |          |         |          |         |          |
| GO:0001817                                                                      | immune system process                                    |         |          | 14      | 2.54E-05 |         |          |         |          | 6       | 1.17E-02 | 6       | 6.73E-03 |         |          |         |          |         |          |         |          |         |          |
| GO:0034097                                                                      | response to cytokine stimulus                            |         |          | 10      | 2.54E-05 |         |          |         |          |         |          |         |          | 10      | 1.78E-05 | 10      | 4.39E-06 | 8       | 7.06E-04 |         |          |         |          |
| GO:0010033                                                                      | response to organic substance                            |         |          | 13      | 1.04E-03 |         |          |         |          |         |          |         |          |         |          |         |          | 11      | 1.43E-02 | 11      | 1.19E-02 |         |          |
| GO:0070887                                                                      | cellular response to chemical stimulus                   |         |          | 12      | 1.16E-03 |         |          |         |          |         |          |         |          | 11      | 1.25E-02 | 10      | 1.79E-02 |         |          |         |          |         |          |
| GO:0042221                                                                      | response to chemical stimulus                            |         |          | 15      | 2.62E-03 |         |          |         |          |         |          |         |          |         |          |         |          |         |          |         |          |         |          |
| GO:0071310                                                                      | cellular response to organic substance                   |         |          | 10      | 3.90E-03 |         |          |         |          |         |          |         |          | 11      | 1.43E-03 | 10      | 2.41E-03 | 9       | 1.19E-02 |         |          |         |          |
| GO:2000110                                                                      | negative regulation of macrophage apoptotic process      |         |          | 2       | 5.20E-03 |         |          |         |          |         |          |         |          |         |          |         |          |         |          |         |          |         |          |
| GO:0034612                                                                      | response to tumor necrosis factor                        |         |          | 4       | 9.72E-03 |         |          |         |          |         |          |         |          |         |          |         |          |         |          |         |          |         |          |
| GO:2000109                                                                      | regulation of macrophage apoptotic process               |         |          | 2       | 2.13E-02 |         |          |         |          |         |          |         |          |         |          |         |          |         |          |         |          |         |          |
| GO:2000501                                                                      | regulation of natural killer cell chemotaxis             |         |          | 2       | 2.13E-02 |         |          |         |          |         |          |         |          |         |          |         |          |         |          |         |          |         |          |
| GO:0097190                                                                      | apoptotic signaling pathway                              |         |          | 3       | 2.32E-02 |         |          |         |          |         |          |         |          |         |          |         |          |         |          |         |          |         |          |
| GO:0071347                                                                      | cellular response to interleukin-1                       |         |          | 3       | 2.41E-02 |         |          |         |          |         |          |         |          |         |          |         |          |         |          |         |          |         |          |
| GO:0010759                                                                      | positive regulation of macrophage chemotaxis             |         |          | 2       | 2.69E-02 |         |          |         |          |         |          |         |          |         |          |         |          |         |          |         |          |         |          |
| GO:0010758                                                                      | regulation of macrophage chemotaxis                      |         |          | 2       | 4.07E-02 |         |          |         |          |         |          |         |          |         |          |         |          |         |          |         |          |         |          |
| GO:0051384                                                                      | response to glucocorticoid stimulus                      |         |          | 4       | 4.35E-02 |         |          |         |          |         |          |         |          |         |          |         |          |         |          |         |          |         |          |
| GO:0071622                                                                      | regulation of granulocyte chemotaxis                     |         |          | 2       | 4.56E-02 |         |          |         |          |         |          |         |          |         |          |         |          |         |          |         |          |         |          |
| GO:0071675                                                                      | regulation of mononuclear cell migration                 |         |          | 2       | 4.56E-02 |         |          |         |          |         |          |         |          |         |          |         |          |         |          |         |          |         |          |
| GO:0031960                                                                      | response to corticosteroid stimulus                      |         |          | 4       | 4.98E-02 |         |          |         |          |         |          |         |          |         |          |         |          |         |          |         |          |         |          |
| GO:0032647                                                                      | regulation of interferon-alpha production                |         |          | 3       | 1.53E-03 | 3       | 9.20E-04 | 4       | 1.43E-05 | 3       | 1.07E-03 |         |          |         |          |         |          |         |          |         |          |         |          |
| GO:0009597                                                                      | detection of virus                                       |         |          | 2       | 6.82E-03 | 2       | 4.81E-03 | 3       | 1.43E-05 | 2       | 5.13E-03 |         |          |         |          |         |          |         |          |         |          |         |          |
| GO:0034344                                                                      | regulation of type III interferon production             |         |          | 2       | 6.82E-03 | 2       | 4.81E-03 | 3       | 1.43E-05 | 2       | 5.13E-03 |         |          |         |          |         |          |         |          |         |          |         |          |
| GO:0080134                                                                      | regulation of response to stress                         |         |          | 8       | 6.82E-03 |         |          |         |          |         |          |         |          |         |          |         |          |         |          |         |          |         |          |
| GO:0045088                                                                      | regulation of innate immune response                     |         |          | 5       | 1.12E-02 |         |          |         |          |         |          |         |          |         |          |         |          |         |          |         |          |         |          |
| GO:0002753                                                                      | cytoplasmic PRR signaling pathway                        |         |          | 3       | 1.31E-02 | 3       | 9.96E-03 | 3       | 1.17E-02 | 3       | 8.45E-03 |         |          |         |          |         |          | 5       | 8.65E-03 |         |          |         |          |
| GO:0031347                                                                      | regulation of defense response                           |         |          | 6       | 2.03E-02 |         |          |         |          |         |          |         |          |         |          |         |          |         |          |         |          |         |          |
| GO:0045089                                                                      | positive regulation of innate immune response            |         |          | 4       | 3.52E-02 |         |          |         |          |         |          |         |          |         |          |         |          |         |          |         |          |         |          |
| GO:0006917                                                                      | induction of apoptosis                                   |         |          | 6       | 1.66E-02 |         |          |         |          |         |          |         |          |         |          |         |          |         |          |         |          |         |          |
| GO:0042108                                                                      | positive regulation of cytokine biosynthetic process     |         |          | 3       | 4.46E-02 |         |          |         |          |         |          |         |          | 4       | 3.49E-03 |         |          |         |          |         |          |         |          |
| GO:0044419                                                                      | interspecies interaction between organisms               |         |          | 7       | 4.65E-03 | 7       | 2.60E-03 |         |          |         |          |         |          |         |          |         |          |         |          |         |          |         |          |
| GO:0034121                                                                      | regulation of toll-like receptor signaling pathway       |         |          | 3       | 7.59E-03 |         |          |         |          |         |          |         |          |         |          |         |          | 3       | 6.98E-03 |         |          | 3       | 1.42E-02 |
| GO:0032480                                                                      | negative regulation of type I interferon production      |         |          | 3       | 1.31E-02 | 3       | 9.48E-03 |         |          |         |          |         |          |         |          |         |          |         |          |         |          |         |          |
| GO:0050991                                                                      | regulation of defense response to virus by host          |         |          |         |          |         |          |         |          |         |          |         |          | 3       | 3.94E-03 |         |          |         |          |         |          |         |          |
| GO:0043901                                                                      | negative regulation of multi-organism process            |         |          |         |          |         |          |         |          |         |          |         |          | 3       | 5.13E-03 |         |          |         |          |         |          |         |          |
| GO:0050889                                                                      | negative regulation of defense response to virus by host |         |          |         |          |         |          |         |          |         |          |         |          | 2       | 8.45E-03 |         |          |         |          |         |          |         |          |
